# Supplementary material for: Mechanisms of Sodium-Acetate-Induced DHA Accumulation in a DHA-Producing Microalga, Crypthecodinium sp. SUN
Source: Mar Drugs. 2022 Aug 9;20(8):508. doi: 10.3390/md20080508 (PMC9409966; doi:10.3390/md20080508)
Supplement: Supplementary file 1 [file marinedrugs-20-00508-s001.zip › Supplementary file 2.pdf]

**Table S1**Overview of DEG in different carbon sources in *Crypthecodinium* sp. SUN

| group     | total DEG | up   | down |
|-----------|-----------|------|------|
| G0_vs_G6  | 4461      | 2185 | 2276 |
| G0_vs_M6  | 3239      | 1443 | 1796 |
| G0_vs_S6  | 2350      | 1010 | 1340 |
| G0_vs_G12 | 3170      | 1687 | 1483 |
| G0_vs_M12 | 3830      | 1743 | 2087 |
| G0_vs_S12 | 2548      | 832  | 1716 |
| G0_vs_G24 | 1729      | 1033 | 696  |
| G0_vs_M24 | 2370      | 883  | 1487 |
| G0_vs_S24 | 2404      | 853  | 1551 |
| G0_vs_G48 | 1329      | 678  | 651  |
| G0_vs_M48 | 2230      | 955  | 1275 |
| G0_vs_S48 | 2992      | 900  | 2092 |

**Table S2**Overview of all number of metabolites and different number of metabolites among three groups in *Crypthecodinium* sp. SUN

| Name        | G12_vs_G0 | M12_vs_G0 | S12_vs_G0 | G48_vs_G0 | M48_vs_G0 | S48_vs_G0 |
|-------------|-----------|-----------|-----------|-----------|-----------|-----------|
| all_number  | 514       | 514       | 514       | 514       | 514       | 514       |
| diff_number | 68        | 63        | 55        | 56        | 42        | 46        |
