# Supplementary material for: Mechanisms of Sodium-Acetate-Induced DHA Accumulation in a DHA-Producing Microalga, Crypthecodinium sp. SUN
Source: Mar Drugs. 2022 Aug 9;20(8):508. doi: 10.3390/md20080508 (PMC9409966; doi:10.3390/md20080508)
Supplement: Supplementary file 1 [file marinedrugs-20-00508-s001.zip › Supplementary file 3.xlsx]

## Sheet: A-CoA
Supplementary file 3: The RNA-seq data of genes involved in selected biological pathways
					Log2fc					TPM						pvalue					padjust					regulate					significant
Pathway	Group	Gene name	Abbreviation	gene_id	6h	12h	24h	48h		0h	6h	12h	24h	48h		6h	12h	24h	48h		6h	12h	24h	48h		6h	12h	24h	48h		6h	12h	24h	48h
Acetyl-CoA biosynthesis	G	pyruvate dehydrogenase E1 component	PDH	CRYCO00063571	0.225724	-0.43641	-0.887549	-1.33044		45.7033	61.43	37.7433	28.9633	19.6		0.00374304	0.000204283	4.24671e-25	1.63212e-58		0.014627	0.00181928	9.87505e-23	1.46661e-55		up	down	down	down		no	no	no	yes
	M	pyruvate dehydrogenase E2 component	PDH	CRYCO00063571	0.252602	0.0700342	-0.562581	-0.83743		45.7033	61.6967	56.2833	34.8833	26.4167		0.00083604	0.375152	3.00162e-13	1.97702e-22		0.0049538	0.549764	1.11815e-11	2.35403e-20		up	up	down	down		no	no	no	no
	S	pyruvate dehydrogenase E3 component	PDH	CRYCO00063571	0.0666026	0.0682669	-0.424729	-0.875997		45.7033	53.39	53.0867	38.3167	24.2167		0.333619	0.360876	1.29256e-07	1.78345e-26		0.542296	0.561752	2.27503e-06	2.46789e-24		up	up	down	down		no	no	no	no
	G	pyruvate dehydrogenase E1 component	PDH	CRYCO00063566	0.0491474	-0.498395	-1.15211	-1.57943		29.3667	34.5	22.98	15.1233	10.5867		0.739807	0.00403909	3.35513e-11	6.7897e-19		0.839866	0.02097	1.57876e-09	8.25353e-17		up	down	down	down		no	no	yes	yes
	M	pyruvate dehydrogenase E1 component	PDH	CRYCO00063566	-0.0169532	-0.00106247	-0.650618	-1.05919		29.3667	33.5767	34.1233	20.86	14.1267		0.920439	0.994762	2.04271e-05	2.65201e-10		0.95822	0.996872	0.000213096	1.00508e-08		down	down	down	down		no	no	no	yes
	S	pyruvate dehydrogenase E1 component	PDH	CRYCO00063566	0.051643	-0.0460218	-0.800039	-0.761181		29.3667	34.2967	32.0467	19.1533	16.92		0.711745	0.751478	5.99075e-05	2.79537e-06		0.839958	0.861718	0.000566599	4.56521e-05		up	down	down	down		no	no	no	no
	G	pyruvate dehydrogenase	PDH	CRYCO00058673	0.533594	0.095566	-0.0105614	-0.448368		13.3367	16.95	14.5667	13.8633	9.21		0.000133656	0.54947	0.944816	0.0101642		0.000856663	0.726974	0.97855	0.0648213		up	up	down	down		no	no	no	no
	M	pyruvate dehydrogenase	PDH	CRYCO00058673	0.419771	0.460879	0.0193584	-0.243174		13.3367	16.3567	19.0567	11.7867	10.8333		0.00369443	0.000880765	0.893228	0.180863		0.0168837	0.00448582	0.948417	0.401		up	up	up	down		no	no	no	no
	S	pyruvate dehydrogenase	PDH	CRYCO00058673	0.303495	0.42191	0.176508	-0.431809		13.3367	16.8733	17.16	13.5167	9.27667		0.0282953	0.00265454	0.219863	0.00765976		0.0967084	0.0139105	0.417738	0.0372926		up	up	up	down		no	no	no	no
	G	pyruvate dehydrogenase	PDH	CRYCO00042136	-0.064855	-0.197086	-0.154188	0.0516461		78.5133	81.4467	75.76	78.7567	90.21		0.472113	0.0999311	0.15466	0.62452		0.630893	0.238415	0.383997	0.834792		down	down	down	up		no	no	no	no
	M	pyruvate dehydrogenase	PDH	CRYCO00042136	-0.349058	-1.09821	-2.268	-2.1992		78.5133	65.1633	37.88	15.1633	15.35		0.000901577	1.53621e-24	1.09125e-113	7.45282e-63		0.00528066	2.33757e-22	2.0513e-110	5.09624e-60		down	down	down	down		no	yes	yes	yes
	S	pyruvate dehydrogenase	PDH	CRYCO00042136	-0.420426	-1.12167	-2.03263	-2.22183		78.5133	62.9867	34.9267	18.3367	14.8233		3.32827e-06	7.48764e-32	1.63964e-83	6.29352e-101		5.0841e-05	2.47113e-29	2.53123e-80	1.02473e-97		down	down	down	down		no	yes	yes	yes
	G	pyruvate dehydrogenase	PDH	CRYCO00055885	-0.282873	-0.28701	-0.219665	-0.299041		32.5467	29.2467	28.9367	31.88	28.5933		0.000696043	0.00950641	0.0189771	0.00200754		0.00352777	0.0411924	0.0910496	0.0183549		down	down	down	down		no	no	no	no
	M	pyruvate dehydrogenase	PDH	CRYCO00055885	-0.402214	-0.198602	-0.20532	-0.0394856		32.5467	26.7567	32.0467	30.8833	33.59		3.38332e-06	0.0222287	0.0223433	0.65843		4.27481e-05	0.066489	0.0815417	0.825647		down	down	down	down		no	no	no	no
	S	pyruvate dehydrogenase	PDH	CRYCO00055885	-0.38213	-0.070408	-0.0556809	0.112261		32.5467	27.4333	33.0767	34.9833	35.5233		3.13599e-06	0.425543	0.515569	0.250085		4.82356e-05	0.62125	0.707081	0.455212		down	down	down	up		no	no	no	no
	G	pyruvate dehydrogenase	PDH	CRYCO00081196	0.30423	0.424385	0.414371	0.459706		37.4833	52.44	58.1267	59.6267	55.9733		1.68e-05	8.44967e-05	1.61063e-05	1.84027e-08		0.000139782	0.0008717	0.000249361	6.65633e-07		up	up	up	up		no	no	no	no
	M	pyruvate dehydrogenase	PDH	CRYCO00081196	0.215359	-0.215175	-0.858991	-1.11214		37.4833	47.78	36.5133	22.2867	17.38		0.029388	0.00825185	1.34342e-28	2.04621e-28		0.0877744	0.0295466	1.73241e-26	3.53588e-26		up	down	down	down		no	no	no	yes
	S	pyruvate dehydrogenase	PDH	CRYCO00081196	0.233833	-0.230986	-0.668161	-1.02696		37.4833	48.1267	34.4333	26.0933	17.9667		0.000627388	0.00520301	7.21056e-17	2.16132e-28		0.00453887	0.0242085	4.61949e-15	3.29919e-26		up	down	down	down		no	no	no	yes
	G	pyruvate dehydrogenase	PDH	CRYCO00042139	0.175026	0.119545	-0.0371795	-0.167678		22.9033	29.15	27.4533	25.7333	22.2067		0.153988	0.391629	0.77806	0.2658		0.284276	0.596985	0.906842	0.554316		up	up	down	down		no	no	no	no
	M	pyruvate dehydrogenase	PDH	CRYCO00042139	0.30899	0.283749	0.0393325	-0.151076		22.9033	32.0333	32.19	26.13	21.26		0.0136005	0.0184906	0.742021	0.281908		0.0479498	0.0572533	0.864238	0.523422		up	up	up	down		no	no	no	no
	S	pyruvate dehydrogenase	PDH	CRYCO00042139	0.124896	0.364184	0.0625954	-0.0641071		22.9033	27.8033	32.5167	27.0033	21.7933		0.314969	0.00259762	0.60776	0.61996		0.523192	0.0136601	0.775488	0.781253		up	up	up	down		no	no	no	no
	G	pyruvate dehydrogenase	PDH	CRYCO00041626	0.146829	0.043922	0.109147	0.250035		10.6133	12.9033	12.6333	13.8667	16.2767		0.261663	0.775831	0.441216	0.0636435		0.418396	0.88016	0.696426	0.235013		up	up	up	up		no	no	no	no
	M	pyruvate dehydrogenase	PDH	CRYCO00041626	0.155813	0.015772	0.0814747	0.351215		10.6133	13.24	12.9767	13.7567	16.94		0.251745	0.90985	0.563245	0.0242014		0.427292	0.950229	0.747801	0.101616		up	up	up	up		no	no	no	no
	S	pyruvate dehydrogenase	PDH	CRYCO00041626	0.0693767	0.0955095	0.0801812	0.0430287		10.6133	12.35	12.6567	13.61	13.23		0.604631	0.475809	0.544345	0.76285		0.769076	0.663637	0.729548	0.873225		up	up	up	up		no	no	no	no
	G	pyruvate dehydrogenase	PDH	CRYCO00042129	-0.0493394	-0.205377	-0.18048	-0.184427		34.6367	37.8233	33.1933	35.27	33.03		0.675666	0.159338	0.155093	0.130961		0.79377	0.330074	0.384637	0.371368		down	down	down	down		no	no	no	no
	M	pyruvate dehydrogenase	PDH	CRYCO00042129	0.0628579	0.0237832	-0.00172691	0.271521		34.6367	41.1767	40.71	38.49	42.7933		0.602287	0.843113	0.987921	0.0222036		0.75095	0.91137	0.994724	0.0956096		up	up	down	up		no	no	no	no
	S	pyruvate dehydrogenase	PDH	CRYCO00042129	0.0494325	0.0679212	0.125363	0.373988		34.6367	40.06	40.28	42.77	44.45		0.662934	0.560865	0.277532	0.000832155		0.80815	0.731964	0.485536	0.00626225		up	up	up	up		no	no	no	no
	G	pyruvate dehydrogenase	PDH	CRYCO00081193	0.294271	0.13218	0.208947	0.12441		172.247	246.88	221.407	244.297	196.96		1.5e-05	0.157946	0.00972807	0.10627		0.000126455	0.328164	0.0544513	0.326528		up	up	up	up		no	no	no	no
	M	pyruvate dehydrogenase	PDH	CRYCO00081193	0.301077	0.206665	0.0491477	0.0878446		172.247	247.83	232.44	190.9	175.013		0.00011597	0.00430477	0.475957	0.288328		0.000919454	0.0171922	0.679975	0.530302		up	up	up	up		no	no	no	no
	S	pyruvate dehydrogenase	PDH	CRYCO00081193	0.306453	0.341767	0.0886117	0.130078		172.247	240.977	242.5	198.11	165.827		8.99124e-06	2.54348e-06	0.205042	0.0708471		0.000121203	3.52391e-05	0.399066	0.194704		up	up	up	up		no	no	no	no
	G	dihydrolipoamide dehydrogenase	PDH	CRYCO00052751	-0.213904	-0.0518238	-0.402609	-0.331485		13.87	13.3267	14.7333	12.07	11.9		0.073487	0.706804	0.00328015	0.007994		0.163133	0.836878	0.0231714	0.0538511		down	down	down	down		no	no	no	no
	M	dihydrolipoamide dehydrogenase	PDH	CRYCO00052751	-0.341813	-0.713917	-0.533675	-0.701883		13.87	12.0133	9.69	10.5933	8.96333		0.00705999	2.8508e-08	5.36031e-06	9.47437e-08		0.0284172	4.40779e-07	6.41321e-05	2.2997e-06		down	down	down	down		no	no	no	no
	S	dihydrolipoamide dehydrogenase	PDH	CRYCO00052751	-0.265892	-0.671447	-0.56065	-0.725766		13.87	12.4867	9.40333	10.5267	8.45667		0.0249109	8.10214e-08	7.44437e-06	5.98215e-09		0.0877376	1.6243e-06	8.93343e-05	1.68713e-07		down	down	down	down		no	no	no	no
	G	acetyl-CoA synthetase	ACS	CRYCO00046253	0.200345	0.244095	0.147399	0.101338		29.66	38.3233	38.9233	38.4333	35.3533		0.022595	0.052802	0.146809	0.318504		0.064256	0.15105	0.372263	0.607905		up	up	up	up		no	no	no	no
	M	acetyl-CoA synthetase	ACS	CRYCO00046253	-0.280799	-0.589072	-0.723783	-0.316989		29.66	27.0167	22.8633	20.02	25.5633		0.00346594	4.91624e-10	3.16827e-14	0.00119369		0.0160511	1.05173e-08	1.32801e-12	0.00964826		down	down	down	down		no	no	no	no
	S	acetyl-CoA synthetase	ACS	CRYCO00046253	-0.14937	-0.743986	-0.74974	-0.358938		29.66	29.4167	19.14	19.9267	23.6567		0.0824574	4.31871e-15	4.04363e-14	0.000221602		0.212819	2.91492e-13	1.90281e-12	0.00206971		down	down	down	down		no	no	no	no
	G	acetyl-CoA synthetase	ACS	CRYCO00046254	0.118847	0.0985198	0.111215	-0.277177		29.3133	35.8467	34.5967	36.6333	26.3967		0.275198	0.430046	0.357008	0.0403805		0.433716	0.631378	0.622707	0.172901		up	up	up	down		no	no	no	no
	M	acetyl-CoA synthetase	ACS	CRYCO00046254	-0.457447	-0.889893	-1.39251	-1.11374		29.3133	24.0467	18.2633	12.3733	14.0067		0.000187371	2.97985e-13	1.60592e-29	3.0988e-18		0.00138578	1.08006e-11	2.21093e-27	2.69686e-16		down	down	down	down		no	no	yes	yes
	S	acetyl-CoA synthetase	ACS	CRYCO00046254	-0.381648	-1.03368	-1.27223	-1.30305		29.3133	24.97	15.7267	13.6433	11.8333		0.000584946	4.56665e-16	7.3414e-23	2.1081e-24		0.00430349	3.55337e-14	7.60471e-21	2.54258e-22		down	down	down	down		no	yes	yes	yes
	G	acetyl-CoA synthetase	ACS	CRYCO00046255	0.461135	0.409231	0.518986	-0.0114347		38.3067	59.3133	55.7433	62.7767	40.7233		0.00174674	0.0128641	0.000911186	0.949373		0.00765796	0.0518505	0.00811747	0.982162		up	up	up	down		no	no	no	no
	M	acetyl-CoA synthetase	ACS	CRYCO00046255	-0.26601	-0.620488	-1.15481	-0.944031		38.3067	36.3733	28.6833	19.07	19.96		0.0992044	0.00221861	4.0517e-11	1.2775e-07		0.220549	0.00986468	1.15331e-09	3.01522e-06		down	down	down	down		no	no	yes	no
	S	acetyl-CoA synthetase	ACS	CRYCO00046255	-0.348416	-1.05354	-1.14757	-1.35372		38.3067	33.6133	20.5	19.3933	14.6267		0.0283678	1.8322e-09	2.846e-11	3.46648e-13		0.0968747	5.22305e-08	9.38671e-10	1.75469e-11		down	down	down	down		no	yes	yes	yes
	G	acetyl-CoA synthetase	ACS	CRYCO00046259	-0.531029	-1.12915	-1.71886	-2.37668		62.9867	49.0433	31.8367	22.2433	13.3733		2.58532e-10	5.28327e-20	5.71509e-64	3.44591e-124		6.27718e-09	1.37445e-17	1.36882e-60	3.94798e-120		down	down	down	down		no	yes	yes	yes
	M	acetyl-CoA synthetase	ACS	CRYCO00046259	-0.587546	-0.536946	-0.614154	-0.384921		62.9867	46.5433	50.1667	45.56	51.4167		6.69849e-12	5.91664e-10	4.30217e-14	9.74225e-06		2.99514e-10	1.24862e-08	1.76841e-12	0.000152642		down	down	down	down		no	no	no	no
	S	acetyl-CoA synthetase	ACS	CRYCO00046259	-0.672356	-0.517651	-0.654986	-0.279471		62.9867	43.4967	47.6967	45.15	52.67		2.02129e-17	1.76435e-09	4.0299e-15	0.000977975		2.43207e-15	5.0584e-08	2.14288e-13	0.00715565		down	down	down	down		no	no	no	no
	G	acetyl-CoA synthetase	ACS	CRYCO00046260	-0.262582	-0.913555	-1.4815	-2.63909		70.2233	65.0933	40.62	28.7633	12.2233		0.0254182	6.90584e-09	1.93361e-28	4.20408e-70		0.0707131	2.4054e-07	5.95016e-26	5.83833e-67		down	down	down	down		no	no	yes	yes
	M	acetyl-CoA synthetase	ACS	CRYCO00046260	-0.336724	-0.267126	-0.412541	-0.535254		70.2233	61.6567	66.8333	57.9867	50.4467		0.00720064	0.0266778	0.00061137	0.000112468		0.0288474	0.0768801	0.00422154	0.00130539		down	down	down	down		no	no	no	no
	S	acetyl-CoA synthetase	ACS	CRYCO00046260	-0.441036	-0.350346	-0.522581	-0.654848		70.2233	56.71	59.7	54.6167	44.6		0.00017566	0.00375012	9.94174e-06	4.81907e-06		0.00155259	0.0184971	0.000115931	7.40708e-05		down	down	down	down		no	no	no	no
	G	acetyl-CoA synthetase	ACS	CRYCO00049404	-0.393326	-0.317222	-0.394622	-0.308719		842.653	758.493	773.407	752.23	695.37		4.03e-07	0.0027766	1.14228e-05	0.000618735		5.07e-06	0.0155142	0.000184172	0.00699098		down	down	down	down		no	no	no	no
	M	acetyl-CoA synthetase	ACS	CRYCO00049404	-0.41783	-0.354789	-0.248973	-0.0905471		842.653	754.153	784.743	801.373	780.917		6.3453e-07	7.07829e-05	0.00153944	0.282915		9.92662e-06	0.000497542	0.0092046	0.524478		down	down	down	down		no	no	no	no
	S	acetyl-CoA synthetase	ACS	CRYCO00049404	-0.366549	-0.217866	-0.207735	0.0824409		842.653	776.887	852.79	843.097	856.54		1.17945e-06	0.00763029	0.00850863	0.327686		2.04172e-05	0.0329386	0.0373679	0.538701		down	down	down	up		no	no	no	no

## Sheet: lipid
					Log2fc					TPM						pvalue					padjust					regulate					significant
Pathway	Group	Gene name	Abbreviation	gene_id	6h	12h	24h	48h		0h	6h	12h	24h	48h		6h	12h	24h	48h		6h	12h	24h	48h		6h	12h	24h	48h		6h	12h	24h	48h
Fatty acid synthase pathway
	G	acetyl-CoA carboxylase	ACCase	CRYCO00039987	1.50662	1.04026	1.17593	0.495194		25.35	77.1	56.1233	69.13	34.9867		1.73152e-09	4.47193e-09	2.41023e-12	0.108787		3.62779e-08	1.63406e-07	1.33166e-10	0.331438		up	up	up	up		yes	yes	yes	no
	M	acetyl-CoA carboxylase	ACCase	CRYCO00039987	0.944779	0.658291	-0.0436317	-0.348238		25.35	56.08	44.48	25.1767	20.2533		0.000263278	0.0222178	0.867089	0.266003		0.00186046	0.0664643	0.93453	0.506646		up	up	down	down		no	no	no	no
	S	acetyl-CoA carboxylase	ACCase	CRYCO00039987	0.787966	0.336654	0.0292167	-0.790355		25.35	49.8733	31.15	25.6967	11.8067		0.00188347	0.20144	0.911655	0.0129172		0.0112633	0.384083	0.95753	0.0558428		up	up	up	down		no	no	no	no
	G	acetyl-CoA carboxylase	ACCase	CRYCO00056937	-0.0740011	-0.249944	0.0238186	0.0417488		11.14	11.9	10.34	13.12	12.55		0.587164	0.11916	0.867504	0.751015		0.726299	0.269207	0.947924	0.89726		down	down	up	up		no	no	no	no
	M	acetyl-CoA carboxylase	ACCase	CRYCO00056937	-0.17676	-0.173573	-0.0078788	-0.139913		11.14	11.0133	11.3867	12.26	10.6067		0.202466	0.201185	0.951459	0.302644		0.368525	0.356675	0.977576	0.544906		down	down	down	down		no	no	no	no
	S	acetyl-CoA carboxylase	ACCase	CRYCO00056937	-0.159244	-0.206411	-0.0179989	-0.0999982		11.14	11.0267	10.53	12.3833	10.4667		0.238327	0.143143	0.892303	0.475529		0.439009	0.303081	0.948132	0.672583		down	down	down	down		no	no	no	no
	G	acetyl-CoA carboxylase	ACCase	CRYCO00019923	-0.487055	-0.767658	-0.383616	-0.408307		18.8467	15.3167	12.2	16.5667	15.7267		9.17e-07	3.05999e-09	0.00121889	0.000857797		1.06e-05	1.17557e-07	0.0103718	0.0091827		down	down	down	down		no	no	no	no
	M	acetyl-CoA carboxylase	ACCase	CRYCO00019923	-0.489753	-1.03255	-0.390699	-0.275524		18.8467	15.0867	10.7	15.9367	16.75		3.65298e-06	7.07424e-20	4.57573e-05	0.00897525		4.57792e-05	6.06659e-18	0.000433652	0.0480225		down	down	down	down		no	yes	no	no
	S	acetyl-CoA carboxylase	ACCase	CRYCO00019923	-0.326001	-0.61503	-0.205175	-0.155369		18.8467	16.3933	13.3667	18.6867	16.95		0.000726578	1.08432e-08	0.0349663	0.16253		0.00512475	2.63878e-07	0.113342	0.344328		down	down	down	down		no	no	no	no
	G	acetyl-CoA carboxylase	ACCase	CRYCO00045968	0.126932	-0.20089	-0.0921647	0.100936		12.9333	15.5133	11.9167	13.4333	14.9333		0.207376	0.103927	0.401402	0.315536		0.353578	0.244678	0.663468	0.604831		up	down	down	up		no	no	no	no
	M	acetyl-CoA carboxylase	ACCase	CRYCO00045968	0.15315	-0.178735	0.144077	-0.0320281		12.9333	15.77	13.2667	15.2933	13.7467		0.134208	0.105265	0.112562	0.749382		0.274608	0.222881	0.268433	0.878842		up	down	up	down		no	no	no	no
	S	acetyl-CoA carboxylase	ACCase	CRYCO00045968	0.143911	0.0257449	0.181054	0.0485551		12.9333	15.47	14.19	16.0867	13.9333		0.113951	0.799267	0.0563905	0.620269		0.267482	0.891461	0.161033	0.781467		up	up	up	up		no	no	no	no
	G	acetyl-CoA carboxylase	ACCase	CRYCO00023433	0.0733812	0.654153	0.54055	0.340371		12.9933	16.2633	23.8533	23.41	19.7933		0.607587	0.000113496	9.50756e-05	0.0174223		0.74202	0.00111396	0.00119098	0.0963702		up	up	up	up		no	no	no	no
	M	acetyl-CoA carboxylase	ACCase	CRYCO00023433	0.246689	0.22616	0.402383	0.155267		12.9933	17.8367	18.4	19.73	16.2267		0.0787709	0.10329	0.00218224	0.29793		0.185975	0.219819	0.012355	0.540212		up	up	up	up		no	no	no	no
	S	acetyl-CoA carboxylase	ACCase	CRYCO00023433	0.250726	0.257791	0.412387	0.192701		12.9933	18.17	17.5233	19.26	15.9067		0.0643351	0.0629732	0.00266897	0.186188		0.178074	0.168477	0.0144604	0.37664		up	up	up	up		no	no	no	no
	G	acetyl-CoA carboxylase	ACCase	CRYCO00013930	0.0945854	-0.166827	0.0846187	-0.33961		11.84	14.3233	11.64	14.4633	9.99667		0.641149	0.457101	0.674569	0.113339		0.768114	0.654352	0.853724	0.339949		up	down	up	down		no	no	no	no
	M	acetyl-CoA carboxylase	ACCase	CRYCO00013930	0.0495233	0.116321	0.0326868	-0.193471		11.84	14.0833	14.8433	13.4767	10.3933		0.808789	0.558623	0.873862	0.367631		0.892695	0.710641	0.938251	0.609717		up	up	up	down		no	no	no	no
	S	acetyl-CoA carboxylase	ACCase	CRYCO00013930	-0.0259089	0.0468779	0.228103	-0.0987441		11.84	13.0733	13.7433	15.6467	10.8433		0.900194	0.816511	0.248927	0.659376		0.950675	0.901916	0.452727	0.808488		down	up	up	down		no	no	no	no
	G	acetyl-CoA carboxylase	ACCase	CRYCO00047413	0.0294431	-0.394116	-0.250584	-0.280428		22.7167	24.32	17.98	21.86	20.3833		0.70912	0.00106992	0.00722411	0.00773497		0.818559	0.00714092	0.0431053	0.0525386		up	down	down	down		no	no	no	no
	M	acetyl-CoA carboxylase	ACCase	CRYCO00047413	-0.0708828	-0.362125	-0.260166	-0.124653		22.7167	22.3633	19.04	20.5667	21.84		0.39734	2.586e-05	0.00129489	0.178306		0.579009	0.000205488	0.00795455	0.397651		down	down	down	down		no	no	no	no
	S	acetyl-CoA carboxylase	ACCase	CRYCO00047413	-0.0437662	-0.297343	-0.185995	-0.119937		22.7167	23.2	19.49	22.29	20.8767		0.568874	0.000651492	0.0263487	0.146661		0.742875	0.00432107	0.0913614	0.321613		down	down	down	down		no	no	no	no
	G	acetyl-CoA carboxylase	ACCase	CRYCO00062833	-0.149657	-0.0858499	0.0179745	0.0295073		61.91	47.27	51.0133	66.8	75.6867		0.237162	0.544564	0.894182	0.824504		0.389979	0.723289	0.959244	0.930951		down	down	up	up		no	no	no	no
	M	acetyl-CoA carboxylase	ACCase	CRYCO00062833	-0.126738	-0.037337	0.122869	0.0210651		61.91	54.4967	56.9	60.01	54.4667		0.322015	0.771462	0.303818	0.871213		0.50499	0.865737	0.521084	0.943066		down	down	up	up		no	no	no	no
	S	acetyl-CoA carboxylase	ACCase	CRYCO00062833	-0.0962922	-0.20626	0.156104	-0.0551652		61.91	59.3433	38.8633	51.8467	56.32		0.449289	0.104601	0.208552	0.677488		0.648875	0.243178	0.403699	0.820533		down	down	up	down		no	no	no	no
	G	acetyl-CoA carboxylase	ACCase	CRYCO00072214	-0.341636	-0.745863	-0.442547	-0.363412		27.1	24.1567	17.8733	23.0067	22.8833		0.00781964	7.66494e-06	0.00135284	0.00761666		0.0269632	0.000111049	0.0112997	0.0519275		down	down	down	down		no	no	no	no
	M	acetyl-CoA carboxylase	ACCase	CRYCO00072214	-0.262913	-0.845036	-0.585011	-0.283686		27.1	25.5933	17.48	20.1133	22.91		0.0441409	1.07243e-09	4.02051e-05	0.03091		0.120242	2.15566e-08	0.000387953	0.121571		down	down	down	down		no	no	no	no
	S	acetyl-CoA carboxylase	ACCase	CRYCO00072214	-0.333678	-0.559251	-0.39293	-0.36302		27.1	24.0333	20.3467	23.36	20.97		0.0160259	4.24914e-05	0.00256668	0.00770526		0.0629146	0.00041523	0.0139932	0.0374693		down	down	down	down		no	no	no	no
	G	acetyl-CoA carboxylase	ACCase	CRYCO00077779	-0.267244	-0.324967	-0.143372	-0.213133		18.4733	17.48	16.4767	20.0333	17.66		0.0237996	0.0311935	0.27181	0.0805948		0.0670422	0.102293	0.535701	0.27448		down	down	down	down		no	no	no	no
	M	acetyl-CoA carboxylase	ACCase	CRYCO00077779	-0.40866	-0.38576	-0.0104653	-0.0611684		18.4733	14.1933	16.5367	21.14	20.8		0.000857004	0.0018939	0.9255	0.621962		0.00506329	0.00862688	0.964885	0.803543		down	down	down	down		no	no	no	no
	S	acetyl-CoA carboxylase	ACCase	CRYCO00077779	-0.525957	-0.254538	-0.174145	-0.120253		18.4733	13.9033	17.6633	20.66	17.5		1.15277e-05	0.0436083	0.142111	0.316673		0.000150131	0.128223	0.311187	0.527665		down	down	down	down		no	no	no	no
	G	acetyl-CoA/propionyl-CoA carboxylase	ACCase	CRYCO00061704	0.197452	-0.385902	-0.30901	-0.497745		210.483	236.873	161.217	184.043	172.387		0.00350051	3.16366e-05	3.88211e-05	1.39268e-09		0.0138429	0.000379117	0.000541844	6.16655e-08		up	down	down	down		no	no	no	no
	M	acetyl-CoA/propionyl-CoA carboxylase	ACCase	CRYCO00061704	-0.434058	-0.979955	-1.99465	-2.12848		210.483	171.803	126.25	59.6167	55.0533		1.4914e-10	3.64195e-36	6.90994e-214	8.57784e-180		5.14382e-09	1.62294e-33	1.12572e-209	5.13234e-176		down	down	down	down		no	no	yes	yes
	S	acetyl-CoA/propionyl-CoA carboxylase	ACCase	CRYCO00061704	-0.421958	-1.00661	-1.71862	-2.02372		210.483	168.557	112.843	72.43	62.71		8.45587e-13	9.00579e-49	6.50953e-144	7.38867e-200		5.01308e-11	8.13138e-46	3.89408e-140	7.21828e-196		down	down	down	down		no	yes	yes	yes
	G	[acyl-carrier-protein] S-malonyltransferase	fabD	CRYCO00025468	0.125839	0.0389003	-0.147559	-0.110474		31.0067	37.0567	33.8567	33.4933	32.7767		0.198806	0.744538	0.191677	0.288528		0.342813	0.860879	0.437224	0.577813		up	up	down	down		no	no	no	no
	M	[acyl-carrier-protein] S-malonyltransferase	fabD	CRYCO00025468	0.0630849	-0.415079	-0.478542	-0.267798		31.0067	36.7033	27.0667	24.3333	28.4867		0.550944	4.6686e-05	1.09065e-06	0.0105088		0.710592	0.000343926	1.52386e-05	0.0541749		up	down	down	down		no	no	no	no
	S	[acyl-carrier-protein] S-malonyltransferase	fabD	CRYCO00025468	0.0881943	-0.30188	-0.451221	-0.209659		31.0067	36.5767	27.1133	26.0933	28.1867		0.363589	0.00220502	8.17552e-06	0.0399741		0.572459	0.0119244	9.71581e-05	0.129776		up	down	down	down		no	no	no	no
	G	[acyl-carrier-protein] S-malonyltransferase	fabD	CRYCO00059477	0.130018	-0.14587	0.0217314	0.165762		21.9367	27.56	21.93	24.89	24.79		0.649124	0.638794	0.937992	0.533173		0.774205	0.791351	0.976351	0.779626		up	down	up	up		no	no	no	no
	M	[acyl-carrier-protein] S-malonyltransferase	fabD	CRYCO00059477	-0.553399	-0.57575	-0.376915	0.274963		21.9367	18.2733	17.1833	19.07	24.12		0.0780601	0.0546731	0.193106	0.357122		0.18469	0.135509	0.389495	0.599627		down	down	down	up		no	no	no	no
	S	[acyl-carrier-protein] S-malonyltransferase	fabD	CRYCO00059477	-0.461083	-1.10987	-0.802962	-0.118735		21.9367	18.9967	12.4433	14.3133	18.5167		0.122223	0.0010975	0.0106305	0.676687		0.281011	0.00672902	0.0447678	0.819998		down	down	down	down		no	yes	no	no
	G	[acyl-carrier-protein] S-malonyltransferase	fabD	CRYCO00059478	0.0601434	0.0631811	0.0844392	0.232472		26.17	30.7267	30.1567	32.0733	33.5467		0.600409	0.633066	0.480596	0.0569369		0.736772	0.787454	0.727699	0.218425		up	up	up	up		no	no	no	no
	M	[acyl-carrier-protein] S-malonyltransferase	fabD	CRYCO00059478	-0.0722217	-0.427992	-0.173631	0.0731324		26.17	27.9467	22.4767	25.6967	28.59		0.537215	0.000462558	0.12205	0.54245		0.699698	0.00257025	0.28416	0.751865		down	down	down	up		no	no	no	no
	S	[acyl-carrier-protein] S-malonyltransferase	fabD	CRYCO00059478	-0.050758	-0.627968	-0.451488	-0.185091		26.17	28	18.5867	21.5333	23		0.644996	5.57785e-07	0.000181515	0.130284		0.796297	9.11931e-06	0.00147821	0.297424		down	down	down	down		no	no	no	no
	G	[acyl-carrier-protein] S-malonyltransferase	fabD	CRYCO0009678	0.3519	0.316694	-0.137768	-0.676074		20.86	29.9033	28.5467	21.8567	14.1067		0.0124085	0.0488743	0.376661	2.56091e-05		0.0394625	0.142844	0.640747	0.00044966		up	up	down	down		no	no	no	no
	M	[acyl-carrier-protein] S-malonyltransferase	fabD	CRYCO0009678	-0.0351368	-0.677593	-1.50379	-1.978		20.86	23.0067	14.9967	8.14667	5.42667		0.809896	1.54542e-05	6.57936e-16	5.89985e-24		0.893372	0.000130754	3.25795e-14	7.97746e-22		down	down	down	down		no	no	yes	yes
	S	[acyl-carrier-protein] S-malonyltransferase	fabD	CRYCO0009678	0.0574337	-0.874478	-1.17864	-1.8165		20.86	24.1067	12.53	10.38	5.84333		0.683654	2.78059e-07	1.56015e-12	3.24741e-21		0.821648	4.87407e-06	6.03101e-11	3.22411e-19		up	down	down	down		no	no	yes	yes
	G	fatty acid synthase	FAS2	CRYCO00067393	0.116147	-0.515958	-0.135711	-0.00275489		20.9267	25.8567	16.37	22.2433	22.9333		0.731432	0.0189625	0.513616	0.994171		0.833714	0.0699947	0.752575	0.998081		up	down	down	down		no	no	no	no
	M	fatty acid synthase	FAS2	CRYCO00067393	0.0658007	-0.201214	-0.630694	-0.231948		20.9267	24.8233	21.2733	15.0967	18.75		0.859829	0.53922	0.0681626	0.509779		0.925212	0.69499	0.188224	0.728331		up	down	down	down		no	no	no	no
	S	fatty acid synthase	FAS2	CRYCO00067393	0.13363	-0.0325249	-0.423206	-0.180865		20.9267	25.6933	22.6533	17.87	18.6133		0.6977	0.934668	0.245764	0.600602		0.830807	0.967758	0.449136	0.768258		up	down	down	down		no	no	no	no
	G	fatty acid synthase	FAS2	CRYCO00067396	1.15481	0.245058	0.125407	-0.285755		7.66667	16.78	9.48667	9.20333	7.3		4.34e-57	0.0557451	0.254972	0.00111954		1.23e-53	0.157079	0.517221	0.0114267		up	up	up	down		yes	no	no	no
	M	fatty acid synthase	FAS2	CRYCO00067396	0.526155	0.330265	-0.400147	-0.124174		7.66667	11.17	10.33	6.44333	8.09		6.76959e-06	0.000746756	2.95557e-07	0.176165		7.83617e-05	0.00390058	4.63875e-06	0.394365		up	up	down	down		no	no	no	no
	S	fatty acid synthase	FAS2	CRYCO00067396	0.386187	-0.0733802	-0.394594	-0.317714		7.66667	10.8067	8.06	6.95333	6.88333		2.45096e-07	0.377409	1.54216e-05	0.000287511		4.98884e-06	0.577789	0.000171915	0.00257879		up	down	down	down		no	no	no	no
	G	fatty acid synthase	FAS2	CRYCO00067397	-0.311843	-0.807482	-0.726108	-0.217779		18.61	17.18	12.0233	13.29	17.7567		0.519239	0.114	0.133206	0.70924		0.670828	0.260972	0.350268	0.877782		down	down	down	down		no	no	no	no
	M	fatty acid synthase	FAS2	CRYCO00067397	-0.491843	-0.641394	-0.704936	-0.0163308		18.61	14.9267	14.0267	12.8333	19.8067		0.334773	0.180611	0.159453	0.974519		0.518345	0.329713	0.342235	0.990795		down	down	down	down		no	no	no	no
	S	fatty acid synthase	FAS2	CRYCO00067397	-0.227017	-0.368712	-0.465776	0.436526		18.61	17.8167	15.9	15.5467	25.76		0.638904	0.466036	0.355149	0.405269		0.7921	0.656009	0.566911	0.611922		down	down	down	up		no	no	no	no
	G	fatty acid synthase	FAS	CRYCO00043934	0.424912	0.453651	0.389484	0.339541		14.4767	21.7	21.47	21.7567	19.8067		0.000999839	0.00229544	0.00524643	0.0142981		0.00479548	0.0132864	0.0336747	0.0835037		up	up	up	up		no	no	no	no
	M	fatty acid synthase	FAS	CRYCO00043934	0.407677	0.422374	0.427453	0.181065		14.4767	21.47	21.99	21.4433	16.98		0.00201078	0.00115159	0.00113835	0.205035		0.0102515	0.00563932	0.00712	0.433107		up	up	up	up		no	no	no	no
	S	fatty acid synthase	FAS	CRYCO00043934	0.228272	0.452001	0.488815	0.260506		14.4767	18.71	21.6667	22.64	16.9567		0.0766659	0.000493226	0.000143823	0.0677369		0.202021	0.00342617	0.00121072	0.18872		up	up	up	up		no	no	no	no
	G	mitochondrial enoyl-[acyl-carrier protein] reductase / trans-2-enoyl-CoA reductase	MECR	CRYCO00015862	0.734418	0.607974	0.523083	0.120341		12.0833	22.5533	20.22	19.9933	14.26		4.42212e-07	0.00020656	0.000848429	0.471932		5.50774e-06	0.00183784	0.00765376	0.735736		up	up	up	up		no	no	no	no
	M	mitochondrial enoyl-[acyl-carrier protein] reductase / trans-2-enoyl-CoA reductase	MECR	CRYCO00015862	0.539872	0.384838	0.432483	-0.17277		12.0833	19.6633	18.1233	17.99	11.1		0.000817242	0.0139585	0.00381984	0.377884		0.0048601	0.0455785	0.0196558	0.618958		up	up	up	down		no	no	no	no
	S	mitochondrial enoyl-[acyl-carrier protein] reductase / trans-2-enoyl-CoA reductase	MECR	CRYCO00015862	0.589379	0.243689	0.487464	-0.153411		12.0833	20.1267	15.6633	19.0067	10.8		0.000103811	0.133932	0.00146039	0.366211		0.000993586	0.289118	0.00878787	0.575427		up	up	up	down		no	no	no	no
	G	enoyl-CoA hydratase	ECH	CRYCO00046821	-0.328887	-0.253887	-0.91115	-1.92959		30.8933	27.6533	28.5033	18.8667	8.55		2.74254e-05	0.00912474	8.35546e-24	9.05231e-102		0.000214988	0.0398998	1.74779e-21	4.14849e-98		down	down	down	down		no	no	no	yes
	M	enoyl-CoA hydratase	ECH	CRYCO00046821	-0.41535	-0.467421	-0.553173	-0.535697		30.8933	25.7567	25.6967	23.0667	22.2233		2.30275e-07	7.77068e-09	4.19719e-14	3.66525e-11		3.98653e-06	1.34106e-07	1.73255e-12	1.5471e-09		down	down	down	down		no	no	no	no
	S	enoyl-CoA hydratase	ECH	CRYCO00046821	-0.387723	-0.372636	-0.531814	-0.410094		30.8933	25.9133	25.7967	23.8733	23.0833		2.00342e-07	1.03867e-06	3.60321e-11	6.50357e-08		4.17709e-06	1.59003e-05	1.17067e-09	1.52535e-06		down	down	down	down		no	no	no	no
	G	enoyl-CoA hydratase	ECH	CRYCO00069166	0.101524	0.0547106	-0.206534	0.469734		19.4733	23.8567	22.5133	18.78	27.3733		0.709391	0.851061	0.474236	0.0660443		0.818799	0.923207	0.72303	0.240767		up	up	down	up		no	no	no	no
	M	enoyl-CoA hydratase	ECH	CRYCO00069166	0.071237	0.182013	0.250569	0.668919		19.4733	24.6267	25.6467	26.08	28.19		0.803672	0.494958	0.329564	0.006598		0.88961	0.658335	0.547392	0.0378999		up	up	up	up		no	no	no	no
	S	enoyl-CoA hydratase	ECH	CRYCO00069166	0.31113	0.0995882	0.261586	0.709079		19.4733	28.4567	25.4167	26.37	29.27		0.226358	0.726219	0.325652	0.00795294		0.424159	0.845477	0.537423	0.0383719		up	up	up	up		no	no	no	no
	G	enoyl-CoA hydratase	ECH	CRYCO00033782	-0.371663	-0.220175	-0.333296	-0.227019		47.0633	40.78	44.53	43.08	43.7067		5.3e-05	0.0965039	0.0036677	0.0265572		0.000385034	0.232565	0.0253193	0.12964		down	down	down	down		no	no	no	no
	M	enoyl-CoA hydratase	ECH	CRYCO00033782	-0.45855	-0.415025	-0.328331	-0.0308011		47.0633	37.85	40.7033	41.8067	47.7367		2.32046e-06	2.65212e-05	0.00027162	0.746326		3.07415e-05	0.000209907	0.00209486	0.877313		down	down	down	down		no	no	no	no
	S	enoyl-CoA hydratase	ECH	CRYCO00033782	-0.357715	-0.283325	-0.292843	0.22264		47.0633	40.2333	42.1567	43.2833	54.75		0.000118008	0.00424666	0.0019311	0.0310075		0.0011084	0.0205045	0.0110758	0.107672		down	down	down	up		no	no	no	no
	G	enoyl-CoA hydratase	ECH	CRYCO00011063	0.356132	0.128004	-0.151663	-0.301582		17.84	23.3867	19.3333	17.9867	12.8733		0.0347247	0.500839	0.409467	0.111929		0.0907593	0.690005	0.670666	0.337399		up	up	down	down		no	no	no	no
	M	enoyl-CoA hydratase	ECH	CRYCO00011063	0.17857	0.256644	0.0492329	0.0310861		17.84	19.6533	20.99	16.0133	14.4767		0.325701	0.130304	0.771824	0.862205		0.508812	0.25988	0.882513	0.938132		up	up	up	up		no	no	no	no
	S	enoyl-CoA hydratase	ECH	CRYCO00011063	0.246597	0.308593	0.185092	0.145468		17.84	19.2267	22.3633	19.7	18.6		0.139396	0.0702276	0.274626	0.410137		0.307197	0.18217	0.482161	0.616296		up	up	up	up		no	no	no	no
	G	palmitoyl-protein thioesterase	PPT	CRYCO00036563	-0.627461	-0.504296	-0.857019	-1.0168		24.2867	17.64	18.8467	15.4633	13.07		3.9379e-07	0.00695869	4.88852e-11	4.08381e-14		4.96765e-06	0.0322364	2.25163e-09	3.2605e-12		down	down	down	down		no	no	no	yes
	M	palmitoyl-protein thioesterase	PPT	CRYCO00036563	-0.507676	-0.501287	-0.572508	-0.517093		24.2867	19.12	19.75	18.0667	17.67		4.84836e-05	3.37003e-05	1.13237e-06	3.00334e-05		0.000436934	0.000258687	1.57763e-05	0.000413454		up	down	down	down		no	no	no	no
	S	palmitoyl-protein thioesterase	PPT	CRYCO00036563	-0.453901	-0.548087	-0.781717	-0.704795		24.2867	19.6167	18.1833	15.91	14.8833		8.1816e-05	5.71776e-06	3.0101e-10	3.4068e-08		0.000811697	7.24431e-05	8.61053e-09	8.40039e-07		down	down	down	down		no	no	no	no
	G	long-chain acyl-CoA synthetase	ACSL	CRYCO00051490	-0.111929	-0.60918	-0.41987	-0.236581		92.0933	95.7367	67.2733	78.27	80.7067		0.165902	3.72099e-07	9.40651e-06	0.00980921		0.300665	8.14433e-06	0.000154471	0.0629867		down	down	down	down		no	no	no	no
	M	long-chain acyl-CoA synthetase	ACSL	CRYCO00051490	-0.195087	-0.354117	-0.86319	-0.877395		92.0933	90.2233	82.34	55.0667	50.7233		0.0352248	4.77812e-05	1.57811e-24	4.79662e-21		0.100903	0.000351113	1.58051e-22	5.17105e-19		down	down	down	down		no	no	no	no
	S	long-chain acyl-CoA synthetase	ACSL	CRYCO00051490	-0.166576	-0.279589	-0.864745	-0.879557		92.0933	90.9633	84.0767	56.3033	48.93		0.033993	0.000911074	1.85362e-23	1.13724e-23		0.111307	0.00577082	1.99345e-21	1.30707e-21		down	down	down	down		no	no	no	no
	G	long-chain acyl-CoA synthetase	ACSL	CRYCO00051491	-0.0601118	-0.480185	-0.310004	-0.243046		60.7567	65.09	47.8333	56.1233	55.4967		0.558846	0.00012277	0.00816995	0.0665497		0.703774	0.00119204	0.0474832	0.241955		down	down	down	down		no	no	no	no
	M	long-chain acyl-CoA synthetase	ACSL	CRYCO00051491	-0.113209	-0.293991	-0.930639	-1.06299		60.7567	62.4067	56.37	34.98	30.0367		0.291734	0.00700975	5.09541e-17	9.08651e-20		0.472477	0.0257797	2.84609e-15	8.9126e-18		down	down	down	down		no	no	no	yes
	S	long-chain acyl-CoA synthetase	ACSL	CRYCO00051491	-0.168612	-0.322313	-0.973779	-1.24258		60.7567	59.0467	52.4967	34.5433	25.5767		0.100544	0.00260823	5.1148e-17	3.84131e-23		0.244714	0.0137023	3.30771e-15	4.27418e-21		down	down	down	down		no	no	no	yes
	G	long-chain-fatty-acid--CoA ligase	ACSBG	CRYCO00051285	-0.208603	-0.318595	-0.300065	-0.263905		89.9	87.3067	79.4867	84.85	82.5233		0.00139958	0.000429265	0.000198524	0.00048683		0.00637369	0.0033713	0.00223758	0.00573238		down	down	down	down		no	no	no	no
	M	long-chain-fatty-acid--CoA ligase	ACSBG	CRYCO00051285	-0.172197	-0.254107	-0.0215346	0.0707951		89.9	88.3167	86.81	97.85	100.507		0.0150996	0.00032342	0.741774	0.38158		0.0519168	0.00187937	0.86413	0.622823		down	down	down	up		no	no	no	no
	S	long-chain-fatty-acid--CoA ligase	ACSBG	CRYCO00051285	-0.135035	-0.0959847	-0.000805853	0.140596		89.9	89.8633	90.9433	101.05	100.477		0.0287754	0.170675	0.990273	0.0319841		0.097877	0.342596	0.995196	0.110194		down	down	down	up		no	no	no	no
	G	long-chain-fatty-acid--CoA ligase	ACSBG	CRYCO00051291	-0.780541	-0.922489	-0.755227	-0.577067		21.0867	13.8567	12.2533	14.43	15.3333		2.56e-06	2.19986e-05	4.43592e-06	0.000731395		2.65e-05	0.000278579	7.86416e-05	0.0080399		down	down	down	down		no	no	no	no
	M	long-chain-fatty-acid--CoA ligase	ACSBG	CRYCO00051291	-0.305696	-0.234148	-0.136784	-0.214701		21.0867	19.2467	20.6567	21.32	18.6533		0.058197	0.12231	0.358437	0.181677		0.148112	0.248473	0.576163	0.401959		down	down	down	down		no	no	no	no
	S	long-chain-fatty-acid--CoA ligase	ACSBG	CRYCO00051291	-0.246624	-0.194429	-0.257604	-0.229052		21.0867	19.81	20.35	19.8267	17.8433		0.0913329	0.18906	0.0867503	0.141422		0.228334	0.368022	0.219615	0.314001		down	down	down	down		no	no	no	no
	G	long-chain-fatty-acid--CoA ligase	ACSBG	CRYCO00051293	-0.149718	-0.490476	-0.667398	-0.874553		44.0233	44.4733	34.4733	32.12	26.4233		0.0445153	2.19185e-05	6.2498e-14	1.84039e-19		0.110552	0.000277711	4.33253e-12	2.35591e-17		down	down	down	down		no	no	no	no
	M	long-chain-fatty-acid--CoA ligase	ACSBG	CRYCO00051293	-0.127171	-0.11611	-0.0632239	0.0351819		44.0233	44.6233	46.7067	46.42	47.89		0.12222	0.149484	0.399628	0.693411		0.256577	0.287604	0.613926	0.847219		down	down	down	up		no	no	no	no
	S	long-chain-fatty-acid--CoA ligase	ACSBG	CRYCO00051293	-0.167965	0.0273927	-0.0648385	0.0385127		44.0233	42.9733	48.51	47.2633	45.75		0.0213481	0.720817	0.40373	0.621063		0.0779932	0.841988	0.612462	0.782085		down	up	down	up		no	no	no	no
	G	long-chain-fatty-acid--CoA ligase	ACSBG	CRYCO00051298	-0.257341	-0.303983	-0.18058	0.0631848		24.4167	22.9167	21.7967	25.0167	28.08		0.00138635	0.00767729	0.0560203	0.467292		0.00632309	0.0347844	0.19707	0.732364		down	down	down	up		no	no	no	no
	M	long-chain-fatty-acid--CoA ligase	ACSBG	CRYCO00051298	-0.121872	-0.371316	-0.0910759	0.0615682		24.4167	24.8333	21.72	25.28	27.1133		0.171455	1.94829e-05	0.259367	0.530085		0.327753	0.00015933	0.472108	0.743754		down	down	down	up		no	no	no	no
	S	long-chain-fatty-acid--CoA ligase	ACSBG	CRYCO00051298	-0.106642	-0.0856346	-0.016121	0.199243		24.4167	24.8833	24.8767	27.1633	28.4		0.170534	0.327685	0.844116	0.0149875		0.351864	0.528444	0.922931	0.0627006		down	down	down	up		no	no	no	no
	G	long-chain-fatty-acid--CoA ligase	ACSBG	CRYCO00051295	0.181891	0.00502703	0.175951	0.258912		24.2133	36.03	32.18	48.02	28.84		0.0710901	0.967867	0.109865	0.0156635		0.159089	0.984767	0.309247	0.0890715		up	up	up	up		no	no	no	no
	M	long-chain-fatty-acid--CoA ligase	ACSBG	CRYCO00051295	0.192205	0.0234519	0.073482	0.283207		24.2133	41.9567	34.05	28.5	37.83		0.0618722	0.824275	0.462186	0.0144519		0.155339	0.899777	0.668453	0.0691158		up	up	up	up		no	no	no	no
	S	long-chain-fatty-acid--CoA ligase	ACSBG	CRYCO00051295	0.291254	0.26132	0.170178	0.494114		24.2133	47.3967	34.82	38.1133	39.1467		0.00272573	0.00925647	0.0900752	6.67335e-07		0.0152298	0.0384566	0.225537	1.26646e-05		up	up	up	up		no	no	no	no
	G	long-chain-fatty-acid--CoA ligase	ACSBG	CRYCO00051297	-0.28674	-0.314123	-0.371057	-0.419156		47.9267	44.0533	42.4667	42.91	39.4033		0.00023889	0.00161511	3.82685e-05	6.07615e-06		0.00141348	0.0100314	0.000535222	0.000127266		down	down	down	down		no	no	no	no
	M	long-chain-fatty-acid--CoA ligase	ACSBG	CRYCO00051297	-0.300464	-0.300513	-0.031558	-0.00344467		47.9267	43.0667	44.81	51.6333	50.6633		0.000432558	0.000195649	0.686147	0.967964		0.00284449	0.00121257	0.829964	0.988105		down	down	down	down		no	no	no	no
	S	long-chain-fatty-acid--CoA ligase	ACSBG	CRYCO00051297	-0.239587	-0.104359	-0.0244843	0.0392722		47.9267	44.5533	48.26	52.8867	49.7633		0.00124746	0.207787	0.758881	0.62705		0.00803213	0.392324	0.873821	0.786446		down	down	down	up		no	no	no	no
	G	elongation of very long chain fatty acids protein 6	ELOVL6	CRYCO00053264	-0.969484	-0.688823	-0.681738	-0.425079		48.7567	27.9333	33.3433	35.2267	39.95		9.09135e-32	9.16884e-11	1.62994e-12	8.25631e-07		4.05849e-29	4.91482e-09	9.306e-11	2.13286e-05		down	down	down	down		no	no	no	no
	M	elongation of very long chain fatty acids protein 6	ELOVL6	CRYCO00053264	-0.894833	-1.16801	-1.1367	-0.905264		48.7567	29.07	24.9733	24.49	27.5933		2.52765e-26	8.93357e-30	9.27112e-47	5.15398e-25		8.82366e-24	2.25189e-27	3.10354e-44	7.45319e-23		up	down	down	down		no	yes	yes	no
	S	elongation of very long chain fatty acids protein 6	ELOVL6	CRYCO00053264	-0.779175	-0.90891	-1.03351	-0.685063		48.7567	31.2167	28.12	26.7867	30.66		2.80164e-24	2.39503e-28	6.40358e-37	1.60625e-16		8.00369e-22	6.16191e-26	1.53998e-34	1.11449e-14		down	down	down	down		no	no	yes	no
	G	elongation of very long chain fatty acids protein 6	ELOVL6	CRYCO00053527	-0.760382	-0.558123	-0.758186	-0.589633		104.207	69.08	77.86	71.1	75.4467		2.8796e-21	2.24579e-07	4.02555e-17	1.87951e-11		3.74342e-19	5.21093e-06	4.08826e-15	1.09865e-09		down	down	down	down		no	no	no	no
	M	elongation of very long chain fatty acids protein 6	ELOVL6	CRYCO00053527	-0.835096	-0.955606	-0.98343	-0.683482		104.207	65.3033	61.83	58.2567	67.5067		1.36979e-22	1.31476e-26	6.84102e-35	1.17019e-14		2.93616e-20	2.46691e-24	1.24757e-32	7.27432e-13		up	down	down	down		no	no	no	no
	S	elongation of very long chain fatty acids protein 6	ELOVL6	CRYCO00053527	-0.731096	-0.768445	-0.90757	-0.777771		104.207	69.3233	66.8533	62.43	60.7		4.0271e-20	2.87174e-18	3.59834e-27	1.52108e-18		7.31331e-18	2.83934e-16	5.23422e-25	1.25932e-16		down	down	down	down		no	no	no	no
	G	17beta-estradiol 17-dehydrogenase / very-long-chain 3-oxoacyl-CoA reductase	HCDH	CRYCO00060583	-0.356776	-0.233376	-0.472165	-0.141713		55.37	48.8	52.17	46.3933	55.0867		0.000482402	0.0679653	2.93882e-05	0.21141		0.00257823	0.181175	0.000426721	0.488257		down	down	down	down		no	no	no	no
	M	17beta-estradiol 17-dehydrogenase / very-long-chain 3-oxoacyl-CoA reductase	HCDH	CRYCO00060583	-0.444145	-0.65755	-0.626308	-0.639896		55.37	45.5833	40.5667	39.7567	37.3867		4.25796e-05	1.24291e-08	3.73055e-09	2.34619e-08		0.000390936	2.06174e-07	8.09982e-08	6.38809e-07		up	down	down	down		no	no	no	no
	S	17beta-estradiol 17-dehydrogenase / very-long-chain 3-oxoacyl-CoA reductase	HCDH	CRYCO00060583	-0.374474	-0.476521	-0.573145	-0.525374		55.37	47.33	43.5633	42.0133	38.7733		0.000168706	5.00085e-06	1.09978e-07	7.298e-07		0.00150227	6.43655e-05	1.96243e-06	1.37321e-05		down	down	down	down		no	no	no	no
	G	very-long-chain (3R)-3-hydroxyacyl-CoA dehydratase	HADH	CRYCO00052968	-0.368936	-0.0056319	-0.228016	-0.0410616		12.6567	10.8633	13.7467	12.3933	13.1433		0.0920213	0.980955	0.30825	0.849812		0.193787	0.990778	0.575754	0.941503		down	down	down	down		no	no	no	no
	M	very-long-chain (3R)-3-hydroxyacyl-CoA dehydratase	HADH	CRYCO00052968	-0.745406	-0.745228	-0.615858	-0.660572		12.6567	8.45333	8.77333	9.32333	8.35		0.000904296	0.000581262	0.003711	0.00352541		0.00529278	0.0031431	0.0191926	0.0230529		up	down	down	down		no	no	no	no
	S	very-long-chain (3R)-3-hydroxyacyl-CoA dehydratase	HADH	CRYCO00052968	-0.759931	-0.552901	-0.957371	-0.457623		12.6567	8.30667	9.52333	7.32333	9.20333		0.00115964	0.0125863	2.35141e-05	0.0401739		0.00755025	0.0489314	0.000249515	0.130269		down	down	down	down		no	no	no	no
	G	very-long-chain (3R)-3-hydroxyacyl-CoA dehydratase HACD	HADH	CRYCO00014192	-0.0556392	0.109061	0.383165	0.297578		23.2433	25.1667	27.7333	35.3033	31.53		0.527878	0.317616	7.68541e-05	0.00305366		0.677979	0.522983	0.000986195	0.0256306		down	up	up	up		no	no	no	no
	M	very-long-chain (3R)-3-hydroxyacyl-CoA dehydratase HACD	HADH	CRYCO00014192	-0.226836	-0.314203	-0.443699	-0.63782		23.2433	22.0067	21.5667	18.8867	15.9567		0.0158015	0.00110269	8.39855e-07	1.44107e-11		0.0538798	0.0054302	1.19881e-05	6.38098e-10		down	down	down	down		no	no	no	no
	S	very-long-chain (3R)-3-hydroxyacyl-CoA dehydratase HACD	HADH	CRYCO00014192	-0.261731	-0.404292	-0.42146	-0.600713		23.2433	21.3133	19.0233	19.5567	15.5667		0.00212557	7.73345e-06	3.12069e-06	3.40575e-09		0.0124266	9.43365e-05	4.11279e-05	1.00157e-07		down	down	down	down		no	no	no	no
	G	beta-ketoacyl synthase	β-KAS	CRYCO00085169	0.705682	0.594422	0.196048	0.0340386		10.1567	18.76	17.0367	13.53	11.1867		0.000170725	0.00368649	0.338624	0.877147		0.00105917	0.0194903	0.605433	0.951937		up	up	up	up		no	no	no	no
	M	beta-ketoacyl synthase	β-KAS	CRYCO00085169	0.614557	0.433085	0.166665	0.183933		10.1567	17.72	15.7433	12.6867	11.65		0.00134708	0.0257512	0.38968	0.356922		0.0073698	0.0747353	0.605118	0.599416		up	up	up	up		no	no	no	no
	S	beta-ketoacyl synthase	β-KAS	CRYCO00085169	0.705682	0.527761	0.351986	0.367858		10.1567	18.76	16.31	14.49	12.98		0.000170725	0.00554331	0.0698703	0.0618145		0.00105917	0.02547	0.188292	0.177063		up	up	up	up		no	no	no	no
	G	beta-ketoacyl synthase	β-KAS	CRYCO00072391	0.163239	-0.228906	-0.227891	-0.182881		9.83	12.3733	9.26333	9.76667	9.51667		0.205397	0.130927	0.115969	0.194567		0.35121	0.287683	0.320181	0.466398		up	down	down	down		no	no	no	no
	M	beta-ketoacyl synthase	β-KAS	CRYCO00072391	0.0603701	-0.30782	-0.207363	-0.165247		9.83	11.4367	9.15	9.42	9.25333		0.645984	0.0407158	0.108423	0.249352		0.782634	0.107725	0.261304	0.487003		up	down	down	down		no	no	no	no
	S	beta-ketoacyl synthase	β-KAS	CRYCO00072391	0.163239	-0.115104	-0.0888537	-0.0509501		9.83	12.3733	9.88667	10.4467	9.58333		0.205397	0.389	0.50759	0.701867		0.35121	0.58827	0.700688	0.836034		up	down	down	down		no	no	no	no
	G	beta-ketoacyl synthase	β-KAS	CRYCO00054192	-0.0295978	0.094604	0.177598	0.195995		13.4333	10.6233	14.54	16.9533	18.2		0.826114	0.537354	0.199238	0.143445		0.89696	0.718128	0.447297	0.392138		down	up	up	up		no	no	no	no
	M	beta-ketoacyl synthase	β-KAS	CRYCO00054192	0.0849152	0.151263	0.173061	0.0955433		13.4333	12.9333	14.21	15.9667	14.0967		0.542227	0.256117	0.18066	0.509391		0.703368	0.422963	0.372383	0.728075		up	up	up	up		no	no	no	no
	S	beta-ketoacyl synthase	β-KAS	CRYCO00054192	-0.0295978	0.164632	0.217205	0.0869224		13.4333	10.6233	15.97	16.1333	12.7633		0.826114	0.235417	0.0976246	0.541944		0.89696	0.427311	0.239321	0.725031		down	up	up	up		no	no	no	no
Polyketide synthase pathway
	G	ketoacyl synthase	KS	CRYCO00067402	0.527793	0.0210202	0.192438	0.253614		15.2033	24.84	17.17	20.25	19.85		0.000759612	0.90937	0.254592	0.232718		0.00379292	0.955082	0.516735	0.514371		up	up	up	up		no	no	no	no
	M	ketoacyl synthase	KS	CRYCO00067402	-0.155383	-0.242882	-0.83906	-0.453914		15.2033	15.3333	14.9267	9.47	11.67		0.424084	0.144978	2.3285e-06	0.0169902		0.603653	0.281069	3.02346e-05	0.0781672		down	down	down	down		no	no	no	no
	S	ketoacyl synthase	KS	CRYCO00067402	0.00387096	-0.300949	-0.556097	-0.17155		15.2033	16.94	13.5633	11.79	13.61		0.980721	0.0756692	0.00306792	0.374987		0.990842	0.192445	0.0162575	0.583544		up	down	down	down		no	no	no	no
	G	ketoacyl synthase	KS	CRYCO00067393	0.116147	-0.515958	-0.135711	-0.00275489		20.9267	25.8567	16.37	22.2433	22.9333		0.731432	0.0189625	0.513616	0.994171		0.833714	0.0699947	0.752575	0.998081		up	down	down	down		no	no	no	no
	M	ketoacyl synthase	KS	CRYCO00067393	0.0658007	-0.201214	-0.630694	-0.231948		20.9267	24.8233	21.2733	15.0967	18.75		0.859829	0.53922	0.0681626	0.509779		0.925212	0.69499	0.188224	0.728331		up	down	down	down		no	no	no	no
	S	ketoacyl synthase	KS	CRYCO00067393	0.13363	-0.0325249	-0.423206	-0.180865		20.9267	25.6933	22.6533	17.87	18.6133		0.6977	0.934668	0.245764	0.600602		0.830807	0.967758	0.449136	0.768258		up	down	down	down		no	no	no	no
	G	ketoacyl synthase	KS	CRYCO00067396	1.15481	0.245058	0.125407	-0.285755		7.66667	16.78	9.48667	9.20333	7.3		4.34e-57	0.0557451	0.254972	0.00111954		1.23e-53	0.157079	0.517221	0.0114267		up	up	up	down		yes	no	no	no
	M	ketoacyl synthase	KS	CRYCO00067396	0.526155	0.330265	-0.400147	-0.124174		7.66667	11.17	10.33	6.44333	8.09		6.76959e-06	0.000746756	2.95557e-07	0.176165		7.83617e-05	0.00390058	4.63875e-06	0.394365		up	up	down	down		no	no	no	no
	S	ketoacyl synthase	KS	CRYCO00067396	0.386187	-0.0733802	-0.394594	-0.317714		7.66667	10.8067	8.06	6.95333	6.88333		2.45096e-07	0.377409	1.54216e-05	0.000287511		4.98884e-06	0.577789	0.000171915	0.00257879		up	down	down	down		no	no	no	no
	G	ketoacyl synthase	KS	CRYCO00067397	-0.311843	-0.807482	-0.726108	-0.217779		18.61	17.18	12.0233	13.29	17.7567		0.519239	0.114	0.133206	0.70924		0.670828	0.260972	0.350268	0.877782		down	down	down	down		no	no	no	no
	M	ketoacyl synthase	KS	CRYCO00067397	-0.491843	-0.641394	-0.704936	-0.0163308		18.61	14.9267	14.0267	12.8333	19.8067		0.334773	0.180611	0.159453	0.974519		0.518345	0.329713	0.342235	0.990795		down	down	down	down		no	no	no	no
	S	ketoacyl synthase	KS	CRYCO00067397	-0.227017	-0.368712	-0.465776	0.436526		18.61	17.8167	15.9	15.5467	25.76		0.638904	0.466036	0.355149	0.405269		0.7921	0.656009	0.566911	0.611922		down	down	down	up		no	no	no	no
	G	ketoacyl synthase	KS	CRYCO00079006	0.667582	0.951934	0.469952	0.183595		21.0333	32.71	37.9833	28.3033	22.3		6.16e-20	1.69463e-22	3.14572e-08	0.178497		6.94e-18	5.87815e-20	9.06111e-07	0.444549		up	up	up	up		no	no	no	no
	M	ketoacyl synthase	KS	CRYCO00079006	0.59572	0.774351	0.769108	0.903683		21.0333	30.1933	35.2333	33.1867	43.9333		1.72463e-14	6.43964e-22	1.40883e-27	8.36765e-11		1.21101e-12	6.97185e-20	1.6794e-25	3.36576e-09		up	up	up	up		no	no	no	no
	S	ketoacyl synthase	KS	CRYCO00079006	0.502926	0.825265	0.717614	0.650491		21.0333	28.2833	34.0567	32.7767	35.3233		6.43678e-13	4.12027e-28	1.79175e-22	5.58279e-13		3.93054e-11	1.03231e-25	1.80092e-20	2.76575e-11		up	up	up	up		no	no	no	no
	G	ketoacyl synthase	KS	CRYCO00079005	0.838317	0.969505	0.50807	0.397797		26.45	53.6833	57.1667	43.6733	38.3133		3.34e-27	2.73319e-22	1.37535e-08	4.68e-05		8.68e-25	9.08557e-20	4.26144e-07	0.000766163		up	up	up	up		no	no	no	no
	M	ketoacyl synthase	KS	CRYCO00079005	0.757242	0.864329	0.69144	0.819082		26.45	49.8467	55.4867	47.18	49.4833		5.42738e-19	3.01402e-23	1.77304e-19	2.24124e-11		7.18826e-17	3.84731e-21	1.20859e-17	9.69973e-10		up	up	up	up		no	no	no	no
	S	ketoacyl synthase	KS	CRYCO00079005	0.744056	0.922299	0.773496	0.684845		26.45	49.0933	54.32	50.8933	43.13		8.38026e-23	1.35909e-31	1.36171e-22	2.43624e-14		2.03674e-20	4.39444e-29	1.37774e-20	1.37258e-12		up	up	up	up		no	no	no	no
	G	ketoacyl synthase	KS	CRYCO00079007	0.00616595	-0.143837	0.000571978	0.0508941		650.84	771.897	677.927	772.753	745.237		0.928165	0.159049	0.994845	0.521731		0.959442	0.329654	0.9982	0.771942		up	down	up	up		no	no	no	no
	M	ketoacyl synthase	KS	CRYCO00079007	0.0905538	0.1522	0.2774	0.36366		650.84	806.477	859.81	890.277	869.543		0.220142	0.04836	9.94644e-05	1.24179e-06		0.390348	0.123105	0.000861919	2.39726e-05		up	up	up	up		no	no	no	no
	S	ketoacyl synthase	KS	CRYCO00079007	0.0686555	0.294348	0.322783	0.550247		650.84	777.493	892.377	933.17	964.05		0.305096	8.81671e-05	7.2332e-06	7.59288e-13		0.513038	0.000782628	8.70622e-05	3.69412e-11		up	up	up	up		no	no	no	no
	G	ketoacyl synthase	KS	CRYCO00067404	0.257137	1.07322	0.852941	0.829085		277.38	373.837	645.677	568.957	522.553		0.00386706	9.70453e-22	4.96549e-14	1.39e-17		0.0150218	3.03619e-19	3.48764e-12	1.54e-15		up	up	up	up		no	yes	no	no
	M	ketoacyl synthase	KS	CRYCO00067404	0.245842	0.556686	0.66824	0.640348		277.38	371.623	471.45	481.237	433.093		0.00516066	4.49999e-10	1.74895e-15	2.74942e-10		0.0220844	9.68914e-09	8.30693e-14	1.04035e-08		up	up	up	up		no	no	no	no
	S	ketoacyl synthase	KS	CRYCO00067404	0.188509	0.656504	0.460804	0.602881		277.38	350.733	484.473	427.67	405.87		0.0213335	1.86063e-10	5.22686e-07	1.26714e-09		0.0779769	6.35082e-09	8.06389e-06	4.04409e-08		up	up	up	up		no	no	no	no
	G	ketoacyl synthase	KS	CRYCO00067513	0.158026	-0.0289311	-0.225151	-0.0119208		81.0033	101.867	87.2	79.0767	85.79		0.189931	0.836107	0.0929937	0.939792		0.331941	0.91501	0.277648	0.978294		up	down	down	down		no	no	no	no
	M	ketoacyl synthase	KS	CRYCO00067513	0.295253	0.0971075	0.41696	0.682961		81.0033	113.883	99.8833	120.113	129.323		0.0267637	0.427293	0.000380925	3.64845e-06		0.0816082	0.598903	0.00281144	6.34581e-05		up	up	up	up		no	no	no	no
	S	ketoacyl synthase	KS	CRYCO00067513	0.233518	0.320884	0.513504	0.681785		81.0033	107.093	113.62	129.863	126.133		0.0500228	0.00750649	3.62966e-05	7.07649e-08		0.148182	0.0325318	0.000364773	1.64368e-06		up	up	up	up		no	no	no	no
	G	ketoacyl synthase	KS	CRYCO00067375	0.172168	0.642499	0.428218	0.42984		53.7133	69.1433	94.7567	85.72	77.3267		0.0143828	4.994e-08	7.53864e-06	2.8e-08		0.0445067	1.38882e-06	0.000126841	9.73e-07		up	up	up	up		no	no	no	no
	M	ketoacyl synthase	KS	CRYCO00067375	0.1515	0.472697	0.666857	0.575518		53.7133	67.52	88.0733	95.7967	83.7733		0.0485833	1.50886e-08	3.79057e-19	4.39225e-14		0.129464	2.46505e-07	2.50014e-17	2.60197e-12		up	up	up	up		no	no	no	no
	S	ketoacyl synthase	KS	CRYCO00067375	0.118682	0.508549	0.533376	0.702668		53.7133	66.0233	84.7267	89.7633	87.32		0.0824358	2.77966e-11	6.44207e-12	1.59376e-17		0.212791	1.10023e-09	2.30417e-10	1.20699e-15		up	up	up	up		no	no	no	no
	G	ketoacyl synthase	KS	CRYCO00071556	0.0635333	-0.0422576	-0.710149	-1.15216		19.4267	21.8467	19.18	13.9967	9.98667		0.546021	0.739822	1.2006e-08	3.89e-19		0.69344	0.857747	3.75891e-07	4.82e-17		up	down	down	down		no	no	no	yes
	M	ketoacyl synthase	KS	CRYCO00071556	-0.0129122	0.159634	0.191754	0.0670251		19.4267	21.5867	25.3033	26.2833	23.3733		0.907474	0.149075	0.0646306	0.547074		0.950914	0.286992	0.180893	0.755017		down	up	up	up		no	no	no	no
	S	ketoacyl synthase	KS	CRYCO00071556	0.059207	0.200999	-0.0542605	-0.10327		19.4267	21.2967	22.31	21.9833	20.7167		0.569459	0.0649403	0.612526	0.366312		0.74319	0.17245	0.778704	0.575517		up	up	down	down		no	no	no	no
	G	ketoacyl synthase	KS	CRYCO00047991	-0.437366	-0.664954	-0.729986	-0.728539		44.8333	37.1	31.1067	31.3267	29.72		2.14e-08	3.15558e-08	1.09071e-14	1.15e-18		3.53e-07	9.3012e-07	8.28003e-13	1.37e-16		down	down	down	down		no	no	no	no
	M	ketoacyl synthase	KS	CRYCO00047991	-0.434198	-0.370282	-0.440673	-0.325171		44.8333	36.7133	39.8967	36.4433	37.94		1.71734e-07	2.00904e-06	4.91661e-09	6.25222e-05		3.06313e-06	2.10738e-05	1.04978e-07	0.000784872		down	down	down	down		no	no	no	no
	S	ketoacyl synthase	KS	CRYCO00047991	-0.404713	-0.281474	-0.43618	-0.181845		44.8333	37.1333	39.92	37.29	39.9467		8.7407e-08	0.000338526	9.58726e-08	0.0196486		1.99716e-06	0.00248273	1.73335e-06	0.0768005		down	down	down	down		no	no	no	no
	G	ketoacyl synthase	KS	CRYCO00067374	-0.0910918	0.40955	0.170101	0.209045		251.09	263.763	365.973	326	317.73		0.278527	0.000230632	0.103124	0.0284834		0.437566	0.00201871	0.296742	0.135859		down	up	up	up		no	no	no	no
	M	ketoacyl synthase	KS	CRYCO00067374	-0.110493	0.0570068	0.185792	0.155805		251.09	257.43	299.55	313.917	294.447		0.245979	0.537959	0.0326538	0.104466		0.420876	0.694081	0.109301	0.281619		down	up	up	up		no	no	no	no
	S	ketoacyl synthase	KS	CRYCO00067374	-0.0671548	0.180705	0.00913176	0.17848		251.09	262.903	308.3	282.8	286.167		0.403173	0.049398	0.920789	0.0503289		0.608766	0.1408	0.961997	0.152982		down	up	up	up		no	no	no	no
	G	ketoacyl synthase	KS	CRYCO00085169	0.705682	0.594422	0.196048	0.0340386		10.1567	18.76	17.0367	13.53	11.1867		0.000170725	0.00368649	0.338624	0.877147		0.00105917	0.0194903	0.605433	0.951937		up	up	up	up		no	no	no	no
	M	ketoacyl synthase	KS	CRYCO00085169	0.614557	0.433085	0.166665	0.183933		10.1567	17.72	15.7433	12.6867	11.65		0.00134708	0.0257512	0.38968	0.356922		0.0073698	0.0747353	0.605118	0.599416		up	up	up	up		no	no	no	no
	S	ketoacyl synthase	KS	CRYCO00085169	0.459397	0.527761	0.351986	0.367858		10.1567	15.6433	16.31	14.49	12.98		0.0149589	0.00554331	0.0698703	0.0618145		0.0595856	0.02547	0.188292	0.177063		up	up	up	up		no	no	no	no
	G	ketoacyl synthase	KS	CRYCO00072391	0.163239	-0.228906	-0.227891	-0.182881		9.83	12.3733	9.26333	9.76667	9.51667		0.205397	0.130927	0.115969	0.194567		0.35121	0.287683	0.320181	0.466398		up	down	down	down		no	no	no	no
	M	ketoacyl synthase	KS	CRYCO00072391	0.0603701	-0.30782	-0.207363	-0.165247		9.83	11.4367	9.15	9.42	9.25333		0.645984	0.0407158	0.108423	0.249352		0.782634	0.107725	0.261304	0.487003		up	down	down	down		no	no	no	no
	S	ketoacyl synthase	KS	CRYCO00072391	0.0451068	-0.115104	-0.0888537	-0.0509501		9.83	11.19	9.88667	10.4467	9.58333		0.735598	0.389	0.50759	0.701867		0.854754	0.58827	0.700688	0.836034		up	down	down	down		no	no	no	no
	G	ketoacyl synthase	KS	CRYCO00054192	-0.0295978	0.094604	0.177598	0.195995		13.4333	10.6233	14.54	16.9533	18.2		0.826114	0.537354	0.199238	0.143445		0.89696	0.718128	0.447297	0.392138		down	up	up	up		no	no	no	no
	M	ketoacyl synthase	KS	CRYCO00054192	0.0849152	0.151263	0.173061	0.0955433		13.4333	12.9333	14.21	15.9667	14.0967		0.542227	0.256117	0.18066	0.509391		0.703368	0.422963	0.372383	0.728075		up	up	up	up		no	no	no	no
	S	ketoacyl synthase	KS	CRYCO00054192	0.345519	0.164632	0.217205	0.0869224		13.4333	16.3267	15.97	16.1333	12.7633		0.0113462	0.235417	0.0976246	0.541944		0.0479477	0.427311	0.239321	0.725031		up	up	up	up		no	no	no	no
	G	ketoacyl synthase	KS	CRYCO00011019	-0.436647	-1.05724	-1.66215	-1.95691		67.4533	55.96	35.66	24.7033	19.1633		4.78e-10	0.000585001	1.64612e-65	5.65e-94		1.11e-08	0.004353	4.63838e-62	1.62e-90		down	down	down	down		no	yes	yes	yes
	M	ketoacyl synthase	KS	CRYCO00011019	-0.485169	-0.336549	-0.00294293	0.0508301		67.4533	53.4367	61.49	74.2067	74.2233		3.84391e-10	5.86473e-05	0.969504	0.513538		1.22624e-08	0.000420852	0.985811	0.731491		down	down	down	up		no	no	no	no
	S	ketoacyl synthase	KS	CRYCO00011019	-0.48019	-0.254941	0.0236108	0.277131		67.4533	53.13	61.1867	77.1733	82.6967		4.37665e-12	0.00183633	0.738628	0.000470859		2.28423e-10	0.0102718	0.861596	0.00389106		down	down	up	up		no	no	no	no
	G	ketoacyl reducatase	KR	CRYCO00076832	0.564608	0.59491	0.381058	-0.204373		11	18.2467	18.2867	16.6233	10.4767		6.78e-10	0.00077175	0.000271053	0.136028		1.54e-08	0.00545755	0.00291317	0.380068		up	up	up	down		no	no	no	no
	M	ketoacyl reducatase	KR	CRYCO00076832	0.415991	0.755607	0.415659	0.410661		11	16.2467	21.35	16.1833	15.5167		2.45791e-05	4.71414e-13	6.2296e-06	0.000565129		0.000241647	1.64189e-11	7.32592e-05	0.00518606		up	up	up	up		no	no	no	no
	S	ketoacyl reducatase	KR	CRYCO00076832	0.339492	0.504422	0.411319	0.308222		11	15.2733	16.8833	16.4167	13.8133		0.000258523	1.55454e-07	4.79681e-05	0.00261253		0.00216986	2.90136e-06	0.000466114	0.0158764		up	up	up	up		no	no	no	no
	G	dehydrase	DH	CRYCO0009825	-1.67945	-1.18652	-1.33072	-1.10574		4.85	1.71667	2.35667	2.21	2.42333		6.73e-06	0.00304726	0.000169954	0.000889573		6.24e-05	0.0167297	0.00196266	0.00946029		down	down	down	down		yes	yes	yes	yes
	M	dehydrase	DH	CRYCO0009825	-0.688863	-0.759098	-0.771782	-1.10107		4.85	3.44333	3.30667	3.15333	2.29		0.032589	0.0173223	0.0151533	0.00117029		0.095107	0.0543405	0.0602661	0.0095009		down	down	down	down		no	no	no	yes
	S	dehydrase	DH	CRYCO0009825	-0.473507	-0.66325	-0.741485	-1.05575		4.85	3.91	3.41	3.28	2.29		0.121212	0.039544	0.0232073	0.00235881		0.279581	0.119157	0.082815	0.0145886		down	down	down	down		no	no	no	yes
	G	dehydrase	DH	CRYCO00056383	-1.40185	-1.13858	-1.16997	-1.05382		5.72667	2.44667	2.88333	2.95	3.02		2.68e-10	4.80111e-06	4.60367e-08	1.43e-06		6.48e-09	7.46168e-05	1.28287e-06	3.51e-05		down	down	down	down		yes	yes	yes	yes
	M	dehydrase	DH	CRYCO00056383	-0.326728	-0.592126	-0.507091	-0.66314		5.72667	5.11333	4.4	4.47667	3.79667		0.109123	0.00267207	0.00839765	0.000829882		0.236248	0.0115843	0.0374123	0.00715732		down	down	down	down		no	no	no	no
	S	dehydrase	DH	CRYCO00056383	-0.344837	-0.806912	-0.819021	-0.439938		5.72667	5	3.58	3.66	4.24667		0.0693734	0.000161352	5.28887e-05	0.0382661		0.188014	0.00131404	0.00050907	0.12563		down	down	down	down		no	no	no	no
	G	enoyl reductase	ER	CRYCO00031426	-0.313971	-0.317619	-0.435585	-0.360312		113.37	102.147	100.147	97.25	97.16		2.03e-06	0.000956551	4.69875e-07	4.8e-06		2.15e-05	0.00652718	1.05671e-05	0.000103033		down	down	down	down		no	no	no	no
	M	enoyl reductase	ER	CRYCO00031426	-0.889453	-0.795013	-0.473545	-0.191827		113.37	67.6267	75.0767	89.9	105.38		9.10216e-35	7.43981e-26	9.46136e-12	0.00930922		6.95064e-32	1.28485e-23	2.93224e-10	0.0494063		down	down	down	down		no	no	no	no
	S	enoyl reductase	ER	CRYCO00031426	-0.704239	-0.650737	-0.327056	-0.124699		113.37	76.2533	77.99	101.45	105.21		2.22942e-28	4.19079e-21	1.78846e-06	0.0760804		9.07577e-26	5.58624e-19	2.48231e-05	0.204913		down	down	down	down		no	no	no	no
	G	enoyl reductase	ER	CRYCO00012723	0.48334	0.1411	-0.135185	-0.232313		11.9833	18.4667	14.5333	13.0567	11.3133		1.55e-05	0.341332	0.28871	0.0700437		0.000129852	0.547898	0.554695	0.250641		up	up	down	down		no	no	no	no
	M	enoyl reductase	ER	CRYCO00012723	0.349731	0.177306	-0.0450825	-0.00196288		11.9833	16.8633	15.5833	12.7767	13.1833		0.0100024	0.156947	0.697245	0.987134		0.0374618	0.297989	0.83722	0.995352		up	up	down	down		no	no	no	no
	S	enoyl reductase	ER	CRYCO00012723	0.476912	0.113402	0.000221361	0.107886		11.9833	17.9067	13.92	13.3867	12.9233		1.7082e-05	0.339219	0.998487	0.383246		0.000209818	0.540323	0.999237	0.591931		up	up	up	up		no	no	no	no
	G	enoyl reductase	ER	CRYCO00078382	0.480643	0.175033	0.117638	0.0819947		3.87667	6.13667	4.87	4.90333	4.49		0.076316	0.553252	0.673576	0.779716		0.167975	0.729883	0.853318	0.909695		up	up	up	up		no	no	no	no
	M	enoyl reductase	ER	CRYCO00078382	0.343352	0.0967542	0.354498	0.1899		3.87667	5.57667	4.82	5.53667	4.62333		0.22138	0.722953	0.16953	0.492721		0.391804	0.833353	0.356857	0.715166		up	up	up	up		no	no	no	no
	S	enoyl reductase	ER	CRYCO00078382	0.294423	0.283198	0.0109222	0.267355		3.87667	5.31333	5.22333	4.44667	4.67333		0.274287	0.30186	0.968352	0.358447		0.480085	0.501238	0.984585	0.568457		up	up	up	up		no	no	no	no
	G	enoyl reductase	ER	CRYCO00082433	0.090326	0.0117882	-0.262695	-0.063239		16.1733	19.34	17.9867	15.6167	16.9767		0.39138	0.933217	0.0317856	0.571602		0.555446	0.967143	0.13225	0.80344		up	up	down	down		no	no	no	no
	M	enoyl reductase	ER	CRYCO00082433	-0.0403916	-0.354965	-0.276825	-0.094625		16.1733	17.5133	14.5533	14.75	15.9567		0.710767	0.00244023	0.00990116	0.388369		0.828731	0.0107192	0.0427746	0.629155		down	down	down	down		no	no	no	no
	S	enoyl reductase	ER	CRYCO00082433	0.089387	-0.199666	-0.174065	-0.0180679		16.1733	18.9667	15.3167	16.1633	16.0767		0.38145	0.0804381	0.120595	0.872777		0.589194	0.201438	0.277894	0.935642		up	down	down	down		no	no	no	no
	G	enoyl reductase	ER	CRYCO00011652	0.686675	0.424074	0.0344416	0.0554502		4.61333	8.37	6.84	5.44	5.22		0.000866365	0.0778467	0.886065	0.8117		0.00424311	0.199666	0.955344	0.925068		up	up	up	up		no	no	no	no
	M	enoyl reductase	ER	CRYCO00011652	0.405616	0.183051	0.0739839	0.119219		4.61333	7.05	6.04333	5.38667	5.2		0.0851693	0.414728	0.734513	0.610018		0.197055	0.586775	0.859847	0.796572		up	up	up	up		no	no	no	no
	S	enoyl reductase	ER	CRYCO00011652	0.551685	0.0185605	-0.132186	0.113281		4.61333	7.51	5.13667	4.75333	4.97667		0.00718496	0.936858	0.564715	0.633879		0.0332537	0.968783	0.744584	0.791045		up	up	down	up		no	no	no	no
					Log2fc					TPM						pvalue					padjust					regulate					significant
Pathway	Group	Gene name	Abbreviation	gene_id	6h	12h	24h	48h		0h	6h	12h	24h	48h		6h	12h	24h	48h		6h	12h	24h	48h		6h	12h	24h	48h		6h	12h	24h	48h
Fatty acid degradation
	G	very-long-chain (3R)-3-hydroxyacyl-CoA dehydratase	HADH	CRYCO00014192	-0.0556392	0.109061	0.383165	0.297578		23.2433	25.1667	27.7333	35.3033	31.53		0.527878	0.317616	7.68541e-05	0.00305366		0.677979	0.522983	0.000986195	0.0256306		down	up	up	up		no	no	no	no
	M	very-long-chain (3R)-3-hydroxyacyl-CoA dehydratase	HADH	CRYCO00014192	-0.226836	-0.314203	-0.443699	-0.63782		23.2433	22.0067	21.5667	18.8867	15.9567		0.0158015	0.00110269	8.39855e-07	1.44107e-11		0.0538798	0.0054302	1.19881e-05	6.38098e-10		down	down	down	down		no	no	no	no
	S	very-long-chain (3R)-3-hydroxyacyl-CoA dehydratase	HADH	CRYCO00014192	-0.261731	-0.404292	-0.42146	-0.600713		23.2433	21.3133	19.0233	19.5567	15.5667		0.00212557	7.73345e-06	3.12069e-06	3.40575e-09		0.0124266	9.43365e-05	4.11279e-05	1.00157e-07		down	down	down	down		no	no	no	no
	G	long-chain-fatty-acid--CoA ligase ACSBG	ACSBG	CRYCO0004959	-0.12798	-0.429142	-0.666851	-1.01216		25.06	25.5667	20.35	18.22	13.63		0.305969	0.00271256	1.01765e-05	2.24948e-08		0.467563	0.0152168	0.000166034	7.9852e-07		down	down	down	down		no	no	no	yes
	M	long-chain-fatty-acid--CoA ligase ACSBG	ACSBG	CRYCO0004959	-0.0142963	-0.12678	-0.0456804	-0.213667		26.06	27.37	26.2567	26.67	22.79		0.911907	0.322431	0.715589	0.172915		0.953347	0.496284	0.848567	0.389825		down	down	down	down		no	no	no	no
	S	long-chain-fatty-acid--CoA ligase ACSBG	ACSBG	CRYCO0004959	-0.125124	0.0646508	0.109944	-0.262028		27.06	25.11	28.1967	30.18	21.0467		0.320968	0.608324	0.396953	0.0716749		0.529233	0.766662	0.606515	0.19636		down	up	up	down		no	no	no	no
	G	long-chain-fatty-acid--CoA ligase ACSBG	ACSBG	CRYCO0004963	-0.141748	-0.543655	-0.65628	-0.88488		37.5767	37.4633	27.1467	26.08	20		0.246475	0.000187975	1.71326e-06	2.92716e-09		0.400785	0.00170319	3.35247e-05	1.22957e-07		down	down	down	down		no	no	no	no
	M	long-chain-fatty-acid--CoA ligase ACSBG	ACSBG	CRYCO0004963	-0.223433	-0.0524335	-0.0219191	-0.168649		37.5767	36.16	39.13	38.81	31.77		0.0802441	0.67209	0.855079	0.19499		0.188703	0.797571	0.928464	0.419847		down	down	down	down		no	no	no	no
	S	long-chain-fatty-acid--CoA ligase ACSBG	ACSBG	CRYCO0004963	-0.158893	0.0396265	-0.00500828	0.0607204		38.5767	36.58	40.6433	39.6433	36.99		0.196453	0.750112	0.968033	0.638645		0.386954	0.860915	0.984491	0.794315		down	up	down	up		no	no	no	no
	G	long-chain-fatty-acid--CoA ligase	ACSBG	CRYCO00051285	-0.208603	-0.318595	-0.300065	-0.263905		89.9	87.3067	79.4867	84.85	82.5233		0.00139958	0.000429265	0.000198524	0.00048683		0.00637369	0.0033713	0.00223758	0.00573238		down	down	down	down		no	no	no	no
	M	long-chain-fatty-acid--CoA ligase	ACSBG	CRYCO00051285	-0.172197	-0.254107	-0.0215346	0.0707951		89.9	88.3167	86.81	97.85	100.507		0.0150996	0.00032342	0.741774	0.38158		0.0519168	0.00187937	0.86413	0.622823		down	down	down	up		no	no	no	no
	S	long-chain-fatty-acid--CoA ligase	ACSBG	CRYCO00051285	-0.135035	-0.0959847	-0.000805853	0.140596		89.9	89.8633	90.9433	101.05	100.477		0.0287754	0.170675	0.990273	0.0319841		0.097877	0.342596	0.995196	0.110194		down	down	down	up		no	no	no	no
	G	long-chain-fatty-acid--CoA ligase	ACSBG	CRYCO00051291	-0.780541	-0.922489	-0.755227	-0.577067		21.0867	13.8567	12.2533	14.43	15.3333		2.56e-06	2.19986e-05	4.43592e-06	0.000731395		2.65e-05	0.000278579	7.86416e-05	0.0080399		down	down	down	down		no	no	no	no
	M	long-chain-fatty-acid--CoA ligase	ACSBG	CRYCO00051291	-0.305696	-0.234148	-0.136784	-0.214701		21.0867	19.2467	20.6567	21.32	18.6533		0.058197	0.12231	0.358437	0.181677		0.148112	0.248473	0.576163	0.401959		down	down	down	down		no	no	no	no
	S	long-chain-fatty-acid--CoA ligase	ACSBG	CRYCO00051291	-0.246624	-0.194429	-0.257604	-0.229052		21.0867	19.81	20.35	19.8267	17.8433		0.0913329	0.18906	0.0867503	0.141422		0.228334	0.368022	0.219615	0.314001		down	down	down	down		no	no	no	no
	G	long-chain-fatty-acid--CoA ligase	ACSBG	CRYCO00051293	-0.149718	-0.490476	-0.667398	-0.874553		44.0233	44.4733	34.4733	32.12	26.4233		0.0445153	2.19185e-05	6.2498e-14	1.84039e-19		0.110552	0.000277711	4.33253e-12	2.35591e-17		down	down	down	down		no	no	no	no
	M	long-chain-fatty-acid--CoA ligase	ACSBG	CRYCO00051293	-0.127171	-0.11611	-0.0632239	0.0351819		44.0233	44.6233	46.7067	46.42	47.89		0.12222	0.149484	0.399628	0.693411		0.256577	0.287604	0.613926	0.847219		down	down	down	up		no	no	no	no
	S	long-chain-fatty-acid--CoA ligase	ACSBG	CRYCO00051293	-0.167965	0.0273927	-0.0648385	0.0385127		44.0233	42.9733	48.51	47.2633	45.75		0.0213481	0.720817	0.40373	0.621063		0.0779932	0.841988	0.612462	0.782085		down	up	down	up		no	no	no	no
	G	long-chain-fatty-acid--CoA ligase	ACSBG	CRYCO00051298	-0.257341	-0.303983	-0.18058	0.0631848		24.4167	22.9167	21.7967	25.0167	28.08		0.00138635	0.00767729	0.0560203	0.467292		0.00632309	0.0347844	0.19707	0.732364		down	down	down	up		no	no	no	no
	M	long-chain-fatty-acid--CoA ligase	ACSBG	CRYCO00051298	-0.121872	-0.371316	-0.0910759	0.0615682		24.4167	24.8333	21.72	25.28	27.1133		0.171455	1.94829e-05	0.259367	0.530085		0.327753	0.00015933	0.472108	0.743754		down	down	down	up		no	no	no	no
	S	long-chain-fatty-acid--CoA ligase	ACSBG	CRYCO00051298	-0.106642	-0.0856346	-0.016121	0.199243		24.4167	24.8833	24.8767	27.1633	28.4		0.170534	0.327685	0.844116	0.0149875		0.351864	0.528444	0.922931	0.0627006		down	down	down	up		no	no	no	no
	G	long-chain-fatty-acid--CoA ligase	ACSBG	CRYCO00051295	0.181891	0.00502703	0.175951	0.258912		24.2133	36.03	32.18	48.02	28.84		0.0710901	0.967867	0.109865	0.0156635		0.159089	0.984767	0.309247	0.0890715		up	up	up	up		no	no	no	no
	M	long-chain-fatty-acid--CoA ligase	ACSBG	CRYCO00051295	0.192205	0.0234519	0.073482	0.283207		24.2133	41.9567	34.05	28.5	37.83		0.0618722	0.824275	0.462186	0.0144519		0.155339	0.899777	0.668453	0.0691158		up	up	up	up		no	no	no	no
	S	long-chain-fatty-acid--CoA ligase	ACSBG	CRYCO00051295	0.291254	0.26132	0.170178	0.494114		24.2133	47.3967	34.82	38.1133	39.1467		0.00272573	0.00925647	0.0900752	6.67335e-07		0.0152298	0.0384566	0.225537	1.26646e-05		up	up	up	up		no	no	no	no
	G	long-chain-fatty-acid--CoA ligase	ACSBG	CRYCO00051297	-0.28674	-0.314123	-0.371057	-0.419156		47.9267	44.0533	42.4667	42.91	39.4033		0.00023889	0.00161511	3.82685e-05	6.07615e-06		0.00141348	0.0100314	0.000535222	0.000127266		down	down	down	down		no	no	no	no
	M	long-chain-fatty-acid--CoA ligase	ACSBG	CRYCO00051297	-0.300464	-0.300513	-0.031558	-0.00344467		47.9267	43.0667	44.81	51.6333	50.6633		0.000432558	0.000195649	0.686147	0.967964		0.00284449	0.00121257	0.829964	0.988105		down	down	down	down		no	no	no	no
	S	long-chain-fatty-acid--CoA ligase	ACSBG	CRYCO00051297	-0.239587	-0.104359	-0.0244843	0.0392722		47.9267	44.5533	48.26	52.8867	49.7633		0.00124746	0.207787	0.758881	0.62705		0.00803213	0.392324	0.873821	0.786446		down	down	down	up		no	no	no	no
	G	long-chain acyl-CoA synthetase	ACSL	CRYCO00051490	-0.111929	-0.60918	-0.41987	-0.236581		92.0933	95.7367	67.2733	78.27	80.7067		0.165902	3.72099e-07	9.40651e-06	0.00980921		0.300665	8.14433e-06	0.000154471	0.0629867		down	down	down	down		no	no	no	no
	M	long-chain acyl-CoA synthetase	ACSL	CRYCO00051490	-0.195087	-0.354117	-0.86319	-0.877395		92.0933	90.2233	82.34	55.0667	50.7233		0.0352248	4.77812e-05	1.57811e-24	4.79662e-21		0.100903	0.000351113	1.58051e-22	5.17105e-19		down	down	down	down		no	no	no	no
	S	long-chain acyl-CoA synthetase	ACSL	CRYCO00051490	-0.166576	-0.279589	-0.864745	-0.879557		92.0933	90.9633	84.0767	56.3033	48.93		0.033993	0.000911074	1.85362e-23	1.13724e-23		0.111307	0.00577082	1.99345e-21	1.30707e-21		down	down	down	down		no	no	no	no
	G	long-chain acyl-CoA synthetase	ACSL	CRYCO00051491	-0.0601118	-0.480185	-0.310004	-0.243046		60.7567	65.09	47.8333	56.1233	55.4967		0.558846	0.00012277	0.00816995	0.0665497		0.703774	0.00119204	0.0474832	0.241955		down	down	down	down		no	no	no	no
	M	long-chain acyl-CoA synthetase	ACSL	CRYCO00051491	-0.113209	-0.293991	-0.930639	-1.06299		60.7567	62.4067	56.37	34.98	30.0367		0.291734	0.00700975	5.09541e-17	9.08651e-20		0.472477	0.0257797	2.84609e-15	8.9126e-18		down	down	down	down		no	no	no	yes
	S	long-chain acyl-CoA synthetase	ACSL	CRYCO00051491	-0.168612	-0.322313	-0.973779	-1.24258		60.7567	59.0467	52.4967	34.5433	25.5767		0.100544	0.00260823	5.1148e-17	3.84131e-23		0.244714	0.0137023	3.30771e-15	4.27418e-21		down	down	down	down		no	no	no	yes
	G	acyl-CoA oxidase	ACOX	CRYCO0009139	-0.0404762	-0.367122	-0.475806	-0.410345		74.3367	77.4733	58.3	59.65	62.4967		0.577747	0.000107786	9.76099e-08	1.74824e-06		0.718984	0.00106734	2.53839e-06	4.21335e-05		down	down	down	down		no	no	no	no
	M	acyl-CoA oxidase	ACOX	CRYCO0009139	-0.0546227	-0.290801	-0.442717	-0.344979		74.3367	75.7333	68.69	59.2067	64.34		0.474046	0.000154083	1.06708e-09	3.10806e-05		0.648243	0.000986062	2.52433e-08	0.000425302		down	down	down	down		no	no	no	no
	S	acyl-CoA oxidase	ACOX	CRYCO0009139	-0.0614773	-0.234171	-0.409199	-0.312283		74.3367	76.0633	66.7233	62.1133	65.3067		0.375233	0.00227333	5.59176e-08	4.95455e-05		0.583025	0.0122247	1.05856e-06	0.000567977		down	down	down	down		no	no	no	no
	G	butyryl-CoA dehydrogenase	ACDH	CRYCO00024169	-0.563607	-1.51187	-1.78502	-1.63992		68.88	45.5967	24.7367	20.73	22.5533		2.72464e-12	0.000928356	1.89316e-46	2.25165e-60		9.55615e-11	0.00635836	1.77816e-43	2.10589e-57		down	down	down	down		no	yes	yes	yes
	M	butyryl-CoA dehydrogenase	ACDH	CRYCO00024169	-0.658798	-0.489872	-0.216203	-0.299901		68.88	45.2467	54.8033	61.8833	56.9667		2.19821e-14	1.11091e-08	0.00431719	0.000453721		1.51525e-12	1.86058e-07	0.0216987	0.00431166		down	down	down	down		no	no	no	no
	S	butyryl-CoA dehydrogenase	ACDH	CRYCO00024169	-0.560081	-0.331913	-0.246839	-0.12801		68.88	48.2967	57.3233	62.6233	63.1567		1.67564e-13	2.99241e-05	0.00202229	0.104234		1.12363e-11	0.000307161	0.0115092	0.255536		down	down	down	down		no	no	no	no
	G	short-chain 2-methylacyl-CoA dehydrogenase	ACDH	CRYCO00024170	-1.13196	-1.75403	-2.11739	-2.3724		65.16	33.4033	21.0667	17.15	13.65		1.26478e-15	0.00379505	1.69039e-45	2.07909e-57		7.51063e-14	0.019976	1.4995e-42	1.70144e-54		down	down	down	down		yes	yes	yes	yes
	M	short-chain 2-methylacyl-CoA dehydrogenase	ACDH	CRYCO00024170	-0.939493	-0.587699	-0.516745	-0.646123		65.16	38.1567	49.85	50.3433	42.7433		2.65316e-14	4.94555e-07	4.17236e-06	9.58257e-07		1.80844e-12	5.89098e-06	5.1095e-05	1.90244e-05		down	down	down	down		no	no	no	no
	S	short-chain 2-methylacyl-CoA dehydrogenase	ACDH	CRYCO00024170	-0.98578	-0.581317	-0.587952	-0.517904		65.16	36.45	47.8667	48.8167	45.1267		2.23077e-17	1.30947e-06	1.57307e-06	5.25392e-05		2.67097e-15	1.9564e-05	2.20963e-05	0.000597111		down	down	down	down		no	no	no	no
	G	acyl-CoA dehydrogenase	ACDH	CRYCO00016438	-0.394806	-0.470701	-0.517905	-0.454691		115.123	98.3167	91.6367	93.39	92.5633		8.60423e-09	2.9065e-07	1.02157e-10	6.8182e-09		1.55086e-07	6.55029e-06	4.48534e-09	2.6798e-07		down	down	down	down		no	no	no	no
	M	acyl-CoA dehydrogenase	ACDH	CRYCO00016438	-0.367359	-0.504446	-0.381667	-0.237476		115.123	98.9333	93.47	97.5533	103.75		7.53782e-07	1.81592e-11	2.57412e-08	0.00134938		1.15482e-05	4.96072e-10	4.89143e-07	0.0106425		down	down	down	down		no	no	no	no
	S	acyl-CoA dehydrogenase	ACDH	CRYCO00016438	-0.279218	-0.298894	-0.302071	-0.164504		115.123	104.247	101.38	105.03	103.98		1.34683e-05	3.24284e-05	1.40361e-05	0.0235708		0.000171607	0.000329475	0.000157867	0.0880315		down	down	down	down		no	no	no	no
	G	acyl-CoA dehydrogenase	ACDH	CRYCO00032414	-0.547347	-1.05883	-1.26507	-1.12399		84.9367	65.1367	45.45	40.91	43.6467		1.61445e-15	1.07606e-16	3.2304e-49	3.92612e-46		9.3259e-14	1.78231e-14	3.51688e-46	2.11678e-43		down	down	down	down		no	yes	yes	yes
	M	acyl-CoA dehydrogenase	ACDH	CRYCO00032414	-0.501346	-0.673112	-0.613152	-0.386907		84.9367	66.13	61.2767	61.4533	69.6167		1.48642e-10	8.98494e-18	1.18912e-18	2.33845e-07		5.13386e-09	6.05998e-16	7.54765e-17	5.24273e-06		down	down	down	down		no	no	no	no
	S	acyl-CoA dehydrogenase	ACDH	CRYCO00032414	-0.385461	-0.44711	-0.472618	-0.262301		84.9367	72.26	68.1167	69.5	72.5567		4.29598e-09	4.11387e-10	4.63283e-10	0.000304915		1.31329e-07	1.31244e-08	1.28604e-08	0.00270557		down	down	down	down		no	no	no	no
	G	acyl-CoA dehydrogenase	ACDH	CRYCO00053911	-0.20404	-0.176157	-0.182096	-0.0403381		135.107	128.183	129.097	137.427	142.637		0.0020773	0.0880094	0.0234935	0.599923		0.00890162	0.218146	0.106259	0.821001		down	down	down	down		no	no	no	no
	M	acyl-CoA dehydrogenase	ACDH	CRYCO00053911	-0.15781	-0.21694	-0.0184125	0.230454		135.107	132.283	132.383	145.177	170.15		0.0378009	0.00232278	0.783098	0.0016259		0.106552	0.0102684	0.888461	0.0123532		down	down	down	up		no	no	no	no
	S	acyl-CoA dehydrogenase	ACDH	CRYCO00053911	-0.116529	-0.0717402	0.052678	0.352652		135.107	135.703	135.877	155.823	178.2		0.0697477	0.302262	0.434365	7.77959e-07		0.188757	0.501698	0.63941	1.45153e-05		down	down	up	up		no	no	no	no
	G	long-chain-acyl-CoA dehydrogenase	ACDH	CRYCO00036080	-0.344468	-0.489546	-0.76186	-0.694083		82.1767	72.5533	64.3867	56.0167	55.65		6.06498e-06	7.46536e-07	8.41747e-17	1.79417e-14		5.70522e-05	1.48402e-05	8.31369e-15	1.50869e-12		down	down	down	down		no	no	no	no
	M	long-chain-acyl-CoA dehydrogenase	ACDH	CRYCO00036080	-0.24955	-0.343646	-0.266177	-0.0525683		82.1767	76.7633	74.43	75.2967	83.4433		0.0024281	7.75478e-05	0.000651996	0.547015		0.0119671	0.00053943	0.00446173	0.754979		down	down	down	down		no	no	no	no
	S	long-chain-acyl-CoA dehydrogenase	ACDH	CRYCO00036080	-0.207509	-0.195748	-0.122356	0.0487763		82.1767	78.2533	77.86	84.7267	85.5367		0.00598991	0.016887	0.127639	0.546458		0.0287195	0.0615984	0.288869	0.728078		down	down	down	up		no	no	no	no
	G	enoyl-CoA hydratase	ECH	CRYCO00046821	-0.328887	-0.253887	-0.91115	-1.92959		30.8933	27.6533	28.5033	18.8667	8.55		2.74254e-05	0.00912474	8.35546e-24	9.05231e-102		0.000214988	0.0398998	1.74779e-21	4.14849e-98		down	down	down	down		no	no	no	yes
	M	enoyl-CoA hydratase	ECH	CRYCO00046821	-0.41535	-0.467421	-0.553173	-0.535697		30.8933	25.7567	25.6967	23.0667	22.2233		2.30275e-07	7.77068e-09	4.19719e-14	3.66525e-11		3.98653e-06	1.34106e-07	1.73255e-12	1.5471e-09		down	down	down	down		no	no	no	no
	S	enoyl-CoA hydratase	ECH	CRYCO00046821	-0.387723	-0.372636	-0.531814	-0.410094		30.8933	25.9133	25.7967	23.8733	23.0833		2.00342e-07	1.03867e-06	3.60321e-11	6.50357e-08		4.17709e-06	1.59003e-05	1.17067e-09	1.52535e-06		down	down	down	down		no	no	no	no
	G	enoyl-CoA hydratase	ECH	CRYCO00021192	-0.837715	-0.92205	-1.50766	-2.20033		107.22	68.3967	62.7133	42.4	24.65		3.18839e-13	3.95907e-10	1.09427e-23	8.59114e-53		1.31812e-11	1.83815e-08	2.24969e-21	5.96538e-50		down	down	down	down		no	no	yes	yes
	M	enoyl-CoA hydratase	ECH	CRYCO00021192	-0.719285	-0.810684	-0.570592	-0.486621		107.22	76.28	70.98	80.91	73.8767		5.15982e-08	1.48485e-10	1.56659e-07	3.56838e-05		1.05027e-06	3.44854e-09	2.58755e-06	0.000479787		down	down	down	down		no	no	no	no
	S	enoyl-CoA hydratase	ECH	CRYCO00021192	-0.663637	-0.568032	-0.659138	-0.50157		107.22	77.6533	83.79	77.0533	72.3633		3.71522e-09	6.04614e-07	1.16948e-08	9.01868e-06		1.14723e-07	9.79459e-06	2.52107e-07	0.00012872		down	down	down	down		no	no	no	no
	G	enoyl-CoA hydratase	ECH	CRYCO00083563	-0.652547	-0.331076	-0.587952	-0.467586		88.6733	63.1233	75.5033	66	72.3033		9.3652e-10	0.0102826	1.59405e-06	0.000322922		2.05788e-08	0.0437166	3.13843e-05	0.0040645		down	down	down	down		no	no	no	no
	M	enoyl-CoA hydratase	ECH	CRYCO00083563	-0.618685	-0.760443	-0.599815	-0.719961		88.6733	60.48	56.4667	61.1567	54.1733		2.83805e-08	7.74128e-12	7.41201e-09	6.89578e-09		6.08872e-07	2.23463e-10	1.53954e-07	2.10104e-07		down	down	down	down		no	no	no	no
	S	enoyl-CoA hydratase	ECH	CRYCO00083563	-0.606247	-0.482459	-0.710715	-0.525208		88.6733	58.64	65.4933	55.8467	63.94		3.48682e-09	9.09402e-06	1.0607e-10	4.55566e-06		1.08355e-07	0.000108498	3.22503e-09	7.0488e-05		down	down	down	down		no	no	no	no
	G	enoyl-CoA hydratase	ECH	CRYCO00032538	-0.552924	-0.89139	-1.54	-2.09464		11.9433	9.13	7.07	4.73333	3.05667		5.76e-05	0.000204039	3.60349e-22	6.31589e-34		0.000413291	0.0018179	6.41688e-20	1.99617e-31		down	down	down	down		no	no	yes	yes
	M	enoyl-CoA hydratase	ECH	CRYCO00032538	-0.359517	-0.508825	-0.471275	-0.515822		11.9433	10.3567	9.66333	9.51333	8.77333		0.00721468	0.000122703	0.000991906	0.00014721		0.0288942	0.000807955	0.00636116	0.00165018		down	down	down	down		no	no	no	no
	S	enoyl-CoA hydratase	ECH	CRYCO00032538	-0.43334	-0.453057	-0.564094	-0.498642		11.9433	9.73333	9.48	9.07	8.5		0.000812431	0.00079724	1.94497e-05	0.000318668		0.00561121	0.00515208	0.000211066	0.00280805		down	down	down	down		no	no	no	no
	G	enoyl-CoA hydratase	ECH	CRYCO00069166	0.101524	0.0547106	-0.206534	0.469734		19.4733	23.8567	22.5133	18.78	27.3733		0.709391	0.851061	0.474236	0.0660443		0.818799	0.923207	0.72303	0.240767		up	up	down	up		no	no	no	no
	M	enoyl-CoA hydratase	ECH	CRYCO00069166	0.071237	0.182013	0.250569	0.668919		19.4733	24.6267	25.6467	26.08	28.19		0.803672	0.494958	0.329564	0.006598		0.88961	0.658335	0.547392	0.0378999		up	up	up	up		no	no	no	no
	S	enoyl-CoA hydratase	ECH	CRYCO00069166	0.31113	-0.283325	-0.292843	0.22264		19.4733	28.4567	42.1567	43.2833	54.75		0.226358	0.00424666	0.0019311	0.0310075		0.424159	0.0205045	0.0110758	0.107672		up	down	down	up		no	no	no	no
	G	enoyl-CoA hydratase	ECH	CRYCO00033782	-0.371663	-0.220175	-0.333296	-0.227019		47.0633	40.78	44.53	43.08	43.7067		5.3e-05	0.0965039	0.0036677	0.0265572		0.000385034	0.232565	0.0253193	0.12964		down	down	down	down		no	no	no	no
	M	enoyl-CoA hydratase	ECH	CRYCO00033782	-0.45855	-0.415025	-0.328331	-0.0308011		47.0633	37.85	40.7033	41.8067	47.7367		2.32046e-06	2.65212e-05	0.00027162	0.746326		3.07415e-05	0.000209907	0.00209486	0.877313		down	down	down	down		no	no	no	no
	S	enoyl-CoA hydratase	ECH	CRYCO00033782	-0.357715	0.0995882	0.261586	0.709079		47.0633	40.2333	25.4167	26.37	29.27		0.000118008	0.726219	0.325652	0.00795294		0.0011084	0.845477	0.537423	0.0383719		down	up	up	up		no	no	no	no
	G	enoyl-CoA hydratase	ECH	CRYCO00011063	0.356132	0.128004	-0.151663	-0.301582		17.84	23.3867	19.3333	17.9867	12.8733		0.0347247	0.500839	0.409467	0.111929		0.0907593	0.690005	0.670666	0.337399		up	up	down	down		no	no	no	no
	M	enoyl-CoA hydratase	ECH	CRYCO00011063	0.17857	0.256644	0.0492329	0.0310861		17.84	19.6533	20.99	16.0133	14.4767		0.325701	0.130304	0.771824	0.862205		0.508812	0.25988	0.882513	0.938132		up	up	up	up		no	no	no	no
	S	enoyl-CoA hydratase	ECH	CRYCO00011063	0.246597	0.308593	0.185092	0.145468		17.84	19.2267	22.3633	19.7	18.6		0.139396	0.0702276	0.274626	0.410137		0.307197	0.18217	0.482161	0.616296		up	up	up	up		no	no	no	no
	G	3-hydroxyacyl-CoA dehydrogenase	HADH	CRYCO00036834	-0.143495	-0.736241	-1.13113	-1.53262		33.7467	33.8767	22.0567	17.7	12.6867		0.107442	3.30176e-09	3.10096e-26	1.51606e-46		0.217763	1.25835e-07	7.85938e-24	8.2712e-44		down	down	down	down		no	no	yes	yes
	M	3-hydroxyacyl-CoA dehydrogenase	HADH	CRYCO00036834	-0.217236	-0.178354	-0.361942	-0.280149		33.7467	32.0933	33.9833	28.6067	29.2133		0.0191653	0.0565314	4.51603e-05	0.0046691		0.0628073	0.13914	0.000428575	0.0288078		down	down	down	down		no	no	no	no
	S	3-hydroxyacyl-CoA dehydrogenase	HADH	CRYCO00036834	-0.211747	-0.102873	-0.30113	-0.290886		33.7467	32.1233	33.59	30.4333	27.65		0.0135209	0.258981	0.00112549	0.00188148		0.055148	0.455233	0.00705562	0.0122051		down	down	down	down		no	no	no	no
	G	3-hydroxyacyl-CoA dehydrogenase	HADH	CRYCO00025871	0.98888	0.895312	0.727965	0.677274		51.65	118.387	106.47	100.96	93.4267		3.83453e-36	3.26913e-13	8.09809e-15	8.52371e-13		2.63707e-33	2.95258e-11	6.23657e-13	5.90067e-11		up	up	up	up		no	no	no	no
	M	3-hydroxyacyl-CoA dehydrogenase	HADH	CRYCO00025871	0.873291	1.10859	0.91794	1.13436		51.65	105.013	128.167	109.577	119.98		6.93486e-26	1.05136e-39	4.87255e-31	3.26073e-26		2.22974e-23	5.6423e-37	7.32742e-29	5.05107e-24		up	up	up	up		no	yes	no	yes
	S	3-hydroxyacyl-CoA dehydrogenase	HADH	CRYCO00025871	0.762084	1.04517	0.883626	0.969113		51.65	96.78	118.43	109.307	103.11		2.64515e-23	5.21265e-39	4.11242e-27	1.41233e-27		6.94723e-21	2.74117e-36	5.92796e-25	2.05322e-25		up	up	up	up		no	yes	no	no
	G	3-hydroxyacyl-CoA dehydrogenase	HADH	CRYCO00025872	1.19174	1.21071	0.946552	0.558596		35.1	89.8933	100.96	78.1933	56.69		4.24722e-43	6.54287e-28	1.52326e-21	1.88918e-05		5.02664e-40	4.53904e-25	2.51611e-19	0.000345343		up	up	up	up		yes	yes	no	no
	M	3-hydroxyacyl-CoA dehydrogenase	HADH	CRYCO00025872	1.07989	1.20527	0.925423	1.04636		35.1	82.5467	93.15	73.56	75.8967		6.75114e-32	1.31222e-40	9.86994e-26	3.75376e-22		4.17648e-29	7.35875e-38	1.05554e-23	4.39309e-20		up	up	up	up		yes	yes	no	yes
	S	3-hydroxyacyl-CoA dehydrogenase	HADH	CRYCO00025872	0.907447	1.19852	0.993511	0.635758		35.1	72.4567	87.5167	78.4533	55.05		2.67716e-26	3.85358e-42	5.11603e-24	1.1041e-05		9.27533e-24	2.30512e-39	5.74736e-22	0.000153259		up	up	up	up		no	yes	no	no
	G	3-hydroxyacyl-CoA dehydrogenase	HADH	CRYCO00075606	-0.26719	0.453136	0.148211	0.299736		62.1167	57.75	93.1633	78.9833	83.1767		0.0116936	0.00078035	0.232823	0.0102788		0.037624	0.00550779	0.490207	0.0653701		down	up	up	up		no	no	no	no
	M	3-hydroxyacyl-CoA dehydrogenase	HADH	CRYCO00075606	-0.38576	-0.156427	-0.182186	-0.0913552		62.1167	52.9467	63.9233	60.2933	60.6467		0.000382452	0.178322	0.0776059	0.41534		0.00255834	0.326932	0.206401	0.65227		down	down	down	down		no	no	no	no
	S	3-hydroxyacyl-CoA dehydrogenase	HADH	CRYCO00075606	-0.265259	-0.138103	-0.220093	-0.114867		62.1167	56.87	61.44	59.6733	57.2967		0.00967156	0.252564	0.0498497	0.32314		0.0421995	0.447877	0.147394	0.534196		down	down	down	down		no	no	no	no
	G	3-hydroxyacyl-CoA dehydrogenase	HADH	CRYCO00042730	0.0550912	-0.0468984	-0.0336619	0.294004		10.7933	12.77	11.8967	12.2433	14.1533		0.712965	0.776755	0.8293	0.0464766		0.821031	0.880605	0.93092	0.19053		up	down	down	up		no	no	no	no
	M	3-hydroxyacyl-CoA dehydrogenase	HADH	CRYCO00042730	0.292102	0.266633	0.57864	0.58052		10.7933	15.22	15.3	18.2533	17.0333		0.042686	0.0718927	3.67574e-05	5.11655e-05		0.11714	0.167039	0.000358723	0.000659953		up	up	up	up		no	no	no	no
	S	3-hydroxyacyl-CoA dehydrogenase	HADH	CRYCO00042730	0.368884	0.541193	0.651214	0.895193		10.7933	15.73	17.8967	19.4	20.1067		0.00729162	0.000169117	2.52307e-06	5.33143e-10		0.0336285	0.00136682	3.3832e-05	1.81102e-08		up	up	up	up		no	no	no	no
	G	3-hydroxyacyl-CoA dehydrogenase	HADH	CRYCO00075607	0.0109061	0.445226	-0.056453	0.203657		25.5333	32.0533	44.0633	33.7167	39.1067		0.897759	1.68139e-05	0.568128	0.0449285		0.941174	0.000220567	0.789993	0.185997		up	up	down	up		no	no	no	no
	M	3-hydroxyacyl-CoA dehydrogenase	HADH	CRYCO00075607	0.00462281	0.0357589	0.0724471	0.28134		25.5333	32.3867	33.3367	35.0233	38.4833		0.960275	0.731515	0.390459	0.00297061		0.978964	0.839342	0.605656	0.0200863		up	up	up	up		no	no	no	no
	S	3-hydroxyacyl-CoA dehydrogenase	HADH	CRYCO00075607	0.101393	0.187302	0.0987651	0.492977		25.5333	33.54	35.0733	35.7833	42.08		0.226763	0.0319329	0.256574	6.15131e-08		0.424722	0.101131	0.461768	1.45086e-06		up	up	up	up		no	no	no	no
	G	3-hydroxyacyl-CoA dehydrogenase	HADH	CRYCO00041826	0.167152	0.362143	-0.396391	-0.650089		10.6467	13.4133	15.1533	9.38667	7.49667		0.0916565	0.0070099	0.000210672	4.49014e-09		0.193203	0.0323984	0.00235785	1.81459e-07		up	up	down	down		no	no	no	no
	M	3-hydroxyacyl-CoA dehydrogenase	HADH	CRYCO00041826	0.173258	0.184819	-0.32571	-0.560914		10.6467	13.25	14.04	9.39	7.70667		0.106692	0.0570238	0.00144105	1.8246e-06		0.232592	0.140103	0.00871225	3.37598e-05		up	up	down	down		no	no	no	no
	S	3-hydroxyacyl-CoA dehydrogenase	HADH	CRYCO00041826	0.0324144	0.275201	-0.0110823	-0.275601		10.6467	11.9367	13.98	11.8733	8.94		0.721848	0.00682525	0.908491	0.0141924		0.846431	0.0301863	0.956036	0.0601108		up	up	down	down		no	no	no	no
	G	3-hydroxyacyl-CoA dehydrogenase	HADH	CRYCO00040615	0.679678	0.779594	0.176234	-0.0482545		12.0467	20.3367	21.5433	15.5167	13.19		1.43e-08	3.63361e-07	0.20445	0.730569		2.45e-07	7.97129e-06	0.453919	0.888583		up	up	up	down		no	no	no	no
	M	3-hydroxyacyl-CoA dehydrogenase	HADH	CRYCO00040615	0.474716	0.553094	0.229531	-0.0966971		12.0467	17.8033	19.51	15.2933	12.0033		0.000390968	8.2771e-06	0.0674655	0.486944		0.00260603	7.53438e-05	0.186838	0.71059		up	up	up	down		no	no	no	no
	S	3-hydroxyacyl-CoA dehydrogenase	HADH	CRYCO00040615	0.373722	0.444836	0.191534	0.0913726		12.0467	16.72	17.2	15.22	13.1533		0.00226376	0.000451561	0.130987	0.489277		0.0130993	0.00317826	0.294264	0.683611		up	up	up	up		no	no	no	no
	G	acetyl-CoA acyltransferase 1	ACAT	CRYCO00035657	0.488888	0.553225	0.307962	0.319635		61.4367	101.333	106.09	87.38	75.77		8.69916e-07	9.70057e-06	0.0151443	0.0552514		1.00914e-05	0.000136532	0.0767421	0.214019		up	up	up	up		no	no	no	no
	M	acetyl-CoA acyltransferase 1	ACAT	CRYCO00035657	0.408043	0.532494	0.519236	1.19162		61.4367	95.18	106.453	100.113	134.923		0.000135005	1.5197e-07	8.41605e-08	5.38884e-16		0.00104763	2.02155e-06	1.46902e-06	3.87301e-14		up	up	up	up		no	no	no	yes
	S	acetyl-CoA acyltransferase 1	ACAT	CRYCO00035657	0.440293	0.586625	0.576093	1.05244		61.4367	96.3067	112.133	108.233	124.303		8.66347e-06	1.06168e-08	4.89528e-09	4.21341e-23		0.000117365	2.58553e-07	1.14336e-07	4.66695e-21		up	up	up	up		no	no	no	yes
	G	acetyl-CoA acyltransferase 1	ACAT	CRYCO00035658	0.933858	0.952404	0.509345	0.00194362		104.83	227.617	225.68	167.637	104.3		3.33033e-24	1.91254e-17	2.04633e-05	0.985804		6.01006e-22	3.49426e-15	0.000309613	0.995186		up	up	up	up		no	no	no	no
	M	acetyl-CoA acyltransferase 1	ACAT	CRYCO00035658	0.974473	0.824439	0.693784	0.93252		104.83	246.923	211.8	183.3	183.513		1.80363e-17	3.99437e-16	3.86037e-14	4.55891e-16		1.94585e-15	2.1693e-14	1.60163e-12	3.31133e-14		up	up	up	up		no	no	no	no
	S	acetyl-CoA acyltransferase 1	ACAT	CRYCO00035658	0.776465	0.973344	0.689224	0.713607		104.83	207.117	234.203	188.363	158.687		5.24372e-18	1.51327e-24	1.03466e-11	2.19132e-09		6.86759e-16	2.87364e-22	3.5933e-10	6.70672e-08		up	up	up	up		no	no	no	no
	G	acetyl-CoA acyltransferase 1	ACAT	CRYCO00079007	0.00616595	-0.143837	0.000571978	0.0508941		650.84	771.897	677.927	772.753	745.237		0.928165	0.159049	0.994845	0.521731		0.959442	0.329654	0.9982	0.771942		up	down	up	up		no	no	no	no
	M	acetyl-CoA acyltransferase 1	ACAT	CRYCO00079007	0.0905538	0.1522	0.2774	0.36366		650.84	806.477	859.81	890.277	869.543		0.220142	0.04836	9.94644e-05	1.24179e-06		0.390348	0.123105	0.000861919	2.39726e-05		up	up	up	up		no	no	no	no
	S	acetyl-CoA acyltransferase 1	ACAT	CRYCO00079007	0.0686555	0.294348	0.322783	0.550247		650.84	777.493	892.377	933.17	964.05		0.305096	8.81671e-05	7.2332e-06	7.59288e-13		0.513038	0.000782628	8.70622e-05	3.69412e-11		up	up	up	up		no	no	no	no
					Log2fc					TPM						pvalue					padjust					regulate					significant
Pathway	Group	Gene name	Abbreviation	gene_id	6h	12h	24h	48h		0h	6h	12h	24h	48h		6h	12h	24h	48h		6h	12h	24h	48h		6h	12h	24h	48h		6h	12h	24h	48h
Biosynthesis of unsaturated fatty acids
	G	stearoyl-CoA desaturase (Delta-9 desaturase)	FAD	CRYCO000392	1.02535	1.31762	1.2265	0.628184		14.0633	32.58	36.83	36.95	23.7033		8.15213e-15	1.27809e-16	5.80398e-16	0.000134157		4.29028e-13	2.08804e-14	5.13905e-14	0.00191472		up	up	up	up		yes	yes	yes	no
	M	stearoyl-CoA desaturase (Delta-9 desaturase)	FAD	CRYCO000392	0.456737	-0.0573041	-0.471485	-1.13264		14.0633	21.2633	14.61	11.3467	6.32		0.00113658	0.707019	0.00210882	3.60601e-10		0.00741888	0.83328	0.0119349	1.25458e-08		up	down	down	down		no	no	no	yes
	S	stearoyl-CoA desaturase (Delta-9 desaturase)	FAD	CRYCO000392	0.619271	0.0892869	-0.586345	-0.829837		14.0633	24.14	16.97	10.1133	8.14333		1.48296e-05	0.532527	8.03854e-05	3.37268e-07		0.00015531	0.689704	0.000714319	7.34471e-06		up	up	down	down		no	no	no	no
	G	fatty acid desaturase FAD	FAD	CRYCO000392	1.31762	1.31762	1.2265	0.628184		14.0633	36.83	36.83	36.95	23.7033		1.27809e-16	1.27809e-16	5.80398e-16	0.000134157		2.08804e-14	2.08804e-14	5.13905e-14	0.00191472		up	up	up	up		yes	yes	yes	no
	M	fatty acid desaturase FAD	FAD	CRYCO000392	0.619271	0.0892869	-0.586345	-0.829837		14.0633	24.14	16.97	10.1133	8.14333		1.48296e-05	0.532527	8.03854e-05	3.37268e-07		0.00015531	0.689704	0.000714319	7.34471e-06		up	up	down	down		no	no	no	no
	S	fatty acid desaturase FAD	FAD	CRYCO000392	0.456737	-0.0573041	-0.471485	-1.13264		14.0633	21.2633	14.61	11.3467	6.32		0.00113658	0.707019	0.00210882	3.60601e-10		0.00741888	0.83328	0.0119349	1.25458e-08		up	down	down	down		no	no	no	yes
	G	fatty acid desaturase FAD	FAD	CRYCO00021012	-0.670725	-0.670725	-0.509708	-0.356338		36.6333	25.4667	25.4667	29.4833	30.4567		0.000104542	0.000104542	0.00140128	0.0220574		0.00104167	0.00104167	0.0116333	0.113821		down	down	down	down		no	no	no	no
	M	fatty acid desaturase FAD	FAD	CRYCO00021012	-0.548759	-0.522664	-0.287083	0.0683391		36.6333	29.1667	29.5967	33.5633	37.8567		0.000679009	0.000878236	0.0685524	0.648768		0.00416619	0.00447684	0.189006	0.820178		down	down	down	up		no	no	no	no
	S	fatty acid desaturase FAD	FAD	CRYCO00021012	-0.404152	-0.525098	-0.4656	0.107648		36.6333	31.4467	28.9233	29.98	38.0967		0.00659101	0.00075741	0.00294771	0.501575		0.0310131	0.0049246	0.0157109	0.693572		down	down	down	up		no	no	no	no
	G	fatty acid desaturase FAD	FAD	CRYCO00021013	-0.553032	-0.553032	-0.680662	-0.660324		32.2233	24.2367	24.2367	23.2933	22.3167		8.6593e-06	8.6593e-06	6.48149e-09	5.28603e-09		0.000123511	0.000123511	2.11777e-07	2.11941e-07		down	down	down	down		no	no	no	no
	M	fatty acid desaturase FAD	FAD	CRYCO00021013	-0.563613	-0.662413	-0.607351	-0.414046		32.2233	24.45	23.4967	23.3867	25.28		2.04841e-07	2.81812e-10	1.47425e-08	0.000230676		3.58005e-06	6.26514e-09	2.91592e-07	0.00242885		down	down	down	down		no	no	no	no
	S	fatty acid desaturase FAD	FAD	CRYCO00021013	-0.414901	-0.576734	-0.483791	-0.385773		32.2233	26.73	23.64	26.0067	24.7267		3.12951e-05	2.24668e-08	4.0299e-06	0.00015001		0.000356197	5.09204e-07	5.18159e-05	0.00147703		down	down	down	down		no	no	no	no
	G	fatty acid desaturase FAD	FAD	CRYCO00021014	-0.309558	-0.309558	-0.459952	-0.252425		35.5967	31.5267	31.5267	29.5967	31.8933		0.0645058	0.0645058	0.00410263	0.120697		0.174342	0.174342	0.0277597	0.353233		down	down	down	down		no	no	no	no
	M	fatty acid desaturase FAD	FAD	CRYCO00021014	-0.347803	-0.595036	-0.253608	0.0500733		35.5967	32.2367	27.1767	33.1833	36.5767		0.0265743	0.000162337	0.0867586	0.74281		0.0811763	0.0010306	0.22353	0.875358		down	down	down	up		no	no	no	no
	S	fatty acid desaturase FAD	FAD	CRYCO00021014	-0.278632	-0.27852	-0.218974	-0.110942		35.5967	32.99	33.0067	34.5467	32.0033		0.0637041	0.0695778	0.146459	0.472884		0.176838	0.181063	0.317843	0.670274		down	down	down	down		no	no	no	no
	G	fatty acid desaturase FAD	FAD	CRYCO00024995	-0.245037	-0.245037	-0.327458	-0.263939		17.6167	16.1	16.1	16.4033	15.85		0.0443949	0.0443949	0.00760483	0.0180268		0.132843	0.132843	0.0448077	0.0986898		down	down	down	down		no	no	no	no
	M	fatty acid desaturase FAD	FAD	CRYCO00024995	-0.104785	-0.441669	-0.285985	-0.186871		17.6167	17.9667	14.63	15.4967	16.8033		0.321282	3.13718e-05	0.00483763	0.0883927		0.504261	0.000243207	0.0237886	0.252222		down	down	down	down		no	no	no	no
	S	fatty acid desaturase FAD	FAD	CRYCO00024995	-0.0139365	-0.325255	-0.319143	-0.148371		17.6167	18.7733	15.01	15.4867	15.51		0.885856	0.00187473	0.00220144	0.155328		0.94322	0.010444	0.0123482	0.334062		down	down	down	down		no	no	no	no
	G	fatty acid desaturase FAD	FAD	CRYCO0004441	-0.177746	-0.177746	0.0293855	0.0379075		51.1167	44.9633	44.9633	63.78	60.4367		0.349042	0.349042	0.869014	0.839068		0.555517	0.555517	0.948559	0.936959		down	down	up	up		no	no	no	no
	M	fatty acid desaturase FAD	FAD	CRYCO0004441	-0.262448	0.0241243	0.29593	0.666668		51.1167	51.5933	57.47	74.6567	87.34		0.16622	0.886347	0.0625909	3.28921e-05		0.320606	0.936522	0.176816	0.000446263		down	up	up	up		no	no	no	no
	S	fatty acid desaturase FAD	FAD	CRYCO0004441	0.0223079	0.0324981	0.287243	0.553213		51.1167	61.9333	52.8667	75.3067	79.4033		0.89325	0.847606	0.0792862	0.000765784		0.947016	0.9193	0.20603	0.00585663		up	up	up	up		no	no	no	no
	G	fatty acid desaturase FAD	FAD	CRYCO00061726	-0.0745223	-0.0745223	0.0342098	0.28167		23.5933	27.1367	27.1367	30.3567	32.3967		0.516807	0.516807	0.745728	0.00504694		0.70218	0.70218	0.889894	0.0380038		down	down	up	up		no	no	no	no
	M	fatty acid desaturase FAD	FAD	CRYCO00061726	-0.0175638	-0.0606028	-0.0285198	-0.0723011		23.5933	28.0467	28.9	28.78	25.36		0.862107	0.556591	0.75837	0.459218		0.926353	0.70898	0.874246	0.688453		down	down	down	down		no	no	no	no
	S	fatty acid desaturase FAD	FAD	CRYCO00061726	-0.0706719	0.0123879	-0.0481058	-0.0723046		23.5933	26.02	28.5267	28.49	25.1167		0.439584	0.896829	0.618013	0.455941		0.640388	0.947185	0.782524	0.656216		down	up	down	down		no	no	no	no
	G	fatty acid desaturase FAD	FAD	CRYCO00067261	0.640017	0.640017	0.683639	0.982797		14.8367	25.7533	25.7533	28.1633	32.86		1.4075e-08	1.4075e-08	2.73013e-11	2.21611e-25		4.56466e-07	4.56466e-07	1.30128e-09	4.30339e-23		up	up	up	up		no	no	no	no
	M	fatty acid desaturase FAD	FAD	CRYCO00067261	0.184581	0.00485026	0.296866	0.555801		14.8367	18.6233	16.8933	20.2533	23.4367		0.0742967	0.96355	0.00173975	1.91459e-08		0.178053	0.980524	0.0102136	5.30653e-07		up	up	up	up		no	no	no	no
	S	fatty acid desaturase FAD	FAD	CRYCO00067261	0.150544	0.218576	0.455689	0.740652		14.8367	18.05	18.9633	22.9933	25.41		0.111808	0.0718275	2.04745e-06	5.97201e-14		0.263772	0.185276	2.80357e-05	3.23409e-12		up	up	up	up		no	no	no	no
	G	fatty acid desaturase FAD	FAD	CRYCO00072722	0.285761	0.285761	0.244476	0.194534		21.31	28.6767	28.6767	29.6767	26.43		0.0260416	0.0260416	0.0192245	0.0512832		0.0893333	0.0893333	0.0918838	0.203322		up	up	up	up		no	no	no	no
	M	fatty acid desaturase FAD	FAD	CRYCO00072722	0.104075	0.0873689	0.267158	0.405257		21.31	25.93	27.17	28.4667	29.94		0.340893	0.397656	0.00397551	0.000234124		0.524382	0.570667	0.0203186	0.00245918		up	up	up	up		no	no	no	no
	S	fatty acid desaturase FAD	FAD	CRYCO00072722	0.137498	0.201082	0.247485	0.271539		21.31	26.09	27.2867	28.58	25.7767		0.136434	0.0371273	0.0155058	0.00444898		0.302609	0.113541	0.0605468	0.0243604		up	up	up	up		no	no	no	no
	G	fatty acid desaturase FAD	FAD	CRYCO00072725	0.272913	0.272913	-0.126295	-0.296872		32.7	49.14	49.14	39.0767	30.5233		0.045971	0.045971	0.209101	0.00558376		0.136349	0.136349	0.459613	0.0409633		up	up	down	down		no	no	no	no
	M	fatty acid desaturase FAD	FAD	CRYCO00072725	0.261632	0.334668	0.261782	0.143219		32.7	47.2333	50.7	43.49	37.4667		0.0043395	0.000177776	0.00193528	0.122001		0.0192223	0.00111678	0.0111789	0.311883		up	up	up	up		no	no	no	no
	S	fatty acid desaturase FAD	FAD	CRYCO00072725	0.166979	0.366342	0.314708	0.0860077		32.7	42.7733	47.7233	45.5667	34.3867		0.0476292	0.000118711	0.00100877	0.381845		0.142902	0.00101136	0.00643604	0.590682		up	up	up	up		no	no	no	no
	G	elongation of very long chain fatty acids protein 7	ELOVL6	CRYCO00053264	-0.969484	-0.688823	-0.681738	-0.425079		48.7567	27.9333	33.3433	35.2267	39.95		9.09135e-32	9.16884e-11	1.62994e-12	8.25631e-07		4.05849e-29	4.91482e-09	9.306e-11	2.13286e-05		down	down	down	down		no	no	no	no
	M	elongation of very long chain fatty acids protein 7	ELOVL6	CRYCO00053264	-0.779175	-0.90891	-1.03351	-0.685063		48.7567	31.2167	28.12	26.7867	30.66		2.80164e-24	2.39503e-28	6.40358e-37	1.60625e-16		8.00369e-22	6.16191e-26	1.53998e-34	1.11449e-14		down	down	down	down		no	no	yes	no
	S	elongation of very long chain fatty acids protein 7	ELOVL6	CRYCO00053264	-0.894833	-1.16801	-1.1367	-0.905264		48.7567	29.07	24.9733	24.49	27.5933		2.52765e-26	8.93357e-30	9.27112e-47	5.15398e-25		8.82366e-24	2.25189e-27	3.10354e-44	7.45319e-23		down	down	down	down		no	yes	yes	no
	G	elongation of very long chain fatty acids protein 9	ELOVL6	CRYCO00053527	-0.760382	-0.558123	-0.758186	-0.589633		104.207	69.08	77.86	71.1	75.4467		2.8796e-21	2.24579e-07	4.02555e-17	1.87951e-11		3.74342e-19	5.21093e-06	4.08826e-15	1.09865e-09		down	down	down	down		no	no	no	no
	M	elongation of very long chain fatty acids protein 9	ELOVL6	CRYCO00053527	-0.731096	-0.768445	-0.90757	-0.777771		104.207	69.3233	66.8533	62.43	60.7		4.0271e-20	2.87174e-18	3.59834e-27	1.52108e-18		7.31331e-18	2.83934e-16	5.23422e-25	1.25932e-16		down	down	down	down		no	no	no	no
	S	elongation of very long chain fatty acids protein 9	ELOVL6	CRYCO00053527	-0.835096	-0.955606	-0.98343	-0.683482		104.207	65.3033	61.83	58.2567	67.5067		1.36979e-22	1.31476e-26	6.84102e-35	1.17019e-14		2.93616e-20	2.46691e-24	1.24757e-32	7.27432e-13		down	down	down	down		no	no	no	no
	G	17beta-estradiol 17-dehydrogenase	HCDH	CRYCO00060583	-0.356776	-0.233376	-0.472165	-0.141713		55.37	48.8	52.17	46.3933	55.0867		0.000482402	0.0679653	2.93882e-05	0.21141		0.00257823	0.181175	0.000426721	0.488257		down	down	down	down		no	no	no	no
	M	17beta-estradiol 17-dehydrogenase	HCDH	CRYCO00060583	-0.374474	-0.476521	-0.573145	-0.525374		55.37	47.33	43.5633	42.0133	38.7733		0.000168706	5.00085e-06	1.09978e-07	7.298e-07		0.00150227	6.43655e-05	1.96243e-06	1.37321e-05		down	down	down	down		no	no	no	no
	S	17beta-estradiol 17-dehydrogenase	HCDH	CRYCO00060583	-0.444145	-0.65755	-0.626308	-0.639896		55.37	45.5833	40.5667	39.7567	37.3867		4.25796e-05	1.24291e-08	3.73055e-09	2.34619e-08		0.000390936	2.06174e-07	8.09982e-08	6.38809e-07		down	down	down	down		no	no	no	no
	G	very-long-chain 3-oxoacyl-CoA reductase HSD17B12	HCDH	CRYCO00064907	-0.184391	0.0327221	-0.116939	-0.0295693		19.4567	19.1167	21.67	20.6967	20.8		0.0859385	0.790422	0.294023	0.789044		0.184062	0.888397	0.560334	0.914532		down	up	down	down		no	no	no	no
	M	very-long-chain 3-oxoacyl-CoA reductase HSD17B12	HCDH	CRYCO00064907	-0.190922	-0.421876	-0.507804	-0.425161		19.4567	19.0033	16.5467	14.9233	15.27		0.100555	0.000193561	3.36288e-06	0.00012271		0.22272	0.00120157	4.22187e-05	0.00141024		down	down	down	down		no	no	no	no
	S	very-long-chain 3-oxoacyl-CoA reductase HSD17B12	HCDH	CRYCO00064907	0.0534399	-0.240289	-0.356316	-0.328075		19.4567	22.1267	17.6567	17.0167	15.5767		0.587949	0.0300939	0.00104614	0.00303748		0.756829	0.0966002	0.00663218	0.0178955		up	down	down	down		no	no	no	no
	G	enoyl-CoA hydratase 2	ECH	CRYCO00016843	-0.698181	-0.673163	-0.863018	-0.505914		209.487	155.687	149.193	136.73	170.337		7.12566e-12	4.30351e-07	1.74337e-11	0.000114879		2.31418e-10	9.23354e-06	8.51285e-10	0.00167241		down	down	down	down		no	no	no	no
	M	enoyl-CoA hydratase 2	ECH	CRYCO00016843	-0.741858	-0.764622	-1.06502	-0.750334		209.487	132.2	130.613	119.853	135.903		1.72844e-13	2.04996e-12	2.14159e-24	7.69198e-11		1.15508e-11	9.46898e-11	2.51818e-22	2.93769e-09		down	down	down	down		no	no	yes	no
	S	enoyl-CoA hydratase 2	ECH	CRYCO00016843	-0.778997	-0.857403	-0.935282	-0.726166		209.487	142.787	135.84	135.47	132.6		1.82388e-11	6.16674e-15	3.88995e-19	2.58905e-11		7.47164e-10	2.89269e-13	2.56223e-17	1.11046e-09		down	down	down	down		no	no	no	no
	G	enoyl-CoA hydratase 5	ECH	CRYCO00016844	-0.426475	-0.430889	-0.763112	-0.822792		129.07	108.85	105.807	86.66	78.3167		1.44818e-05	0.000676177	1.68666e-09	2.44083e-15		0.000122607	0.00490413	6.07935e-08	2.27818e-13		down	down	down	down		no	no	no	no
	M	enoyl-CoA hydratase 5	ECH	CRYCO00016844	-0.653758	-0.643112	-1.09509	-0.993086		129.07	92.5733	92.7767	68.51	63.44		7.79617e-12	4.94167e-09	1.4238e-25	1.23589e-21		3.92225e-10	1.30148e-07	1.86172e-23	1.25509e-19		down	down	down	down		no	no	yes	no
	S	enoyl-CoA hydratase 5	ECH	CRYCO00016844	-0.575587	-0.770112	-0.977092	-1.01645		129.07	99.2767	87.67	73.1333	63.8933		4.30522e-07	2.24742e-14	6.06107e-24	9.79184e-23		6.98555e-06	9.71156e-13	5.78572e-22	1.20179e-20		down	down	down	down		no	no	no	yes
	G	enoyl-CoA hydratase 8	ECH	CRYCO00041356	-1.00943	-0.836769	-0.871043	-0.27009		332.787	185.187	205.133	206.147	295.36		1.87168e-35	2.10533e-12	2.40892e-12	0.0343992		1.17595e-32	1.6267e-10	1.33166e-10	0.154888		down	down	down	down		yes	no	no	no
	M	enoyl-CoA hydratase 8	ECH	CRYCO00041356	-0.79819	-0.699856	-0.705386	0.165233		332.787	211.897	225.757	228.467	367.717		5.82051e-25	4.48772e-17	2.97699e-16	0.047998		1.75517e-22	3.87645e-15	1.77643e-14	0.147996		down	down	down	up		no	no	no	no
	S	enoyl-CoA hydratase 8	ECH	CRYCO00041356	-0.922354	-0.912779	-0.630402	0.149719		332.787	198.21	203.907	238.383	375.89		2.65019e-26	1.26048e-27	7.66692e-16	0.101093		9.18583e-24	2.61039e-25	3.75088e-14	0.275927		down	down	down	up		no	no	no	no
	G	very-long-chain (3R)-3-hydroxyacyl-CoA dehydratase	HACD	CRYCO00014192	-0.0556392	0.109061	0.383165	0.297578		23.2433	25.1667	27.7333	35.3033	31.53		0.527878	0.317616	7.68541e-05	0.00305366		0.677979	0.522983	0.000986195	0.0256306		down	up	up	up			no	no	no	no
	M	very-long-chain (3R)-3-hydroxyacyl-CoA dehydratase	HACD	CRYCO00014192	-0.226836	-0.314203	-0.443699	-0.63782		23.2433	22.0067	21.5667	18.8867	15.9567		0.0158015	0.00110269	8.39855e-07	1.44107e-11		0.0538798	0.0054302	1.19881e-05	6.38098e-10		down	down	down	down			no	no	no	no
	S	very-long-chain (3R)-3-hydroxyacyl-CoA dehydratase	HACD	CRYCO00014192	-0.261731	-0.404292	-0.42146	-0.600713		23.2433	21.3133	19.0233	19.5567	15.5667		0.00212557	7.73345e-06	3.12069e-06	3.40575e-09		0.0124266	9.43365e-05	4.11279e-05	1.00157e-07		down	down	down	down			no	no	no	no
	G	acetyl-CoA acyltransferase 1	ACAT	CRYCO00035657	0.488888	0.553225	0.307962	0.319635		61.4367	101.333	106.09	87.38	75.77		8.69916e-07	9.70057e-06	0.0151443	0.0552514		1.00914e-05	0.000136532	0.0767421	0.214019		up	up	up	up		no	no	no	no
	M	acetyl-CoA acyltransferase 1	ACAT	CRYCO00035657	0.440293	0.586625	0.576093	1.05244		61.4367	96.3067	112.133	108.233	124.303		8.66347e-06	1.06168e-08	4.89528e-09	4.21341e-23		0.000117365	2.58553e-07	1.14336e-07	4.66695e-21		up	up	up	up		no	no	no	yes
	S	acetyl-CoA acyltransferase 1	ACAT	CRYCO00035657	0.408043	0.532494	0.519236	1.19162		61.4367	95.18	106.453	100.113	134.923		0.000135005	1.5197e-07	8.41605e-08	5.38884e-16		0.00104763	2.02155e-06	1.46902e-06	3.87301e-14		up	up	up	up		no	no	no	yes
	G	acetyl-CoA acyltransferase 2	ACAT	CRYCO00035658	0.933858	0.952404	0.509345	0.00194362		104.83	227.617	225.68	167.637	104.3		3.33033e-24	1.91254e-17	2.04633e-05	0.985804		6.01006e-22	2.87364e-22	0.000309613	0.995186		up	up	up	up		no	no	no	no
	M	acetyl-CoA acyltransferase 2	ACAT	CRYCO00035658	0.776465	0.973344	0.689224	0.713607		104.83	207.117	234.203	188.363	158.687		5.24372e-18	1.51327e-24	1.03466e-11	2.19132e-09		6.86759e-16	2.1693e-14	3.5933e-10	6.70672e-08		up	up	up	up		no	no	no	no
	S	acetyl-CoA acyltransferase 2	ACAT	CRYCO00035658	0.974473	0.824439	0.693784	0.93252		104.83	246.923	211.8	183.3	183.513		1.80363e-17	3.99437e-16	3.86037e-14	4.55891e-16		1.94585e-15		1.60163e-12	3.31133e-14		up	up	up	up		no	no	no	no
	G	acetyl-CoA acyltransferase 12	ACAT	CRYCO00079007	0.00616595	-0.143837	0.000571978	0.0508941		650.84	771.897	677.927	772.753	745.237		0.928165	0.159049	0.994845	0.521731		0.959442	0.329654	0.9982	0.771942		up	down	up	up		no	no	no	no
	M	acetyl-CoA acyltransferase 12	ACAT	CRYCO00079007	0.0686555	0.294348	0.322783	0.550247		650.84	777.493	892.377	933.17	964.05		0.305096	8.81671e-05	7.2332e-06	7.59288e-13		0.513038	0.000782628	8.70622e-05	3.69412e-11		up	up	up	up		no	no	no	no
	S	acetyl-CoA acyltransferase 12	ACAT	CRYCO00079007	0.0905538	0.1522	0.2774	0.36366		650.84	806.477	859.81	890.277	869.543		0.220142	0.04836	9.94644e-05	1.24179e-06		0.390348	0.123105	0.000861919	2.39726e-05		up	up	up	up		no	no	no	no
	G	acyl-CoA oxidase	ACOX	CRYCO0009139	-0.0404762	-0.367122	-0.475806	-0.410345		74.3367	77.4733	58.3	59.65	62.4967		0.577747	0.000107786	9.76099e-08	1.74824e-06		0.718984	0.00106734	2.53839e-06	4.21335e-05		down	down	down	down		no	no	no	no
	M	acyl-CoA oxidase	ACOX	CRYCO0009139	-0.0614773	-0.234171	-0.409199	-0.312283		74.3367	76.0633	66.7233	62.1133	65.3067		0.375233	0.00227333	5.59176e-08	4.95455e-05		0.583025	0.0122247	1.05856e-06	0.000567977		down	down	down	down		no	no	no	no
	S	acyl-CoA oxidase	ACOX	CRYCO0009139	-0.0546227	-0.290801	-0.442717	-0.344979		74.3367	75.7333	68.69	59.2067	64.34		0.474046	0.000154083	1.06708e-09	3.10806e-05		0.648243	0.000986062	2.52433e-08	0.000425302		down	down	down	down		no	no	no	no
					Log2fc					TPM						pvalue					padjust					regulate					significant
Pathway	Group	Gene name	Abbreviation	gene_id	6h	12h	24h	48h		0h	6h	12h	24h	48h		6h	12h	24h	48h		6h	12h	24h	48h		6h	12h	24h	48h		6h	12h	24h	48h
TAG biosynthesis
	G	glycerol-3-phosphate O-acyltransferase	GPAT	CRYCO00027570	0.420811	0.625644	0.101312	-0.25282		20.26	30.7867	34.4467	24.4333	18.05		0.0212958	0.000809781	0.624629	0.249554		0.0612192	0.00567119	0.825178	0.534694		up	up	up	down		no	no	no	no
	M	glycerol-3-phosphate O-acyltransferase	GPAT	CRYCO00027570	0.290153	0.439666	0.213961	-0.17128		20.26	28.17	31.24	26.4467	17.3		0.104654	0.018326	0.261053	0.385866		0.251603	0.065735	0.466931	0.59395		up	up	up	down		no	no	no	no
	S	glycerol-3-phosphate O-acyltransferase	GPAT	CRYCO00027570	0.295758	0.555412	0.249845	-0.232076		20.26	28.8133	34.4433	26.8833	16.87		0.121827	0.00192899	0.162883	0.261457		0.256028	0.00875714	0.347229	0.501765		up	up	up	down		no	no	no	no
	G	glycerol-3-phosphate acyltransferase	GPAT	CRYCO00014008	-0.289784	-0.125171	-0.558602	-0.815316		27.41	25.2033	27.7333	21.5733	17.0733		0.00164846	0.319392	7.72875e-08	7.75739e-12		0.00730635	0.524652	2.06022e-06	4.79118e-10		down	down	down	down		no	no	no	no
	M	glycerol-3-phosphate acyltransferase	GPAT	CRYCO00014008	-0.32612	-0.265531	-0.467653	-0.366403		27.41	24.3267	26.2967	21.9233	22.4067		0.00060729	0.00449399	2.38105e-07	0.00216092		0.00378468	0.0178352	3.80797e-06	0.0155517		down	down	down	down		no	no	no	no
	S	glycerol-3-phosphate acyltransferase	GPAT	CRYCO00014008	-0.452628	-0.251313	-0.511598	-0.222615		27.41	22.0767	25.0333	21.7033	23.6867		3.44851e-06	0.0072291	2.58077e-07	0.0257136		5.24808e-05	0.0315582	4.25472e-06	0.093763		down	down	down	down		no	no	no	no
	G	glycerol-3-phosphate acyltransferase	GPAT	CRYCO0001304	0.109366	0.639409	0.355793	0.337303		24.2833	29.5667	41.8167	35.9767	33.43		0.351207	1.29394e-06	0.00377096	0.00498944		0.514724	2.38643e-05	0.0258828	0.0377009		up	up	up	up		no	no	no	no
	M	glycerol-3-phosphate acyltransferase	GPAT	CRYCO0001304	-0.113403	-0.468386	-0.623603	-0.632773		24.2833	25.3267	20.2967	17.5033	16.2733		0.373216	0.000257268	8.80526e-07	1.24e-06		0.556227	0.00153752	1.2532e-05	2.4e-05		down	down	down	down		no	no	no	no
	S	glycerol-3-phosphate acyltransferase	GPAT	CRYCO0001304	-0.168508	-0.476544	-0.595438	-0.423361		24.2833	24.0267	19.2	18.1433	18.0833		0.158506	0.000159565	4.24178e-06	0.00105133		0.335276	0.00130127	5.40898e-05	0.00760691		down	down	down	down		no	no	no	no
	G	lysophosphatidic acid acyltransferase	LPAT	CRYCO00021586	-0.260751	-0.186082	-0.307622	-0.336646		26.7267	25.0267	25.8933	25.0567	23.3133		0.000929828	0.0611108	0.000669705	0.000153028		0.0045073	0.167732	0.00625851	0.00215056		down	down	down	down		no	no	no	no
	M	lysophosphatidic acid acyltransferase	LPAT	CRYCO00021586	-0.21478	-0.111302	-0.348257	-0.288992		26.7267	25.2767	26.7667	23.63	22.1367		0.00591463	0.160589	1.918e-05	0.00102859		0.0284469	0.328201	0.000208519	0.00747006		down	down	down	down		no	no	no	no
	S	lysophosphatidic acid acyltransferase	LPAT	CRYCO00021586	-0.202876	-0.355193	-0.397198	-0.248924		26.7267	25.73	24.0367	22.4	23.9033		0.0184794	3.4218e-05	4.16522e-07	0.00274847		0.0610344	0.000262137	6.32436e-06	0.0189102		down	down	down	down		no	no	no	no
	G	phosphohydrolase	PAP	CRYCO00050892	-0.37061	-0.25604	-0.399484	0.258155		16.69	14.6367	15.5067	14.6633	21.7133		0.0357107	0.233692	0.0290705	0.133768		0.0928229	0.427856	0.123803	0.376041		down	down	down	up		no	no	no	no
	M	phosphohydrolase	PAP	CRYCO00050892	-0.530248	-0.594142	-0.286671	-0.0771269		16.69	13.1733	12.8367	15.2667	16.2633		0.00384655	0.00108072	0.0970278	0.659467		0.0174451	0.00533941	0.241773	0.826142		down	down	down	down		no	no	no	no
	S	phosphohydrolase	PAP	CRYCO00050892	-0.441488	-0.474023	-0.4345	-0.0952448		16.69	13.7767	13.3467	14.0067	15.4833		0.0146333	0.0166342	0.0161038	0.612806		0.0585753	0.0609084	0.0624563	0.776266		down	down	down	down		no	no	no	no
	G	phosphatidate phosphatase;diacylglycerol diphosphate phosphatase	PAP	CRYCO00029480	-0.140338	-0.0533502	-0.132291	-0.0280919		78.5967	88.4433	86.1533	85.3433	83.83		0.160874	0.679252	0.249798	0.80992		0.293885	0.819003	0.511163	0.924292		down	down	down	down		no	no	no	no
	M	phosphatidate phosphatase;diacylglycerol diphosphate phosphatase	PAP	CRYCO00029480	-0.102852	-0.215783	-0.21143	0.240398		78.5967	83.44	79.25	81.4133	94.1267		0.294191	0.0341771	0.0382015	0.0211154		0.501592	0.106638	0.121049	0.0811314		down	down	down	up		no	no	no	no
	S	phosphatidate phosphatase;diacylglycerol diphosphate phosphatase	PAP	CRYCO00029480	-0.184896	-0.315432	-0.232223	0.0906161		78.5967	82.63	76.4	78.6	88.8367		0.0906156	0.00303631	0.0213074	0.397031		0.206441	0.0128731	0.0786182	0.636446		down	down	down	up		no	no	no	no
	G	2-acylglycerol O-acyltransferase 2	MGAT	CRYCO00049376	0.861291	0.708149	0.155672	0.159162		26.4567	61.9867	49.6133	36.4533	25.2133		1.14355e-08	3.81631e-06	0.318124	0.306032		2.01025e-07	6.09336e-05	0.586401	0.595271		up	up	up	up		no	no	no	no
	M	2-acylglycerol O-acyltransferase 2	MGAT	CRYCO00049376	0.654254	0.486907	0.285714	0.299035		26.4567	52.2	42.41	37.59	27.9333		7.7152e-07	0.00109968	0.0414899	0.0391939		1.39643e-05	0.00673977	0.128909	0.127882		up	up	up	up		no	no	no	no
	S	2-acylglycerol O-acyltransferase 2	MGAT	CRYCO00049376	0.667566	0.505736	0.306598	0.307612		26.4567	56.77	47.8367	40.3033	28.26		1.56337e-06	0.000338571	0.0283603	0.0335896		2.18753e-05	0.0019561	0.0980812	0.129099		up	up	up	up		no	no	no	no
	G	diacylglycerol kinase (ATP)	DGK	CRYCO00043427	0.383361	0.62814	0.306468	0.143828		13.6467	19.6867	23.1933	19.5367	16.55		0.00068636	7.81674e-07	0.0119217	0.272936		0.00348494	1.5468e-05	0.0638429	0.561329		up	up	up	up		no	no	no	no
	M	diacylglycerol kinase (ATP)	DGK	CRYCO00043427	0.20766	0.432526	0.408914	-0.0965412		13.6467	17.3167	19.96	20.26	12.8833		0.064442	0.000154331	0.000585311	0.476637		0.178289	0.00126483	0.00403562	0.673619		up	up	up	down		no	no	no	no
	S	diacylglycerol kinase (ATP)	DGK	CRYCO00043427	0.295844	0.531033	0.354413	-0.0242197		13.6467	18.5667	22.6867	19.1933	14.1467		0.0122868	4.58656e-06	0.00148765	0.864141		0.0442375	4.42007e-05	0.00893873	0.939276		up	up	up	down		no	no	no	no
	G	diacylglycerol O-acyltransferase 2, plant	DGAT2	CRYCO00024821	0.622896	0.550452	0.327206	-0.0410755		14.5233	24.7633	23.3733	20.8467	15.56		4.85126e-10	2.94874e-06	0.0061523	0.772522		1.12344e-08	4.87061e-05	0.0380612	0.906727		up	up	up	down		no	no	no	no
	M	diacylglycerol O-acyltransferase 2, plant	DGAT2	CRYCO00024821	0.437344	0.495709	0.391792	-0.178462		14.5233	21.2333	21.7333	20.9333	12.8733		1.28433e-05	1.40867e-06	0.000134804	0.13703		0.00016476	2.09025e-05	0.00114518	0.307575		up	up	up	down		no	no	no	no
	S	diacylglycerol O-acyltransferase 2, plant	DGAT2	CRYCO00024821	0.598154	0.454595	0.248894	-0.0601707		14.5233	23.94	22.53	18.8233	14.7467		1.89859e-08	1.15758e-05	0.0138675	0.608093		4.24077e-07	0.000101017	0.0561616	0.795337		up	up	up	down		no	no	no	no
	G	diacylglycerol O-acyltransferase	DGAT	CRYCO00060597	0.0816195	0.247635	0.0424117	0.0194289		16.5833	19.6367	21.6133	19.6967	18.3667		0.488218	0.0721844	0.73607	0.880997		0.644829	0.18897	0.885163	0.953551		up	up	up	up		no	no	no	no
	M	diacylglycerol O-acyltransferase	DGAT	CRYCO00060597	0.0847656	-0.0935381	-0.188713	-0.266758		16.5833	19.5133	17.84	16.05	14.4633		0.478328	0.443727	0.12149	0.0341779		0.651946	0.613781	0.283166	0.130845		up	down	down	down		no	no	no	no
	S	diacylglycerol O-acyltransferase	DGAT	CRYCO00060597	0.0119106	-0.107243	-0.138003	-0.275948		16.5833	18.37	16.69	16.9233	13.7433		0.919375	0.371506	0.250452	0.0324745		0.960767	0.572433	0.454423	0.111412		up	down	down	down		no	no	no	no
	G	diacylglycerol O-acyltransferase	DGAT	CRYCO00022105	0.127082	0.511172	0.120623	0.0180063		27.2667	34.5967	41.68	33.8333	30.51		0.247438	0.000109614	0.304048	0.876396		0.401863	0.00108118	0.571641	0.9519		up	up	up	up		no	no	no	no
	M	diacylglycerol O-acyltransferase	DGAT	CRYCO00022105	-0.111214	0.156495	0.0169763	0.129194		27.2667	27.94	34.86	30.81	31.0133		0.351275	0.186472	0.876381	0.257928		0.534661	0.337412	0.939454	0.497521		down	up	up	up		no	no	no	no
	S	diacylglycerol O-acyltransferase	DGAT	CRYCO00022105	-0.00459778	0.143023	-0.0601422	0.0969311		27.2667	29.3633	32.77	29.4267	29.6667		0.966401	0.220604	0.616521	0.407557		0.983841	0.408638	0.781441	0.61376		down	up	down	up		no	no	no	no
	G	diacylglycerol O-acyltransferase	DGAT	CRYCO00046555	-0.103389	0.0967671	0.0178473	0.190415		50.5667	53.2233	61.0967	59.8733	61.2		0.238147	0.379901	0.851912	0.0421373		0.391125	0.586218	0.941272	0.178241		down	up	up	up		no	no	no	no
	M	diacylglycerol O-acyltransferase	DGAT	CRYCO00046555	-0.233669	-0.218089	-0.196966	0.117677		50.5667	49.8967	49.9333	47.59	55.5133		0.0148387	0.0141156	0.0330412	0.221059		0.0512046	0.0459713	0.110297	0.453185		down	down	down	up		no	no	no	no
	S	diacylglycerol O-acyltransferase	DGAT	CRYCO00046555	-0.20196	-0.0879306	-0.150842	0.156164		50.5667	48.3733	53.05	52.1167	53.3167		0.0186788	0.307984	0.0792273	0.0835933		0.070625	0.507912	0.205963	0.219154		down	down	down	up		no	no	no	no
	G	diacylglycerol O-acyltransferase	DGAT	CRYCO00024045	-0.424892	-0.108355	-0.199759	-0.140723		28.5267	26.3	30.0567	29.9967	28.85		1.11e-06	0.328677	0.0496027	0.133424		1.26e-05	0.534685	0.181006	0.375471		down	down	down	down		no	no	no	no
	M	diacylglycerol O-acyltransferase	DGAT	CRYCO00024045	-0.410118	-0.126189	0.0952391	0.107245		28.5267	25.6667	31.0633	34.3767	32.3333		6.11967e-06	0.174212	0.270312	0.24728		7.18426e-05	0.321237	0.484479	0.484736		down	down	up	up		no	no	no	no
	S	diacylglycerol O-acyltransferase	DGAT	CRYCO00024045	-0.288297	-0.0148489	0.0854427	0.141204		28.5267	27.32	30.81	34.4633	32.3667		0.00053354	0.862311	0.319596	0.130371		0.00399081	0.927408	0.530911	0.297554		down	down	up	up		no	no	no	no
	G	diacylglycerol O-acyltransferase	DGAT	CRYCO00044805	-0.260394	-0.081588	-0.0491426	-0.109305		11.6567	10.9267	12.0767	12.9	11.86		0.0244883	0.540223	0.679041	0.34897		0.0685906	0.720188	0.855721	0.636843		down	down	down	down		no	no	no	no
	M	diacylglycerol O-acyltransferase	DGAT	CRYCO00044805	-0.183615	-0.303911	-0.190135	-0.0813845		11.6567	11.25	10.84	11.33	11.76		0.135477	0.0103753	0.122331	0.503579		0.276476	0.0357472	0.284625	0.723832		down	down	down	down		no	no	no	no
	S	diacylglycerol O-acyltransferase	DGAT	CRYCO00044805	-0.128416	-0.14447	-0.148644	0.049199		11.6567	11.67	11.46	11.6867	12.21		0.247095	0.215022	0.189797	0.666424		0.449148	0.401478	0.378693	0.81321		down	down	down	up		no	no	no	no

## Sheet: Starch 
					Log2fc					TPM						pvalue					padjust					regulate					significant
Pathway	Group	Gene name	Abbreviation	gene_id	6h	12h	24h	48h		0h	6h	12h	24h	48h		6h	12h	24h	48h		6h	12h	24h	48h		6h	12h	24h	48h		6h	12h	24h	48h
Starch biosynthesis	G	glucose-6-phosphate isomerase	GK	CRYCO00040307	-0.219116	-0.536838	-0.343372	-0.267125		51.42	58.2567	36.53	42.4067	43.12		0.101138	0.000448326	0.0116066	0.0613182		0.207985	0.00349576	0.0625327	0.229264		down	down	down	down		no	no	no	no
	M	glucose-6-phosphate isomerase	GK	CRYCO00040307	-0.176544	-0.549193	-0.399817	-0.279728		51.42	55.1067	43.2	45.4533	41.5433		0.182791	8.56244e-05	0.00632211	0.0482269		0.343237	0.000588638	0.029676	0.166357		down	down	down	down		no	no	no	no
	S	glucose-6-phosphate isomerase	GK	CRYCO00040307	-0.126257	-0.493562	-0.379288	-0.362986		51.42	59.34	44.7533	55.0633	36.7233		0.323504	0.000376398	0.00472491	0.013503		0.532087	0.00271881	0.0230523	0.0578159		down	down	down	down		no	no	no	no
	G	phosphoglucomutase	PGM	CRYCO00042468	0.534129	0.455471	0.0646198	-0.0290339		57.43	96.2733	87.7867	70.4933	62.4167		2.43283e-16	7.94819e-07	0.411622	0.712159		1.60374e-14	1.56957e-05	0.672516	0.879275		up	up	up	down		no	no	no	no
	M	phosphoglucomutase	PGM	CRYCO00042468	0.410417	0.347479	-0.0518353	-0.0113253		57.43	85.95	85.15	61.83	61.28		8.58313e-08	1.62499e-06	0.468224	0.885235		1.64307e-06	1.74004e-05	0.673534	0.950069		up	up	down	down		no	no	no	no
	S	phosphoglucomutase	PGM	CRYCO00042468	0.359906	0.325857	0.0730923	0.0392356		57.43	82.0367	78.8833	68.64	60.39		1.04069e-08	2.39594e-06	0.283732	0.583346		2.93188e-07	3.34463e-05	0.492441	0.755902		up	up	up	up		no	no	no	no
	G	starch synthase	SSS	CRYCO00063635	0.19903	-0.357115	-0.618391	-0.889909		12.4733	15.97	10.66	9.38667	7.37		0.127425	0.0381927	9.99562e-05	4.2312e-08		0.247002	0.118753	0.00124334	1.42161e-06		up	down	down	down		no	no	no	no
	M	starch synthase	SSS	CRYCO00063635	0.270487	0.298459	0.299882	0.159635		12.4733	16.59	17.54	16.8367	14.7		0.0425419	0.0258782	0.0190601	0.281164		0.116824	0.0749888	0.0721734	0.522774		up	up	up	up		no	no	no	no
	S	starch synthase	SSS	CRYCO00063635	0.147304	0.405381	0.266817	-0.0157433		12.4733	15.0833	17.79	16.7933	12.4333		0.250618	0.00173223	0.0502012	0.918929		0.453156	0.00980067	0.148118	0.960805		up	up	up	down		no	no	no	no
	G	starch synthase;granule-bound starch synthase	SSS;GBSS	CRYCO00045414	-0.764482	-0.407052	-0.560821	-0.485075		18.3	12.2167	15.06	15.26	15.5167		3.25e-13	0.00452992	4.92808e-06	4.40455e-05		1.34e-11	0.0230067	8.62494e-05	0.000726857		down	down	down	down		no	no	no	no
	M	starch synthase;granule-bound starch synthase	SSS;GBSS	CRYCO00045414	-0.563314	-0.289318	0.152807	0.319051		18.3	13.9833	17.13	21.6467	23.44		1.47255e-07	0.00657151	0.135383	0.00760918		2.67633e-06	0.024471	0.305862	0.0423168		down	down	up	up		no	no	no	no
	S	starch synthase;granule-bound starch synthase	SSS;GBSS	CRYCO00045414	-0.477261	-0.197074	0.0186493	0.282258		18.3	14.5867	16.89	20.2767	21.6067		3.2027e-06	0.0587363	0.864736	0.0101262		4.91688e-05	0.160003	0.934051	0.046388		down	down	up	up		no	no	no	no
	G	granule-bound starch synthase	GBSS	CRYCO00040624	1.13086	1.11723	0.9921	0.539019		30.92	73.4033	72.4967	70.05	49.2933		6.06368e-34	1.62349e-16	1.72372e-17	8.89653e-07		3.42874e-31	2.60783e-14	1.81472e-15	2.28665e-05		up	up	up	up		yes	yes	no	no
	M	granule-bound starch synthase	GBSS	CRYCO00040624	0.916221	0.781274	0.19812	-0.302158		30.92	63.6867	60.0367	40.08	26.5633		1.5769e-20	1.09238e-15	0.0424632	0.00786453		2.65746e-18	5.61493e-14	0.133112	0.0434379		up	up	up	down		no	no	no	no
	S	granule-bound starch synthase	GBSS	CRYCO00040624	0.775449	0.643863	0.349098	-0.474706		30.92	59.1633	51.4967	45.35	23.2367		4.83513e-17	7.83946e-11	0.000364661	2.6351e-05		5.51871e-15	2.86374e-09	0.00269066	0.000327524		up	up	up	down		no	no	no	no
	G	1,4-alpha-glucan branching enzyme	GBE1	CRYCO00017322	0.37446	0.278378	0.0565055	-0.14957		20.2	29.3567	26.94	24.3067	19.9667		0.000283482	0.020324	0.623419	0.223011		0.00163813	0.0737973	0.824716	0.502528		up	up	up	down		no	no	no	no
	M	1,4-alpha-glucan branching enzyme	GBE1	CRYCO00017322	0.355799	0.600414	0.459036	0.222094		20.2	28.7033	35.18	30.6067	24.7967		0.000783638	9.50635e-08	3.08847e-06	0.0440326		0.00469223	1.31649e-06	3.90849e-05	0.156425		up	up	up	up		no	no	no	no
	S	1,4-alpha-glucan branching enzyme	GBE1	CRYCO00017322	0.352693	0.648232	0.542291	0.362186		20.2	28.3433	34.31	33.0567	26.1333		0.000330228	4.40825e-10	2.58275e-07	0.000635586		0.00267262	1.40261e-08	4.25483e-06	0.00501073		up	up	up	up		no	no	no	no
	G	1,4-alpha-glucan branching enzyme	GBE1	CRYCO00073279	1.09763	0.465491	0.462013	-0.0224291		14.21	30.4033	21.1133	24.42	13.51		4.94472e-24	0.00375997	0.000961673	0.892266		8.768e-22	0.0198218	0.00849927	0.958313		up	up	up	down		yes	no	no	no
	M	1,4-alpha-glucan branching enzyme	GBE1	CRYCO00073279	0.998785	0.813521	0.516077	0.338418		14.21	28.9467	26.3467	21.7767	17.7767		7.44327e-19	2.84009e-12	1.63848e-05	0.0109584		9.70047e-17	8.77157e-11	0.000174738	0.0559862		up	up	up	up		no	no	no	no
	S	1,4-alpha-glucan branching enzyme	GBE1	CRYCO00073279	0.773682	0.623966	0.550248	0.161581		14.21	26.2967	22.2667	24.13	15.14		1.24347e-12	8.13619e-08	4.39156e-06	0.26982		7.17178e-11	1.63044e-06	5.58213e-05	0.477741		up	up	up	up		no	no	no	no
	G	1,4-alpha-glucan branching enzyme	GBE1	CRYCO00044001	0.0910727	0.00883685	-0.173035	-0.156927		54.59	65.3333	60.6	56.2167	53.77		0.234841	0.930908	0.0528798	0.0630232		0.387187	0.966067	0.189399	0.233638		up	up	down	down		no	no	no	no
	M	1,4-alpha-glucan branching enzyme	GBE1	CRYCO00044001	-0.0370963	-0.317146	-0.37247	-0.280049		54.59	59.1	50.4633	46.56	47.5633		0.662715	0.000238429	1.66513e-06	0.000527301		0.794841	0.00143737	2.2333e-05	0.00488764		down	down	down	down		no	no	no	no
	S	1,4-alpha-glucan branching enzyme	GBE1	CRYCO00044001	0.0319786	-0.200052	-0.334231	-0.212862		54.59	61.4233	51.6133	48.6867	47.5433		0.66456	0.0110061	5.40081e-05	0.009696		0.809207	0.0439931	0.000518177	0.0448589		up	down	down	down		no	no	no	no
	G	1,4-alpha-glucan branching enzyme	GBE1	CRYCO00073942	0.46349	0.227261	0.0951143	-0.0711448		13.9567	21.5933	17.9567	17.2633	14.49		0.000256755	0.122787	0.543938	0.613506		0.00150449	0.274614	0.774062	0.82855		up	up	up	down		no	no	no	no
	M	1,4-alpha-glucan branching enzyme	GBE1	CRYCO00073942	0.371559	0.484495	0.206525	-0.0823581		13.9567	20.1633	22.47	17.7733	13.7533		0.00420836	0.000198886	0.108268	0.575584		0.0187485	0.00123034	0.261042	0.77401		up	up	up	down		no	no	no	no
	S	1,4-alpha-glucan branching enzyme	GBE1	CRYCO00073942	0.359761	0.430857	0.22412	-0.078886		13.9567	19.7633	20.52	18.3167	13.2467		0.00483318	0.000756391	0.0916879	0.610791		0.0242657	0.00491932	0.228477	0.775164		up	up	up	down		no	no	no	no
	G	1,4-alpha-glucan branching enzyme	GBE1	CRYCO00073939	0.395845	0.30729	0.0508456	0.135269		19.32	28.4967	26.26	23.06	23.03		0.00507311	0.0522965	0.742274	0.39368		0.0188298	0.15008	0.888079	0.675565		up	up	up	up		no	no	no	no
	M	1,4-alpha-glucan branching enzyme	GBE1	CRYCO00073939	0.475798	0.364529	0.392505	-0.0753359		19.32	30.09	28.5933	27.9633	18.92		0.00249668	0.0118895	0.00401436	0.652407		0.0122618	0.0399858	0.0204757	0.822187		up	up	up	down		no	no	no	no
	S	1,4-alpha-glucan branching enzyme	GBE1	CRYCO00073939	0.467406	0.316307	0.339404	0.0442384		19.32	29.56	26.3533	27.4333	19.7867		0.000684857	0.0258873	0.0146531	0.773773		0.0048791	0.0860166	0.057802	0.879909		up	up	up	up		no	no	no	no
	G	1,4-alpha-glucan branching enzyme	GBE1	CRYCO00040342	0.0232605	0.00208453	-0.0399735	0.0732479		28.9033	29.47	30.6167	30.4233	31.4533		0.792794	0.986855	0.681484	0.428768		0.875376	0.9934	0.857193	0.704589		up	up	down	up		no	no	no	no
	M	1,4-alpha-glucan branching enzyme	GBE1	CRYCO00040342	0.134406	0.0475876	0.0241079	-0.0789119		28.9033	31.3867	30.7	30.76	29.78		0.146808	0.598648	0.779106	0.401808		0.293196	0.742286	0.886555	0.64035		up	up	up	down		no	no	no	no
	S	1,4-alpha-glucan branching enzyme	GBE1	CRYCO00040342	0.0648696	0.0932409	0.0699277	0.039601		28.9033	31.49	30.8133	32.5867	31.01		0.446026	0.311915	0.428352	0.688866		0.646188	0.512141	0.634212	0.82805		up	up	up	up		no	no	no	no
	G	1,4-alpha-glucan branching enzyme	GBE1	CRYCO00066021	-0.315869	-0.345473	-0.272268	-0.125722		22.5333	22.2467	21.4367	23.1867	23.97		0.00012807	0.00289164	0.00551765	0.165224		0.000824598	0.0160428	0.0349797	0.425389		down	down	down	down		no	no	no	no
	M	1,4-alpha-glucan branching enzyme	GBE1	CRYCO00066021	-0.295832	-0.312596	-0.0601664	-0.0260706		22.5333	21.98	22.24	24.6567	23.4433		0.00080507	0.000801162	0.473298	0.765769		0.00479763	0.0041372	0.677601	0.887969		down	down	down	down		no	no	no	no
	S	1,4-alpha-glucan branching enzyme	GBE1	CRYCO00066021	-0.15122	-0.176448	-0.0498748	0.185845		22.5333	24.14	22.11	25.1267	25.1		0.0644534	0.0495037	0.564131	0.0362964		0.178304	0.141047	0.744292	0.120939		down	down	down	up		no	no	no	no
					Log2fc					TPM						pvalue					padjust					regulate					significant
Pathway	Group	Gene name	Abbreviation	gene_id	6h	12h	24h	48h		0h	6h	12h	24h	48h		6h	12h	24h	48h		6h	12h	24h	48h		6h	12h	24h	48h		6h	12h	24h	48h
Starch degradation	G	isoamylase	ISA	CRYCO00012857	1.6262	1.03546	0.822416	0.232189		11.5333	40.5967	26.1533	23.2867	14.8467		7.47171e-31	8.59475e-11	1.82419e-07	0.236978		2.97064e-28	4.64874e-09	4.47426e-06	0.519742		up	up	up	up		yes	yes	no	no
	M	isoamylase	ISA	CRYCO00012857	1.48232	1.48471	1.32001	1.02036		11.5333	36.29	36.4667	32.16	25.8667		1.72387e-25	1.00703e-25	5.31368e-21	5.91675e-09		5.26555e-23	1.70955e-23	4.06554e-19	1.82012e-07		up	up	up	up		yes	yes	yes	yes
	S	isoamylase	ISA	CRYCO00012857	1.19841	1.36938	1.32843	0.72018		11.5333	28.4967	32.58	31.67	19.2033		5.85382e-18	6.75696e-22	1.33206e-20	9.76601e-06		7.56521e-16	1.01682e-19	1.15696e-18	0.000137993		up	up	up	up		yes	yes	yes	no
	G	alpha-amylase	AMYA	CRYCO00019432	0.36679	0.177793	-0.35118	-0.496105		17.03	24.2967	21.12	15.56	13.1733		1.30041e-05	0.102901	0.000313934	1.35973e-07		0.000111639	0.243051	0.00330434	4.14596e-06		up	up	down	down		no	no	no	no
	M	alpha-amylase	AMYA	CRYCO00019432	0.289827	0.365783	-0.0229069	-0.161356		17.03	22.9233	25.1367	18.67	16.3567		0.00296478	3.02852e-05	0.798497	0.086554		0.0141168	0.000235625	0.89739	0.248724		up	up	down	down		no	no	no	no
	S	alpha-amylase	AMYA	CRYCO00019432	0.225368	0.429431	0.160034	-0.0349425		17.03	21.68	24.0167	21.43	16.8067		0.00572284	6.73536e-07	0.0662293	0.715471		0.027738	1.07689e-05	0.181075	0.844864		up	up	up	down		no	no	no	no
	G	alpha-amylase	AMYA	CRYCO00022636	0.45663	-0.0229797	0.132779	-0.163674		16.77	25.4833	18.28	21.2033	16.3333		0.000824309	0.888251	0.404628	0.375943		0.00406691	0.94373	0.666042	0.661141		up	down	up	down		no	no	no	no
	M	alpha-amylase	AMYA	CRYCO00022636	0.437073	0.357145	0.204856	0.00506534		16.77	24.5967	24.4133	21.1967	17.7933		0.00189768	0.0119066	0.156236	0.973672		0.00978454	0.04002	0.337516	0.990473		up	up	up	up		no	no	no	no
	S	alpha-amylase	AMYA	CRYCO00022636	0.243738	0.252195	0.137618	-0.280354		16.77	21.87	21.6267	20.4133	14.4267		0.0771032	0.0999637	0.349042	0.114725		0.202896	0.235295	0.561012	0.273085		up	up	up	down		no	no	no	no
	G	alpha-amylase	AMYA	CRYCO0008853	-0.345618	-0.253355	-0.3006	-0.218716		14.97	14.13	14.2767	14.3133	14.2767		0.000459292	0.0289091	0.00393012	0.0434459		0.00247578	0.0966557	0.0267986	0.181764		down	down	down	down		no	no	no	no
	M	alpha-amylase	AMYA	CRYCO0008853	-0.223517	-0.051678	0.107133	-0.00113833		14.97	14.5567	16.8067	17.7633	15.7833		0.0261809	0.592542	0.243143	0.990706		0.0802795	0.737479	0.452889	0.996611		down	down	up	down		no	no	no	no
	S	alpha-amylase	AMYA	CRYCO0008853	-0.124809	0.0707256	0.087883	0.055364		14.97	15.96	17.2633	17.8733	15.6333		0.177696	0.460013	0.353178	0.559013		0.361467	0.650939	0.56489	0.737803		down	up	up	up		no	no	no	no
	G	alpha-amylase	AMYA	CRYCO00054274	-0.382947	-0.182249	0.00371433	0.217311		20.41	17.45	20.08	23.61	26.06		0.00314467	0.213321	0.978677	0.101958		0.012643	0.402478	0.990944	0.317908		down	down	up	up		no	no	no	no
	M	alpha-amylase	AMYA	CRYCO00054274	-0.178932	-0.195171	0.0898051	0.0373867		20.41	20.0667	20.4967	23.9433	22.23		0.163756	0.137823	0.460193	0.778752		0.317306	0.27053	0.666849	0.894665		down	down	up	up		no	no	no	no
	S	alpha-amylase	AMYA	CRYCO00054274	-0.13627	-0.0199263	0.040215	0.189847		20.41	20.45	21.99	23.7133	23.2567		0.291224	0.875549	0.745985	0.134255		0.498341	0.935694	0.865925	0.303525		down	down	up	up		no	no	no	no
	G	glucoamylase	SGA1	CRYCO00064468	-0.0590897	0.157311	0.0907459	0.105567		10.0733	10.84	12.3733	12.4567	11.9467		0.585354	0.233223	0.422062	0.419795		0.725046	0.427248	0.68105	0.697083		down	up	up	up		no	no	no	no
	M	glucoamylase	SGA1	CRYCO00064468	-0.0292217	0.00783471	0.0764471	0.172629		10.0733	10.94	11.66	11.7367	12.0467		0.803947	0.942552	0.472381	0.128228		0.88971	0.968757	0.676843	0.322588		down	up	up	up		no	no	no	no
	S	glucoamylase	SGA1	CRYCO00064468	0.0757058	0.0880368	0.0487522	0.120508		10.0733	11.6367	11.5833	11.71	11.0867		0.483394	0.418156	0.652686	0.269204		0.677212	0.615109	0.806758	0.477013		up	up	up	up		no	no	no	no
	G	glucoamylase	SGA1	CRYCO00038879	-0.00293141	-0.0935268	-0.0935268	-0.153301		12.9233	14.34	12.7333	12.7333	12.9867		0.979529	0.507272	0.507272	0.205765		0.989229	0.694863	0.694863	0.48077		down	down	down	down		no	no	no	no
	M	glucoamylase	SGA1	CRYCO00038879	-0.124094	-0.685213	-0.594007	-0.36064		12.9233	12.23	8.93667	9.34	10.59		0.321311	4.10639e-08	1.35379e-06	0.00747533		0.504285	6.12523e-07	1.85389e-05	0.0417228		down	down	down	down		no	no	no	no
	S	glucoamylase	SGA1	CRYCO00038879	0.00662365	-0.350951	-0.402844	-0.32343		12.9233	14.2133	10.7667	10.6933	10.5033		0.95224	0.00358851	0.00140292	0.0224097		0.977123	0.0178341	0.00849113	0.0848433		up	down	down	down		no	no	no	no

## Sheet: Glycolysis
					Log2fc					TPM						pvalue					padjust					regulate					significant
Pathway	Group	Gene name	Abbreviation	gene_id	6h	12h	24h	48h		0h	6h	12h	24h	48h		6h	12h	24h	48h		6h	12h	24h	48h		6h	12h	24h	48h		6h	12h	24h	48h
Glycolysis metabolism
	G	glucokinase	GK	CRYCO00059504	-0.253393	-0.236653	-0.390479	-0.348481		19.4933	22.0433	22.24	19.3133	18.7767		0.00593338	0.0606576	0.000189384	0.00090394		0.0214381	0.166929	0.00215586	0.00958042		down	down	down	down		no	no	no	no
	M	glucokinase	GK	CRYCO00059504	-0.241056	-0.267738	-0.305433	-0.43403		19.4933	20.2233	20.1233	22.2667	15.75		0.0153385	0.00594558	0.0012567	0.00013011		0.0525712	0.0225335	0.00775036	0.00148446		down	down	down	down		no	no	no	no
	S	glucokinase	GK	CRYCO00059504	-0.267974	-0.204887	-0.268548	-0.372072		19.4933	19.5533	18.23	18.16	15.1433		0.00283024	0.0312485	0.00382449	0.000135659		0.0156899	0.0994322	0.0193661	0.00135401		down	down	down	down		no	no	no	no
	G	phosphoglucomutase	PGM	CRYCO00042468	0.534129	0.455471	0.0646198	-0.0290339		57.43	96.2733	87.7867	70.4933	62.4167		2.43283e-16	7.94819e-07	0.411622	0.712159		1.60374e-14	1.56957e-05	0.672516	0.879275		up	up	up	down		no	no	no	no
	M	phosphoglucomutase	PGM	CRYCO00042468	0.410417	0.347479	-0.0518353	-0.0113253		57.43	85.95	85.15	61.83	61.28		8.58313e-08	1.62499e-06	0.468224	0.885235		1.64307e-06	1.74004e-05	0.673534	0.950069		up	up	down	down		no	no	no	no
	S	phosphoglucomutase	PGM	CRYCO00042468	0.359906	0.325857	0.0730923	0.0392356		57.43	82.0367	78.8833	68.64	60.39		1.04069e-08	2.39594e-06	0.283732	0.583346		2.93188e-07	3.34463e-05	0.492441	0.755902		up	up	up	up		no	no	no	no
	G	glucose-6-phosphate isomerase	GPI	CRYCO00053062	0.604606	0.458353	0.266873	0.355585		35.76	60.9867	54.6433	49.2133	48.1433		1.7511e-11	6.07969e-05	0.0121962	0.000386661		5.28874e-10	0.00065845	0.0649929	0.00472656		up	up	up	up		no	no	no	no
	M	glucose-6-phosphate isomerase	GPI	CRYCO00053062	0.522953	0.463318	0.174467	0.442955		35.76	57.7433	56.5667	44.4867	48.6667		3.92425e-08	1.44234e-06	0.0817226	5.5088e-06		8.21705e-07	1.56223e-05	0.214104	9.21006e-05		up	up	up	up		no	no	no	no
	S	glucose-6-phosphate isomerase	GPI	CRYCO00053062	0.544321	0.517203	0.317302	0.394322		35.76	58.3767	56.7167	49.4633	45.6467		1.83467e-09	5.4204e-08	0.000684381	7.61498e-05		6.01918e-08	1.1263e-06	0.00461953	0.000825497		up	up	up	up		no	no	no	no
	G	6-phosphofructokinase	PFK	CRYCO00042867	0.311382	0.400182	0.157138	-0.0794026		19.1367	26.87	28.5933	24.82	20.0833		0.00141156	0.00388951	0.15438	0.549049		0.00641907	0.0203858	0.383684	0.789128		up	up	up	down		no	no	no	no
	M	6-phosphofructokinase	PFK	CRYCO00042867	0.146768	0.0198247	-0.87067	-1.01597		19.1367	23.94	22.4933	11.5167	9.44		0.196198	0.854541	1.48534e-16	6.2799e-10		0.360545	0.918175	7.89929e-15	2.24696e-08		up	up	down	down		no	no	no	yes
	S	6-phosphofructokinase	PFK	CRYCO00042867	-0.0165089	-0.275825	-0.795431	-1.41459		19.1367	21.1433	17.5133	12.5433	7.23667		0.862498	0.00969615	3.29898e-14	1.22692e-35		0.930745	0.0398146	1.56471e-12	2.64015e-33		down	down	down	down		no	no	no	yes
	G	6-phosphofructokinase	PFK	CRYCO00021604	0.468897	0.185362	-0.0421167	-0.190012		13.48	17.9433	14.8133	15.4633	10.7967		3.21e-06	0.138104	0.710612	0.0928522		3.24e-05	0.298752	0.873707	0.299486		up	up	down	down		no	no	no	no
	M	6-phosphofructokinase	PFK	CRYCO00021604	0.398744	0.257372	0.157934	0.00381206		13.48	17.5867	18.2433	14.58	13.3333		0.000145988	0.016706	0.120315	0.973575		0.00111813	0.0527877	0.281246	0.990428		up	up	up	up		no	no	no	no
	S	6-phosphofructokinase	PFK	CRYCO00021604	0.346609	0.207578	0.172577	0.0754579		13.48	16.9467	16.78	17.7767	12.01		0.00052199	0.0627626	0.0984747	0.481387		0.00392485	0.168109	0.240862	0.6774		up	up	up	up		no	no	no	no
	G	6-phosphofructokinase	PFK	CRYCO00041383	-0.408791	-0.284654	-0.0563966	-0.0667321		53.79	40.48	51.6267	54.4267	57.0067		0.000708914	0.0418412	0.657432	0.621006		0.00358301	0.127198	0.844307	0.83305		down	down	down	down		no	no	no	no
	M	6-phosphofructokinase	PFK	CRYCO00041383	-0.562688	-0.699146	-0.680317	-0.500336		53.79	42.1333	48.38	44.27	49.2633		1.23389e-05	1.08436e-07	5.98019e-08	6.7833e-05		0.000131982	1.48362e-06	1.06748e-06	0.000843568		down	down	down	down		no	no	no	no
	S	6-phosphofructokinase	PFK	CRYCO00041383	-0.550108	-0.597682	-0.805808	-0.621429		53.79	42.51	51.3767	39.6767	45.2033		1.70857e-05	3.27602e-06	1.12995e-10	5.8275e-06		0.000209818	4.4049e-05	3.42252e-09	8.78025e-05		down	down	down	down		no	no	no	no
	G	6-phosphofructokinase	PFK	CRYCO00022158	-0.624868	-1.3162	-1.5524	-1.29141		28.1033	20.4433	12.4133	11.0933	12.6233		2.01e-09	9.97727e-13	3.68706e-46	4.76008e-27		4.15e-08	8.26283e-11	3.39649e-43	1.03878e-24		down	down	down	down		no	yes	yes	yes
	M	6-phosphofructokinase	PFK	CRYCO00022158	-0.360966	-0.411506	-0.258658	-0.197813		28.1033	24.3033	24.3033	25.8833	25.8933		0.000138522	8.93643e-06	0.00408527	0.0472391		0.00107118	8.05376e-05	0.0207464	0.164053		down	down	down	down		no	no	no	no
	S	6-phosphofructokinase	PFK	CRYCO00022158	-0.207891	-0.218256	-0.325792	-0.25152		28.1033	26.7467	26.1767	25.1467	23.8367		0.0135874	0.0209655	0.000881767	0.00874077		0.0553271	0.0730296	0.00574367	0.0413401		down	down	down	down		no	no	no	no
	G	6-phosphofructokinase	PFK	CRYCO00076378	-0.173963	-0.206095	-0.0792717	-0.115641		25.6067	25.6667	24.5567	27.7167	25.57		0.210229	0.190679	0.643708	0.440834		0.357376	0.373218	0.836753	0.713921		down	down	down	down		no	no	no	no
	M	6-phosphofructokinase	PFK	CRYCO00076378	-0.0940011	-0.519495	-0.132316	-0.124026		25.6067	27.2033	20.6933	26.03	24.06		0.524884	0.000333414	0.329733	0.387613		0.689862	0.00193048	0.547542	0.628356		down	down	down	down		no	no	no	no
	S	6-phosphofructokinase	PFK	CRYCO00076378	-0.00157963	-0.299179	0.0614265	0.0453299		25.6067	28.6167	23.1067	30.1433	26.1333		0.990539	0.0434482	0.667251	0.749472		0.995368	0.12787	0.815939	0.865943		down	down	up	up		no	no	no	no
	G	6-phosphofructokinase	PFK	CRYCO00069672	0.0517715	-0.388061	-0.774871	-0.60519		21.35	24.2267	17.46	13.9633	14.07		0.684058	0.0409222	8.69978e-08	5.43356e-05		0.799943	0.125065	2.29607e-06	0.000872491		up	down	down	down		no	no	no	no
	M	6-phosphofructokinase	PFK	CRYCO00069672	0.00611965	-0.636163	-0.698714	-0.804069		21.35	22.7067	15.1167	13.9467	11.6233		0.963995	5.8626e-06	2.19318e-07	2.40504e-08		0.981079	5.51351e-05	3.53061e-06	6.52237e-07		up	down	down	down		no	no	no	no
	S	6-phosphofructokinase	PFK	CRYCO00069672	0.0856091	-0.558061	-0.742367	-0.760049		21.35	23.8133	15.02	13.59	11.8367		0.501638	4.89032e-05	4.44621e-08	3.79111e-07		0.691562	0.000469169	8.60073e-07	7.63017e-06		up	down	down	down		no	no	no	no
	G	6-phosphofructokinase	PFK	CRYCO00080457	0.242623	0.337107	-0.161245	0.07475		13.66	19.54	20.32	15.71	17.51		0.0621236	0.0355804	0.263643	0.574385		0.143237	0.112688	0.526318	0.80524		up	up	down	up		no	no	no	no
	M	6-phosphofructokinase	PFK	CRYCO00080457	0.339474	0.166228	0.0183739	0.159753		13.66	21.17	18.9367	16.74	16.98		0.0104008	0.211356	0.89054	0.239241		0.038639	0.369419	0.947002	0.475226		up	up	up	up		no	no	no	no
	S	6-phosphofructokinase	PFK	CRYCO00080457	0.23739	0.222916	0.254964	0.381734		13.66	18.53	19.8933	21.4167	17.83		0.0685084	0.0904478	0.0464248	0.00392934		0.186135	0.219154	0.140032	0.0220515		up	up	up	up		no	no	no	no
	G	6-phosphofructokinase	PFK	CRYCO00035534	-0.566499	-0.367608	-0.476298	-0.0856284		51.3333	39.3367	44.5	39.82	50.4933		0.00376259	0.0941693	0.0223705	0.634811		0.0146834	0.228636	0.102505	0.839836		down	down	down	down		no	no	no	no
	M	6-phosphofructokinase	PFK	CRYCO00035534	-0.739723	-0.757656	-0.627242	0.0105028		51.3333	35.2967	35.27	36.1	47.1733		0.00214675	0.000142759	0.00266889	0.954767		0.0108172	0.000923896	0.0145905	0.98201		down	down	down	up		no	no	no	no
	S	6-phosphofructokinase	PFK	CRYCO00035534	-0.728914	-0.787983	-0.426898	0.0400899		51.3333	36.2567	34.1067	43.0867	48.19		0.00023398	0.000715961	0.0251806	0.824397		0.00199167	0.0046953	0.0881028	0.909056		down	down	down	up		no	no	no	no
	G	glucose-6-phosphate isomerase;enolase	GPI;ENO	CRYCO0001549	0.139649	-0.114733	-0.340467	-0.526042		105.377	137.087	114.197	99.05	80.9		0.0438953	0.219317	4.21967e-05	4.13928e-11		0.109345	0.409993	0.000582341	2.27999e-09		up	down	down	down		no	no	no	no
	M	glucose-6-phosphate isomerase;enolase	GPI;ENO	CRYCO0001549	0.0630543	-0.0091317	-0.229111	-0.293899		105.377	131.543	126.243	104.257	91.77		0.447498	0.902262	0.000884346	9.74327e-05		0.625092	0.94581	0.00577287	0.0011487		up	down	down	down		no	no	no	no
	S	glucose-6-phosphate isomerase;enolase	GPI;ENO	CRYCO0001549	0.0537767	0.0777047	-0.112055	-0.114906		105.377	124.637	124.21	113.74	95.9167		0.415672	0.292752	0.112292	0.125032		0.620239	0.491505	0.264298	0.289562		up	up	up	down		no	no	no	no
	G	glucose-6-phosphate isomerase;enolase	GPI;ENO	CRYCO0005119	0.376765	-0.179239	-0.609203	-1.32766		28.7767	42.11	28.0967	21.77	12.5333		0.000634228	0.175392	1.01447e-05	3.44159e-24		0.00326025	0.352448	0.000165571	6.13701e-22		up	down	down	down		no	no	no	yes
	M	glucose-6-phosphate isomerase;enolase	GPI;ENO	CRYCO0005119	0.23605	0.238781	0.319067	0.222143		28.7767	38.0433	39.2167	39.8	35.02		0.0388965	0.0382092	0.00256097	0.0470445		0.108868	0.102451	0.0140999	0.163651		up	up	up	up		no	no	no	no
	S	glucose-6-phosphate isomerase;enolase	GPI;ENO	CRYCO0005119	0.216625	0.350043	0.246885	0.408523		28.7767	37.09	40.24	38.4933	38.2133		0.0403336	0.00159773	0.028307	0.000435645		0.126336	0.00915443	0.0965292	0.00365244		up	up	up	up		no	no	no	no
	G	fructose-bisphosphate aldolase, class I	FBA	CRYCO00085395	1.17224	0.558746	0.875907	0.518484		26.1833	72.8033	44.23	60.5367	41.7933		1.23571e-47	1.90553e-07	2.53094e-20	1.06343e-07		1.74684e-44	4.51553e-06	3.62986e-18	3.2929e-06		up	up	up	up		yes	no	no	no
	M	fructose-bisphosphate aldolase, class I	FBA	CRYCO00085395	0.725644	0.251045	-0.328585	-0.145789		26.1833	50.25	38.6133	24.6733	25.86		2.73646e-15	0.00443573	0.000841924	0.215477		2.15704e-13	0.0176334	0.00553886	0.446122		up	up	down	down		no	no	no	no
	S	fructose-bisphosphate aldolase, class I	FBA	CRYCO00085395	0.581575	0.0600726	-0.365996	-0.434728		26.1833	46.0167	29.32	23.3633	20.5333		6.80621e-14	0.535679	4.22723e-05	2.10868e-06		4.85387e-12	0.712106	0.000417592	3.5506e-05		up	up	down	down		no	no	no	no
	G	fructose-bisphosphate aldolase, class I	FBA	CRYCO00012328	1.2388	1.50301	1.06853	0.959334		58.2967	177.367	194.017	145.487	133.447		1.23375e-29	2.41545e-31	3.84513e-18	2.92119e-16		4.33011e-27	2.82007e-28	4.36467e-16	2.92297e-14		up	up	up	up		yes	yes	yes	no
	M	fructose-bisphosphate aldolase, class I	FBA	CRYCO00012328	1.12759	1.12514	0.77538	0.856734		58.2967	186.063	162.417	104.673	107.617		2.06448e-21	6.94096e-23	4.74068e-12	6.46307e-13		3.89557e-19	8.59612e-21	1.52632e-10	3.35169e-11		up	up	up	up		yes	yes	no	no
	S	fructose-bisphosphate aldolase, class I	FBA	CRYCO00012328	1.0156	1.19238	0.894309	0.735255		58.2967	150.197	170.77	125.943	106.03		5.55831e-21	2.97079e-25	1.83966e-15	2.66744e-09		1.14088e-18	5.99848e-23	1.01025e-13	8.043e-08		up	up	up	up		yes	yes	no	no
	G	triosephosphate isomerase (TIM)	TIM	CRYCO0001396	0.178468	0.318185	0.0021081	0.17633		126.46	182.097	183.283	155.073	178.107		0.0150962	0.00156761	0.981094	0.0622038		0.0462764	0.0097821	0.992112	0.231593		up	up	up	up		no	no	no	no
	M	triosephosphate isomerase (TIM)	TIM	CRYCO0001396	0.0869595	0.135414	-0.451161	-0.511982		126.46	165.177	166.243	121.483	115.373		0.319954	0.128287	2.26415e-08	1.1091e-08		0.502902	0.25711	4.32765e-07	3.22528e-07		up	up	down	down		no	no	no	no
	S	triosephosphate isomerase (TIM)	TIM	CRYCO0001396	0.164274	0.0225117	-0.435686	-0.394428		126.46	166.627	151.84	122.097	124.773		0.0212875	0.781654	3.23952e-08	2.11648e-06		0.0778553	0.880725	6.43235e-07	3.56115e-05		up	up	down	down		no	no	no	no
	G	triosephosphate isomerase (TIM)	TIM	CRYCO0009072	0.173766	0.14018	-0.195567	-0.0457201		415.66	439.477	473.61	376.75	379.413		0.0235149	0.163239	0.0294044	0.582854		0.066356	0.335604	0.124914	0.810974		up	up	down	down		no	no	no	no
	M	triosephosphate isomerase (TIM)	TIM	CRYCO0009072	0.109902	-0.0184034	-0.218801	0.0199793		415.66	435.163	404.447	306.343	396.163		0.176596	0.831112	0.00404396	0.810942		0.334755	0.904174	0.0206009	0.9117		up	down	down	up		no	no	no	no
	S	triosephosphate isomerase (TIM)	TIM	CRYCO0009072	0.116427	-0.0356008	-0.105109	0.0298671		415.66	431.017	385.417	328.673	379.45		0.111816	0.646663	0.175274	0.707903		0.263778	0.793757	0.359017	0.840028		up	down	down	up		no	no	no	no
	G	glyceraldehyde-3-phosphate dehydrogenase (NAD(P))	GAPDH	CRYCO00082518	0.0586639	-0.305641	-0.204079	-0.0109923		27.09	31.7133	24.2	27.32	29.6567		0.500362	0.0128256	0.0346878	0.905193		0.655357	0.051726	0.140994	0.963994		up	down	down	down		no	no	no	no
	M	glyceraldehyde-4-phosphate dehydrogenase (NAD(P))	GAPDH	CRYCO00082518	-0.124165	-0.625604	-1.13777	-1.12983		27.09	27.5467	20.2867	13.6167	13.17		0.207758	1.29286e-10	1.01725e-34	2.81957e-32		0.375043	3.03656e-09	1.84138e-32	5.89351e-30		down	down	down	down		no	no	yes	yes
	S	glyceraldehyde-5-phosphate dehydrogenase (NAD(P))	GAPDH	CRYCO00082518	-0.132792	-0.565368	-0.873199	-0.857353		27.09	27.1633	19.8233	16.6633	15.1533		0.116984	4.25704e-09	3.96892e-20	2.65911e-18		0.272457	1.13302e-07	3.32645e-18	2.15763e-16		down	down	down	down		no	no	no	no
	G	glyceraldehyde 3-phosphate dehydrogenase (phosphorylating)	GAPDH	CRYCO00052484	1.46071	1.87069	1.29862	0.61567		33.12	102.453	137.723	94.2667	54.2567		2.81256e-31	1.36074e-43	2.77021e-18	0.000160893		1.18293e-28	8.14201e-40	3.19755e-16	0.00224731		up	up	up	up		yes	yes	yes	no
	M	glyceraldehyde 3-phosphate dehydrogenase (phosphorylating)	GAPDH	CRYCO00052484	1.18631	1.38513	1.34478	0.967342		33.12	86.1667	102.56	93.8533	64.72		8.52093e-19	7.84073e-19	6.3734e-24	2.50104e-08		1.10168e-16	5.93825e-17	6.072e-22	6.75849e-07		up	up	up	up		yes	yes	yes	no
	S	glyceraldehyde 3-phosphate dehydrogenase (phosphorylating)	GAPDH	CRYCO00052484	1.06168	1.32551	1.31433	0.694234		33.12	79.0567	93.2633	95.5233	53.7667		5.53049e-16	1.15405e-23	1.50685e-24	0.000373234		5.36052e-14	2.03037e-21	1.80002e-22	0.00320618		up	up	up	up		yes	yes	yes	no
	G	glyceraldehyde 3-phosphate dehydrogenase (phosphorylating)	GAPDH	CRYCO00083708	0.586378	0.783663	0.362866	0.362141		698.06	1108.04	1254.07	959.327	893.263		9.23166e-23	1.37565e-19	6.0003e-07	7.42463e-08		1.39824e-20	3.37689e-17	1.3047e-05	2.36453e-06		up	up	up	up		no	no	no	no
	M	glyceraldehyde 3-phosphate dehydrogenase (phosphorylating)	GAPDH	CRYCO00083708	0.593019	0.419069	0.0983496	0.0751258		698.06	1131.26	1000.73	795.353	702.703		8.2066e-17	1.46029e-07	0.156879	0.297042		8.25253e-15	1.9524e-06	0.33837	0.539345		up	up	up	up		no	no	no	no
	S	glyceraldehyde 3-phosphate dehydrogenase (phosphorylating)	GAPDH	CRYCO00083708	0.572466	0.456743	0.14053	0.0109445		698.06	1075.71	994.717	836.273	639.74		2.67512e-24	1.18169e-13	0.0373849	0.862486		7.6872e-22	6.59844e-12	0.119061	0.930245		up	up	up	up		no	no	no	no
	G	glyceraldehyde 3-phosphate dehydrogenase (phosphorylating)	GAPDH	CRYCO00083710	0.583925	0.832822	0.441049	0.508935		1902.18	3319.17	3938.3	3090.77	3034.82		2.02066e-22	5.1562e-22	7.88491e-10	1.06219e-13		2.98934e-20	1.66768e-19	3.00002e-08	8.12659e-12		up	up	up	up		no	no	no	no
	M	glyceraldehyde 3-phosphate dehydrogenase (phosphorylating)	GAPDH	CRYCO00083710	0.514994	0.422145	0.0252662	0.191128		1902.18	3249.49	3029.32	2246.4	2245.15		3.59222e-11	1.03602e-07	0.686902	0.0199067		1.39888e-09	1.42446e-06	0.830488	0.0881458		up	up	up	up		no	no	no	no
	S	glyceraldehyde 3-phosphate dehydrogenase (phosphorylating)	GAPDH	CRYCO00083710	0.533288	0.428905	0.126079	0.171332		1902.18	3189.59	2898.32	2404.38	2105.2		1.8774e-21	2.37108e-12	0.0439548	0.00794154		4.04021e-19	1.08372e-10	0.134627	0.0383283		up	up	up	up		no	no	no	no
	G	phosphoglycerate kinase	PGK	CRYCO00027394	-0.399011	-0.561301	-0.523143	-0.156522		186.473	159.713	139.607	142.53	168.54		0.000492404	0.000327933	0.00264344	0.250062		0.00262507	0.002706	0.0195079	0.535332		down	down	down	down		no	no	no	no
	M	phosphoglycerate kinase	PGK	CRYCO00027394	-0.441987	-0.525078	-0.500937	0.083979		186.473	170.5	152.637	145.79	180.907		0.00061471	5.83313e-06	2.07345e-05	0.45307		0.00382458	5.4889e-05	0.000215934	0.683368		down	down	down	up		no	no	no	no
	S	phosphoglycerate kinase	PGK	CRYCO00027394	-0.460234	-0.559683	-0.488862	0.144733		186.473	166.66	147.903	157.637	181.033		2.97141e-05	0.000133639	6.18299e-05	0.234752		0.000340663	0.00111803	0.000581792	0.437835		down	down	down	up		no	no	no	no
	G	2,3-bisphosphoglycerate-dependent phosphoglycerate mutase	PGAM	CRYCO0008179	0.359158	0.596592	0.245939	0.402163		104.823	165.837	190.143	157.297	163.8		4.6161e-08	1.53966e-11	0.00133122	1.20994e-08		7.12088e-07	9.82671e-10	0.0111424	4.52644e-07		up	up	up	up		no	no	no	no
	M	2,3-bisphosphoglycerate-dependent phosphoglycerate mutase	PGAM	CRYCO0008179	0.290854	0.145369	-0.19305	-0.053241		104.823	149.757	141.057	112.193	124.687		0.000172626	0.0702654	0.00328218	0.449881		0.00129059	0.164103	0.0173476	0.680615		up	up	down	down		no	no	no	no
	S	2,3-bisphosphoglycerate-dependent phosphoglycerate mutase	PGAM	CRYCO0008179	0.31319	0.177987	-0.0807931	-0.0335746		104.823	154.327	137.98	122.407	119.337		2.68015e-07	0.010635	0.231204	0.617986		5.40578e-06	0.0428323	0.431626	0.779938		up	up	down	down		no	no	no	no
	G	enolase	ENO	CRYCO0002145	1.05992	1.10065	0.960071	0.910198		83.3567	195.217	197.14	189.117	171.75		1.14848e-52	6.53881e-32	1.22923e-27	5.77211e-25		2.0874e-49	7.825e-29	3.63472e-25	1.08412e-22		up	up	up	up		yes	yes	no	no
	M	enolase	ENO	CRYCO0002145	0.983005	0.947545	0.508384	0.430885		83.3567	183.52	184.25	130.907	119.353		6.46386e-25	1.11435e-28	1.36371e-11	2.52116e-05		1.82602e-22	2.51662e-26	4.11929e-10	0.000353272		up	up	up	up		no	no	no	no
	S	enolase	ENO	CRYCO0002145	0.989789	0.93415	0.608681	0.358388		83.3567	182.493	173.087	142.767	107.91		1.4801e-47	1.73954e-37	2.11043e-16	3.09753e-05		2.49326e-44	8.67125e-35	1.28661e-14	0.00037779		up	up	up	up		no	no	no	no
	G	enolase	ENO	CRYCO0002146	0.985015	1.0882	0.67254	0.435879		139.73	307.233	307.793	235.24	188.397		1.30859e-58	3.40012e-34	4.05683e-19	5.70698e-08		3.91738e-55	5.42523e-31	5.16835e-17	1.85752e-06		up	up	up	up		no	yes	no	no
	M	enolase	ENO	CRYCO0002146	0.85949	0.837679	0.338661	0.00762306		139.73	262.96	262.9	169.92	128.803		1.90304e-27	1.30283e-24	2.25726e-07	0.916313		7.26604e-25	2.00075e-22	3.62542e-06	0.964872		up	up	up	up		no	no	no	no
	S	enolase	ENO	CRYCO0002146	0.79967	0.745839	0.385196	0.0295435		139.73	248.337	221.79	179.963	122.88		6.34523e-42	3.9912e-30	1.88886e-08	0.667138		6.45772e-39	1.15057e-27	3.90475e-07	0.813695		up	up	up	up		no	no	no	no
	G	pyruvate kinase	PK	CRYCO00056555	0.631154	0.461404	0.177321	-0.170735		103.633	183.923	160.43	137.247	100.49		2.53904e-22	1.22595e-06	0.0234356	0.0201573		3.73452e-20	2.27545e-05	0.106058	0.107004		up	up	up	down		no	no	no	no
	M	pyruvate kinase	PK	CRYCO00056555	0.556713	0.649102	0.532904	0.546931		103.633	171.877	191.17	168.4	161.823		8.37037e-14	2.48877e-18	6.97661e-16	6.19718e-13		5.1521e-12	1.78469e-16	3.44071e-14	3.23131e-11		up	up	up	up		no	no	no	no
	S	pyruvate kinase	PK	CRYCO00056555	0.538656	0.676525	0.669636	0.71929		103.633	168.013	183.023	188.823	173.72		5.89515e-18	1.0181e-23	1.3952e-23	1.56058e-22		7.59852e-16	1.80445e-21	1.52443e-21	1.6644e-20		up	up	up	up		no	no	no	no
	G	pyruvate kinase	PK	CRYCO00075561	0.425793	-0.322154	0.0382181	-0.232596		10.6433	15.9833	9.34333	12.64	9.94333		4.87e-05	0.0373576	0.762524	0.0592251		0.000356752	0.116855	0.898471	0.22433		up	down	up	down		no	no	no	no
	M	pyruvate kinase	PK	CRYCO00075561	0.365143	0.46756	0.429075	0.155045		10.6433	15.0967	16.8867	15.7933	12.5667		0.00259053	1.34744e-05	0.000122376	0.184199		0.0126318	0.00011575	0.00103671	0.40543		up	up	up	up		no	no	no	no
	S	pyruvate kinase	PK	CRYCO00075561	0.252324	0.425634	0.412742	0.187614		10.6433	13.8633	15.4033	15.9133	12.2467		0.0158172	6.61368e-05	0.000252502	0.0991453		0.0623083	0.000610869	0.00195883	0.246797		up	up	up	up		no	no	no	no
	G	pyruvate dehydrogenase E1 component	PDH	CRYCO00063571	0.225724	-0.43641	-0.887549	-1.33044		45.7033	61.43	37.7433	28.9633	19.6		0.00374304	0.000204283	4.24671e-25	1.63212e-58		0.014627	0.00181928	9.87505e-23	1.46661e-55		up	down	down	down		no	no	no	yes
	M	pyruvate dehydrogenase E2 component	PDH	CRYCO00063571	0.252602	0.0700342	-0.562581	-0.83743		45.7033	61.6967	56.2833	34.8833	26.4167		0.00083604	0.375152	3.00162e-13	1.97702e-22		0.0049538	0.549764	1.11815e-11	2.35403e-20		up	up	down	down		no	no	no	no
	S	pyruvate dehydrogenase E3 component	PDH	CRYCO00063571	0.0666026	0.0682669	-0.424729	-0.875997		45.7033	53.39	53.0867	38.3167	24.2167		0.333619	0.360876	1.29256e-07	1.78345e-26		0.542296	0.561752	2.27503e-06	2.46789e-24		up	up	down	down		no	no	no	no

## Sheet: TCA
					Log2fc					TPM						pvalue					padjust					regulate					significant
Pathway	Group	Gene name	Abbreviation	gene_id	6h	12h	24h	48h		0h	6h	12h	24h	48h		6h	12h	24h	48h		6h	12h	24h	48h		6h	12h	24h	48h		6h	12h	24h	48h
TCA cycle
	G	citrate synthase	CS	CRYCO00035558	-0.453745	-0.729538	-1.22702	-1.2794		1629.9	1238.6	967.59	594.98	480.347		3.52234e-13	1.63861e-16	1.92813e-57	1.21021e-62		1.43519e-11	2.62331e-14	2.9794e-54	1.32051e-59		down	down	down	down		no	no	yes	yes
	M	citrate synthase	CS	CRYCO00035558	-0.653219	-1.03455	-1.88408	-2.69312		1629.9	1087.88	781.683	312.967	176.51		1.05322e-15	7.37567e-41	7.83807e-207	0		8.93631e-14	4.28046e-38	9.57694e-203	0		down	down	down	down		no	yes	yes	yes
	S	citrate synthase	CS	CRYCO00035558	-0.532442	-1.00759	-1.8168	-2.66496		1629.9	1175.43	784.833	381.66	182.493		5.24681e-20	1.16007e-54	9.59559e-165	0		9.32044e-18	1.4609e-51	1.53072e-160	0		down	down	down	down		no	yes	yes	yes
	G	citrate synthase	CS	CRYCO00038565	-0.387257	-0.26305	-0.110747	0.270588		19.6733	16.5233	19.64	21.8567	27.14		0.00135143	0.070765	0.375082	0.0208997		0.00618822	0.186387	0.639196	0.109775		down	down	down	up		no	no	no	no
	M	citrate synthase	CS	CRYCO00038565	-0.392142	-0.299785	0.00261074	0.163418		19.6733	16.3567	17.88	22.57	24.2033		0.00220043	0.0120614	0.981418	0.168368		0.0110387	0.0404372	0.991542	0.383598		down	down	up	up		no	no	no	no
	S	citrate synthase	CS	CRYCO00038565	-0.207137	-0.334665	-0.111771	0.183786		19.6733	18.7933	17.1067	21.78	24.3567		0.0707342	0.00524889	0.341988	0.103852		0.190634	0.0243841	0.554223	0.25488		down	down	down	up		no	no	no	no
	G	aconitate hydratase	AHD	CRYCO00020744	-0.534698	-0.682908	-0.296594	-0.109758		151.723	116.41	102.133	136.263	137.133		1.53946e-16	3.3019e-14	0.000174932	0.198522		1.05586e-14	3.58402e-12	0.00201239	0.471487		down	down	down	down		no	no	no	no
	M	aconitate hydratase	AHD	CRYCO00020744	0.0462337	0.0296979	0.206624	0.230629		151.723	163.813	178.92	179.473	179.103		0.533124	0.704143	0.000851613	0.00187455		0.696392	0.820203	0.00558681	0.0138446		up	up	up	up		no	no	no	no
	S	aconitate hydratase	AHD	CRYCO00020744	0.0580152	0.158981	0.295962	0.285301		151.723	149.227	177.733	191.43	178.387		0.331891	0.0182908	1.2721e-05	2.33103e-05		0.540477	0.0656531	0.000144502	0.000293691		up	up	up	up		no	no	no	no
	G	aconitate hydratase 2 / 2-methylisocitrate dehydratase	AHD	CRYCO00048413	0.0311397	-0.267044	-0.290801	-0.268917		243.63	268.16	218.73	218.89	208.773		0.607261	0.0078503	0.000493368	0.000306247		0.741786	0.035404	0.00483892	0.0038942		up	down	down	down		no	no	no	no
	M	aconitate hydratase 2 / 3-methylisocitrate dehydratase	AHD	CRYCO00048414	-0.231462	-0.447071	-0.492503	-0.352284		244.63	218.68	191.103	171.927	179.527		0.000808449	2.31304e-07	2.44321e-13	1.39347e-06		0.00481483	2.96086e-06	9.21368e-12	2.64577e-05		down	down	down	down		no	no	no	no
	S	aconitate hydratase 2 / 4-methylisocitrate dehydratase	AHD	CRYCO00048415	-0.152004	-0.297634	-0.357548	-0.298875		245.63	232.32	203.273	198.157	185.407		0.0109218	3.3439e-06	8.69968e-08	5.83801e-06		0.0465529	4.49114e-05	1.58365e-06	8.79338e-05		down	down	down	down		no	no	no	no
	G	isocitrate dehydrogenase	ICDH	CRYCO00010593	-0.184359	-0.287809	-0.47225	-0.354723		71.2333	71.3667	65.0833	60.0533	61.1667		7.06511e-06	0.0487074	0.000185976	0.0044457		0.183234	0.142479	0.00212262	0.0345611		down	down	down	down		no	no	no	no
	M	isocitrate dehydrogenase	ICDH	CRYCO00010593	-0.58514	-1.12172	-1.97616	-2.05886		71.2333	53.0967	38.3033	20.1267	18.2233		6.25104e-07	6.15384e-23	1.01383e-67	2.11974e-63		9.79169e-06	7.71703e-21	6.60668e-65	1.51438e-60		down	down	down	down		no	yes	yes	yes
	S	isocitrate dehydrogenase	ICDH	CRYCO00010593	-0.452747	-0.902274	-1.5987	-2.05353		71.2333	57.9733	41.7733	26.53	17.4267		1.80395e-05	5.66276e-16	2.71029e-45	2.0644e-58		0.00021992	4.32885e-14	1.02131e-42	1.05041e-55		down	down	down	down		no	no	yes	yes
	G	Isocitrate dehydrogenase	ICDH	CRYCO00010591	-0.14743	-0.179105	-0.364123	-0.255867		141.423	139.433	133.36	119.867	121.21		0.0335498	0.0733507	1.56739e-05	0.000812804		0.0882779	0.191203	0.000243216	0.00878311		down	down	down	down		no	no	no	no
	M	Isocitrate dehydrogenase	ICDH	CRYCO00010591	-0.400325	-0.693146	-1.61052	-2.18118		141.423	116.907	100.29	53.5167	32.45		1.72894e-06	1.34415e-16	7.04922e-119	1.49321e-128		2.37953e-05	7.72889e-15	1.72262e-115	4.20434e-125		down	down	down	down		no	no	yes	yes
	S	Isocitrate dehydrogenase	ICDH	CRYCO00010591	-0.352262	-0.674797	-1.3334	-2.02581		141.423	119.853	94.8767	63.4867	35.6167		6.20509e-08	5.37094e-19	5.9656e-78	4.91361e-167		1.46508e-06	5.71158e-17	7.1374e-75	2.40015e-163		down	down	down	down		no	no	yes	yes
	G	Isocitrate dehydrogenase	ICDH	CRYCO00059065	0.295827	0.18982	-0.110025	-0.100286		18.5567	21.4933	20.36	14.3033	12.3933		0.0709853	0.334052	0.551752	0.577199		0.158911	0.54027	0.779338	0.807381		up	up	down	down		no	no	no	no
	M	Isocitrate dehydrogenase	ICDH	CRYCO00059065	-0.0180817	0.232055	0.335607	0.0802587		18.5567	13.49	19.7433	18.7567	18.9267		0.918853	0.177651	0.0451069	0.654027		0.95744	0.326072	0.139167	0.823243		down	up	up	up		no	no	no	no
	S	Isocitrate dehydrogenase	ICDH	CRYCO00059065	0.116659	0.341671	0.364687	0.056134		18.5567	18.15	17.78	25.41	19.0733		0.483486	0.0418644	0.0316574	0.756436		0.677241	0.124348	0.105137	0.869341		up	up	up	up		no	no	no	no
	G	isocitrate dehydrogenase (NAD+)	ICDH	CRYCO00032441	0.288801	0.445414	-0.178775	-0.354053		16.6467	23.45	26.5533	16.8267	13.01		0.250296	0.0987361	0.51104	0.199299		0.405237	0.236244	0.750825	0.472621		up	up	down	down		no	no	no	no
	M	isocitrate dehydrogenase (NAD+)	ICDH	CRYCO00032441	0.0980915	-0.12621	-0.262905	0.227163		16.6467	20.9833	18.4867	15.7633	17.6433		0.738812	0.635888	0.330248	0.382239		0.847408	0.770413	0.548084	0.623403		up	down	down	up		no	no	no	no
	S	isocitrate dehydrogenase (NAD+)	ICDH	CRYCO00032441	0.0237802	-0.0737448	-0.0989257	-0.010449		16.6467	20	19.2	18.05	15.7767		0.933465	0.787136	0.708031	0.968929		0.967449	0.883785	0.842849	0.985534		up	down	down	down		no	no	no	no
	G	2-oxoglutarate dehydrogenase E2 component (dihydrolipoamide succinyltransferase)	DLST	CRYCO00010601	-0.042211	-0.0687034	-0.360839	-0.183468		58.7	67.4433	63.61	53.54	56.23		0.553453	0.487709	1.38064e-05	0.0194127		0.699718	0.67891	0.000216766	0.104186		down	down	down	down		no	no	no	no
	M	2-oxoglutarate dehydrogenase E2 component (dihydrolipoamide succinyltransferase)	DLST	CRYCO00010601	-0.337446	-0.544412	-1.07358	-1.16086		58.7	54.2	48.2733	32.2133	27.5867		4.17646e-05	4.20307e-11	7.63667e-47	3.61889e-46		0.000384682	1.08411e-09	2.59191e-44	1.41985e-43		down	down	down	down		no	no	yes	yes
	S	2-oxoglutarate dehydrogenase E2 component (dihydrolipoamide succinyltransferase)	DLST	CRYCO00010601	-0.33898	-0.607978	-0.913038	-1.06947		58.7	53.0733	44.2133	35.8567	28.5467		1.21989e-06	1.89639e-14	2.61833e-33	3.8216e-43		2.1065e-05	1.19251e-12	5.42448e-31	1.07904e-40		down	down	down	down		no	no	no	yes
	G	2-oxoglutarate dehydrogenase E1 component	OGDH	CRYCO00010377	0.646568	0.356924	0.119924	0.0403038		32.5467	57.3233	46.0733	41.07	36.7333		1.48159e-13	0.00623002	0.248411	0.678058		6.4499e-12	0.0295091	0.509282	0.861984		up	up	up	up		no	no	no	no
	M	2-oxoglutarate dehydrogenase E1 component	OGDH	CRYCO00010377	-0.340928	-0.755771	-1.44853	-1.58794		32.5467	28.6633	22.2733	13.21	11.3933		0.00125393	3.78859e-13	3.25692e-46	2.76085e-41		0.00695044	1.34296e-11	1.05416e-43	8.81006e-39		down	down	down	down		no	no	yes	yes
	S	2-oxoglutarate dehydrogenase E1 component	OGDH	CRYCO00010377	-0.191141	-0.862056	-1.35038	-1.63539		32.5467	31.49	19.5033	14.3933	10.57		0.0490231	1.27067e-15	4.03557e-39	5.54183e-52		0.145959	9.24718e-14	1.1036e-36	2.25585e-49		down	down	down	down		no	no	yes	yes
	G	2-oxoglutarate dehydrogenase	DLST;OGDH	CRYCO00070238	0.47787	0.280296	0.00504014	0.0728812		9.35	15.43	13.8333	11.6033	10.5		0.000400233	0.0609186	0.971936	0.59788		0.0021996	0.167387	0.988473	0.819778		up	up	up	up		no	no	no	no
	M	2-oxoglutarate dehydrogenase	DLST;OGDH	CRYCO00070238	0.310969	0.160342	0.163106	0.0381171		9.35	14.1467	14.39	11.73	10.31		0.0205055	0.248235	0.209433	0.803145		0.0663072	0.413587	0.411309	0.907532		up	up	up	up		no	no	no	no
	S	2-oxoglutarate dehydrogenase	DLST;OGDH	CRYCO00070238	0.48161	0.0392687	0.184472	0.141447		9.35	14.2033	10.5933	12.4433	10.4433		0.000112257	0.774911	0.166592	0.326083		0.00106256	0.876325	0.346755	0.537306		up	up	up	up		no	no	no	no
	G	succinyl-CoA synthetase alpha subunit	SCH	CRYCO00062100	0.52858	0.257904	-0.0897271	-0.0201476		80.7833	130.44	106.013	87.6533	87.2133		2.42809e-09	0.0173774	0.393369	0.877982		4.91323e-08	0.0654873	0.656534	0.952368		up	up	down	down		no	no	no	no
	M	succinyl-CoA synthetase alpha subunit	SCH	CRYCO00062100	0.618944	0.619319	0.576948	0.570489		80.7833	137.813	142.44	132.853	125.663		9.88195e-12	4.02046e-11	5.37522e-11	2.61855e-08		4.27012e-10	1.0424e-09	1.50377e-09	7.0574e-07		up	up	up	up		no	no	no	no
	S	succinyl-CoA synthetase alpha subunit	SCH	CRYCO00062100	0.538216	0.703056	0.656814	0.568516		80.7833	128.963	142.737	142.73	120.297		2.86203e-10	1.66018e-15	1.05546e-12	1.72724e-08		1.10176e-08	1.18577e-13	4.14707e-11	4.52631e-07		up	up	up	up		no	no	no	no
	G	succinyl-CoA synthetase beta subunit	SCH	CRYCO00069568	0.219301	0.826248	0.302891	0.270788		71.83	96.67	140.933	96.93	85.79		0.259724	0.00289919	0.182104	0.312111		0.416125	0.0160753	0.423814	0.601578		up	up	up	up		no	no	no	no
	M	succinyl-CoA synthetase beta subunit	SCH	CRYCO00069568	0.294601	-0.397896	-1.47791	-0.790034		71.83	109.34	63.7533	29.3133	36.58		0.170601	0.0876021	2.71353e-09	0.000519913		0.326741	0.194356	6.00911e-08	0.00483059		up	down	down	down		no	no	yes	no
	S	succinyl-CoA synthetase beta subunit	SCH	CRYCO00069568	-0.0937391	-1.0525	-1.60852	-0.934292		71.83	81.3267	42.4867	26.4767	34.13		0.640915	6.1033e-05	3.57961e-11	0.000127646		0.793457	0.000569332	1.16458e-09	0.00128931		down	down	down	down		no	yes	yes	no
	G	succinate dehydrogenase (ubiquinone) flavoprotein subunit	SDH	CRYCO00015581	0.142465	-0.0228021	-0.941397	-1.36919		42.3133	52.9567	45.9367	24.7733	16.88		0.453511	0.908279	7.49408e-06	2.90425e-10		0.613983	0.954543	0.000126135	1.43268e-08		up	down	down	down		no	no	no	yes
	M	succinate dehydrogenase (ubiquinone) flavoprotein subunit	SDH	CRYCO00015581	0.467155	0.658829	0.863266	1.03464		42.3133	68.23	77.3167	85.9233	80.9833		0.0298441	0.00030738	1.80526e-07	2.27717e-10		0.0888867	0.00179599	2.9548e-06	8.71295e-09		up	up	up	up		no	no	no	yes
	S	succinate dehydrogenase (ubiquinone) flavoprotein subunit	SDH	CRYCO00015581	0.496909	0.942129	1.00445	0.94987		42.3133	69.0633	95.9933	95.89	76.4733		0.00257939	3.04435e-09	4.16842e-10	8.59085e-09		0.0145654	8.30109e-08	1.16116e-08	2.36149e-07		up	up	up	up		no	no	yes	no
	G	succinate dehydrogenase (ubiquinone) flavoprotein subunit	SDH	CRYCO00079421	-0.0947469	-0.347968	-0.673147	-0.515182		303.96	319.067	248.267	215.513	228.03		0.136192	5.63684e-05	2.35369e-17	6.99684e-10		0.259461	0.000618307	2.45101e-15	3.24875e-08		down	down	down	down		no	no	no	no
	M	succinate dehydrogenase (ubiquinone) flavoprotein subunit	SDH	CRYCO00079421	-0.0563908	-0.155902	-0.123899	0.00433121		303.96	340.247	308.99	321.61	330.007		0.433589	0.0649572	0.0500421	0.951405		0.61212	0.154861	0.150145	0.980528		down	down	down	up		no	no	no	no
	S	succinate dehydrogenase (ubiquinone) flavoprotein subunit	SDH	CRYCO00079421	-0.00193794	-0.0158674	0.0126492	0.0846027		303.96	322.19	317.543	366.033	322.387		0.973138	0.808602	0.850514	0.186419		0.986895	0.897076	0.926225	0.376915		down	down	up	up		no	no	no	no
	G	succinate dehydrogenase (ubiquinone) iron-sulfur subunit	SDH	CRYCO00020593	-0.0266107	-0.309432	-1.08398	-1.10969		29.8467	33.0067	26.61	16.32	15.1167		0.796463	0.0148621	1.26927e-18	2.5942e-18		0.877982	0.0579946	1.51622e-16	3.02512e-16		down	down	down	down		no	no	yes	yes
	M	succinate dehydrogenase (ubiquinone) iron-sulfur subunit	SDH	CRYCO00020593	0.361645	0.55135	0.849653	1.2537		29.8467	42.9933	50.4067	59.5767	74.3967		0.00151845	4.2905e-05	5.77279e-19	1.83174e-38		0.00813972	0.000318754	3.732e-17	4.89821e-36		up	up	up	up		no	no	no	yes
	S	succinate dehydrogenase (ubiquinone) iron-sulfur subunit	SDH	CRYCO00020593	0.43839	0.809337	0.965655	1.37214		29.8467	44.79	57.2567	65.74	77.5133		1.84011e-05	5.69691e-17	1.11525e-24	1.04195e-49		0.000223777	4.88566e-15	1.3512e-22	4.03938e-47		up	up	up	up		no	no	no	yes
	G	succinate dehydrogenase (ubiquinone) iron-sulfur subunit	SDH	CRYCO00073936	0.708296	0.812446	0.0614431	-0.0647392		60.71	114.127	122.033	75.6967	63.5367		1.10355e-20	2.13742e-16	0.548263	0.47107		1.34356e-18	3.36559e-14	0.776963	0.735222		up	up	up	down		no	no	no	no
	M	succinate dehydrogenase (ubiquinone) iron-sulfur subunit	SDH	CRYCO00073936	0.685856	1.06435	1.28345	1.04451		60.71	111.643	150.477	167.043	128.4		6.96007e-16	1.67527e-22	1.91043e-72	8.47324e-41		6.04179e-14	1.93997e-20	1.53066e-69	2.58331e-38		up	up	up	up		no	yes	yes	yes
	S	succinate dehydrogenase (ubiquinone) iron-sulfur subunit	SDH	CRYCO00073936	0.643528	1.04528	1.18402	1.01462		60.71	107.69	140.537	158.303	120.397		3.77155e-18	2.5904e-45	4.22232e-56	1.09802e-41		5.06164e-16	1.93689e-42	2.52584e-53	2.91494e-39		up	up	up	up		no	yes	yes	yes
	G	fumarate hydratase, class I	FHD	CRYCO00059801	0.0407165	-0.101277	-0.137546	-0.111841		168.62	189.017	155.173	170.617	195.137		0.559247	0.417639	0.124399	0.163219		0.704079	0.620335	0.335301	0.422383		up	down	down	down		no	no	no	no
	M	fumarate hydratase, class I	FHD	CRYCO00059801	-0.309928	-0.376917	-0.438694	-0.500526		168.62	152.177	142.987	147.3	144.913		0.000381746	8.26529e-05	8.67906e-10	3.44087e-10		0.00255396	0.000570252	2.0783e-08	1.28472e-08		down	down	down	down		no	no	no	no
	S	fumarate hydratase, class I	FHD	CRYCO00059801	-0.309764	-0.298106	-0.246517	-0.56135		168.62	147.17	122.023	172.893	142.587		5.58999e-06	3.6796e-05	0.000580398	1.05939e-12		8.01282e-05	0.000367224	0.00400809	5.05845e-11		down	down	down	down		no	no	no	no
	G	malate dehydrogenase (quinone)	MDH	CRYCO00069124	-0.158509	-0.0705896	-0.427819	-0.492968		134.32	135.637	141.807	115.65	104.373		0.0587074	0.510913	1.38249e-05	2.17938e-07		0.137093	0.697607	0.000216985	6.38597e-06		down	down	down	down		no	no	no	no
	M	malate dehydrogenase (quinone)	MDH	CRYCO00069124	-0.324956	-0.4612	-0.699441	-0.675023		134.32	119.533	112.8	91.49	88.52		0.000215132	2.90426e-07	1.58011e-16	6.059e-14		0.00156317	3.62742e-06	8.37596e-15	3.53683e-12		down	down	down	down		no	no	no	no
	S	malate dehydrogenase (quinone)	MDH	CRYCO00069124	-0.316267	-0.356977	-0.534012	-0.584248		134.32	118.97	114.55	104.683	90.0733		9.65744e-05	2.59e-05	3.30405e-10	9.39326e-11		0.0009331	0.000270793	9.37852e-09	3.55134e-09		down	down	down	down		no	no	no	no
	G	malate dehydrogenase (quinone)	MDH	CRYCO00069128	0.194874	0.158576	0.0775217	0.223546		120.673	155.89	149.8	148.283	153.883		0.00367803	0.0914353	0.3471	0.00275278		0.014415	0.223848	0.614034	0.0236289		up	up	up	up		no	no	no	no
	M	malate dehydrogenase (quinone)	MDH	CRYCO00069128	-0.263588	-0.437422	-1.30723	-1.85233		120.673	112.947	103.06	53.99	35.0667		0.000500453	9.16229e-06	1.11626e-64	8.17682e-118		0.00321902	8.23056e-05	6.6532e-62	1.7017e-114		down	down	down	down		no	no	yes	yes
	S	malate dehydrogenase (quinone)	MDH	CRYCO00069128	-0.315612	-0.769546	-1.27157	-1.86826		120.673	106.877	76.74	56.3667	32.9467		1.95872e-06	4.80461e-25	1.05066e-56	9.85929e-129		3.18632e-05	9.54023e-23	6.53007e-54	2.18908e-125		down	down	down	down		no	no	yes	yes
	G	malate dehydrogenase	MDH	CRYCO00015902	-0.203173	-0.151187	-0.631119	-0.793713		407.793	395.36	433.96	308.023	256.25		0.00184048	0.0925129	8.43728e-17	2.34562e-27		0.00802055	0.225686	8.3161e-15	5.16803e-25		down	down	down	down		no	no	no	no
	M	malate dehydrogenase	MDH	CRYCO00015902	-0.316915	-0.410464	-0.631737	-0.396963		407.793	379.06	362.327	286.477	330.473		5.96543e-06	1.95409e-09	3.58088e-20	1.51258e-08		7.03869e-05	3.75688e-08	2.59277e-18	4.27147e-07		down	down	down	down		no	no	no	no
	S	malate dehydrogenase	MDH	CRYCO00015902	-0.317757	-0.333038	-0.531732	-0.393194		407.793	352.27	346.807	303.127	308.267		2.14372e-07	2.82532e-07	3.40978e-16	1.78039e-09		4.44305e-06	4.94524e-06	2.02459e-14	5.53225e-08		down	down	down	down		no	no	no	no
	G	malate dehydrogenase	MDH	CRYCO00021150	0.0590025	-0.10766	-0.925133	-0.903917		113.583	126.077	102.167	51.1233	57.3733		0.587414	0.39743	5.21907e-10	4.13034e-10		0.726466	0.602031	2.04252e-08	1.99038e-08		up	down	down	down		no	no	no	no
	M	malate dehydrogenase	MDH	CRYCO00021150	0.0538045	0.345221	0.528327	0.445159		113.583	105.967	140.22	164.813	145.843		0.630322	0.00214432	5.28882e-07	0.000597935		0.771806	0.00959762	7.86149e-06	0.00544328		up	up	up	up		no	no	no	no
	S	malate dehydrogenase	MDH	CRYCO00021150	-0.0553993	0.386031	0.552885	0.399533		113.583	114.733	154.12	159.46	146.083		0.6044	0.0003384	2.16422e-07	0.000467204		0.768934	0.00248273	3.6227e-06	0.00387002		down	up	up	up		no	no	no	no
	G	malate dehydrogenase	MDH	CRYCO00059682	0.0127167	0.257076	0.414469	0.561757		41.8633	48.31	55.8467	64.38	62.89		0.960595	0.314559	0.0995874	0.0214763		0.978487	0.519557	0.290286	0.11183		up	up	up	up		no	no	no	no
	M	malate dehydrogenase	MDH	CRYCO00059682	-0.813613	-1.00718	-0.499694	0.0524176		41.8633	29.8433	24.2033	33.4467	39.5067		0.00258892	0.00192136	0.0484404	0.83991		0.012626	0.00872966	0.146575	0.927643		down	down	down	up		no	yes	no	no
	S	malate dehydrogenase	MDH	CRYCO00059682	-0.489644	-1.04847	-0.490371	-0.465253		41.8633	35.2167	25.6133	33.8633	28.2233		0.05611	0.00044587	0.0740408	0.0975975		0.160944	0.00314283	0.196145	0.24396		down	down	down	down		no	yes	no	no
	G	pyruvate dehydrogenase E1 component	PDH	CRYCO00063571	0.225724	-0.43641	-0.887549	-1.33044		45.7033	61.43	37.7433	28.9633	19.6		0.00374304	0.000204283	4.24671e-25	1.63212e-58		0.014627	0.00181928	9.87505e-23	1.46661e-55		up	down	down	down		no	no	no	yes
	M	pyruvate dehydrogenase E1 component	PDH	CRYCO00063571	0.252602	0.0700342	-0.562581	-0.83743		45.7033	61.6967	56.2833	34.8833	26.4167		0.00083604	0.375152	3.00162e-13	1.97702e-22		0.0049538	0.549764	1.11815e-11	2.35403e-20		up	up	down	down		no	no	no	no
	S	pyruvate dehydrogenase E1 component	PDH	CRYCO00063571	0.0666026	0.0682669	-0.424729	-0.875997		45.7033	53.39	53.0867	38.3167	24.2167		0.333619	0.360876	1.29256e-07	1.78345e-26		0.542296	0.561752	2.27503e-06	2.46789e-24		up	up	down	down		no	no	no	no
	G	pyruvate carboxylase	PC	CRYCO00053495	-0.285237	-0.50533	-0.320978	-0.560109		34.54	31.6367	26.5933	31.82	25.5767		0.0288737	0.00232854	0.0288892	0.000840206		0.0784439	0.0134422	0.123195	0.00902813		down	down	down	down		no	no	no	no
	M	pyruvate carboxylase	PC	CRYCO00053495	-0.258163	-0.465643	-0.454869	-0.461352		34.54	32.02	28.6967	27.7133	26.22		0.0565308	0.000777913	0.000511836	0.00217678		0.145028	0.00403593	0.00363069	0.0156376		down	down	down	down		no	no	no	no
	S	pyruvate carboxylase	PC	CRYCO00053495	-0.294208	-0.328043	-0.391065	-0.443662		34.54	30.8833	29.7967	29.5033	25.4233		0.0215807	0.0128872	0.00377729	0.00209181		0.0785865	0.0498636	0.0191717	0.0132683		down	down	down	down		no	no	no	no
	G	ATP citrate (pro-S)-lyase	ACLY	CRYCO00083155	0.000890823	-0.157468	-0.11507	-0.405968		175.16	169.167	137.283	163.473	152.82		0.990234	0.101896	0.203006	1.50458e-05		0.99475	0.241391	0.452045	0.000283519		up	down	down	down		no	no	no	no
	M	ATP citrate (pro-S)-lyase	ACLY	CRYCO00083155	-0.112748	-0.0897128	-0.199467	-0.339429		175.16	158.65	161.753	155.39	158.187		0.147109	0.272204	0.00774696	0.000159876		0.293593	0.441297	0.0350784	0.00177062		down	down	down	down		no	no	no	no
	S	ATP citrate (pro-S)-lyase	ACLY	CRYCO00083155	-0.171346	-0.0521489	-0.248222	-0.358052		175.16	155.743	169.093	153.187	167.217		0.0188182	0.508889	0.00138255	7.85995e-06		0.0710313	0.690867	0.00838698	0.0001143		down	down	down	down		no	no	no	no
	G	phosphoenolpyruvate carboxykinase (ATP)	E4.1.1.49, pckA	CRYCO00042473	0.380013	0.183224	-0.2222	-0.836492		57.1233	87.4067	72.9767	57.1967	35.1067		5.77394e-05	0.165116	0.0505184	4.90282e-11		0.000414095	0.338187	0.18362	2.66216e-09		up	up	down	down		no	no	no	no
	M	phosphoenolpyruvate carboxykinase (ATP)	E4.1.1.49, pckA	CRYCO00042473	0.175847	0.0463593	-0.474354	-1.12128		57.1233	77.3233	70.91	48.3467	27.6167		0.0757577	0.656424	3.45756e-06	2.77644e-22		0.180589	0.785813	4.32628e-05	3.28141e-20		up	up	down	down		no	no	no	yes
	S	phosphoenolpyruvate carboxykinase (ATP)	E4.1.1.49, pckA	CRYCO00042473	0.0232635	-0.10187	-0.511122	-1.16385		57.1233	68.5367	62.4267	47.5933	25.6133		0.803163	0.303616	9.2422e-07	1.32343e-23		0.896382	0.503282	1.36094e-05	1.4999e-21		up	up	down	down		no	no	no	yes
	G	phosphoenolpyruvate carboxykinase (ATP)	E4.1.1.49, pckA	CRYCO00042472	0.195696	0.0476267	-0.415268	-0.7004		80.68	91.87	79.1133	62.03	44.0733		0.0257383	0.689681	0.000234847	1.74607e-12		0.0714318	0.82563	0.00258182	1.17502e-10		up	up	down	down		no	no	no	no
	M	phosphoenolpyruvate carboxykinase (ATP)	E4.1.1.49, pckA	CRYCO00042472	-0.0465905	-0.0397002	-0.675994	-1.03645		80.68	81.6867	80.5167	49.7867	45.15		0.612396	0.665195	1.80097e-13	2.27511e-25		0.758311	0.792474	6.9036e-12	3.36113e-23		down	down	down	down		no	no	no	yes
	S	phosphoenolpyruvate carboxykinase (ATP)	E4.1.1.49, pckA	CRYCO00042472	-0.0724632	-0.183962	-0.751499	-1.00759		80.68	77.33	76.0833	45.5633	32.2267		0.402658	0.0459583	1.61581e-15	5.69097e-27		0.608327	0.133379	8.94997e-14	8.0343e-25		down	down	down	down		no	no	no	yes
	G	phosphoenolpyruvate carboxykinase (ATP)	E4.1.1.49, pckA	CRYCO00039438	-0.120349	-0.258016	-0.390011	-0.274243		145.003	149.143	133.087	128.073	131.947		0.052513	0.00395584	2.30502e-07	0.00221688		0.125857	0.020661	5.52352e-06	0.0198864		down	down	down	down		no	no	no	no
	M	phosphoenolpyruvate carboxykinase (ATP)	E4.1.1.49, pckA	CRYCO00039438	-0.346404	-0.791878	-1.51918	-1.39663		145.003	125.7	96.1567	55.6467	58.38		2.7145e-06	2.45736e-26	1.75404e-120	8.71891e-82		3.52639e-05	4.52571e-24	4.51195e-117	1.12794e-78		down	down	down	down		no	no	yes	yes
	S	phosphoenolpyruvate carboxykinase (ATP)	E4.1.1.49, pckA	CRYCO00039438	-0.324313	-0.76835	-1.35969	-1.27263		145.003	126.63	91.7967	63.3067	60.6933		6.74518e-08	4.68316e-30	6.24814e-91	7.26787e-75		1.58114e-06	1.32608e-27	1.10747e-87	6.12092e-72		down	down	down	down		no	no	yes	yes

## Sheet: Pentose phosphate
					Log2fc					TPM						pvalue					padjust					regulate					significant
Pathway	Group	Gene name	Abbreviation	gene_id	6h	12h	24h	48h		0h	6h	12h	24h	48h		6h	12h	24h	48h		6h	12h	24h	48h		6h	12h	24h	48h		6h	12h	24h	48h
Pentose phosphate
	G	glucose-6-phosphate 1-dehydrogenase	G6PD	CRYCO00012871	0.278639	0.595113	0.532176	0.343053		11.2633	16.72	18.2567	16.7733	13.7033		0.00945982	9.44132e-07	3.61597e-06	0.00352544		0.0315079	1.81428e-05	6.55115e-05	0.0288181		up	up	up	up		no	no	no	no
	M	glucose-6-phosphate 1-dehydrogenase	G6PD	CRYCO00012871	0.247943	0.408953	0.556416	0.552106		11.2633	15.93	16.84	16.2333	15.2433		0.0251934	0.000116213	4.03223e-08	5.31667e-06		0.0778289	0.000770181	7.42423e-07	8.91688e-05		up	up	up	up		no	no	no	no
	S	glucose-6-phosphate 1-dehydrogenase	G6PD	CRYCO00012871	0.0827928	0.233507	0.514167	0.498212		11.2633	13.8467	14.3133	16.93	14.0967		0.439569	0.0311485	1.29095e-06	2.37787e-06		0.640388	0.099167	1.84201e-05	3.94136e-05		up	up	up	up		no	no	no	no
	G	6-phosphogluconolactonase	PGL	CRYCO00079917	-0.082473	0.107639	-0.11235	-0.23571		37.0167	40.1167	45.2167	40.55	35.08		0.340591	0.316927	0.266761	0.0149892		0.503925	0.522272	0.529775	0.086373		down	up	down	down		no	no	no	no
	M	6-phosphogluconolactonase	PGL	CRYCO00079917	-0.125617	-0.0846829	-0.0200809	0.0779272		37.0167	38.5133	41.75	41.81	41.9233		0.164122	0.35765	0.816448	0.404754		0.317826	0.532435	0.907837	0.642798		down	down	down	up		no	no	no	no
	S	6-phosphogluconolactonase	PGL	CRYCO00079917	-0.146001	-0.0633612	-0.0332821	0.0963533		37.0167	37.3933	39.2267	40.9567	39.74		0.0967607	0.493439	0.709078	0.308101		0.238057	0.678108	0.843404	0.51872		down	down	down	up		no	no	no	no
	G	6-phosphogluconate dehydrogenase	PGD	CRYCO00071754	-0.197941	-0.0258176	-0.066885	0.190099		15.4567	16.7467	18.9267	18.52	19.56		0.217776	0.884998	0.698653	0.294602		0.366727	0.942218	0.867264	0.584106		down	down	down	up		no	no	no	no
	M	6-phosphogluconate dehydrogenase	PGD	CRYCO00071754	-0.224589	-0.262888	-0.0130772	0.230115		15.4567	16.96	17.2267	19.1167	18.9067		0.169057	0.131426	0.9324	0.146261		0.324747	0.261417	0.968409	0.350818		down	down	down	up		no	no	no	no
	S	6-phosphogluconate dehydrogenase	PGD	CRYCO00071754	-0.133402	-0.260481	-0.174504	0.417509		15.4567	17.3133	16.0833	17.3633	20.8067		0.408632	0.133877	0.344099	0.0100545		0.613804	0.289052	0.556251	0.0461285		down	down	down	up		no	no	no	no
	G	ribose 5-phosphate isomerase	RPEase	CRYCO0006193	-0.59865	-0.964163	-1.07998	-0.906089		60.8333	45.22	36.14	30.4467	33.07		0.000493986	2.14242e-06	3.23545e-06	3.79e-06		0.00263102	3.70777e-05	5.92675e-05	8.39e-05		down	down	down	down		no	no	yes	no
	M	ribose 5-phosphate isomerase	RPEase	CRYCO0006193	-0.473214	-0.717153	-1.08492	-0.516662		60.8333	53.9667	42.0033	33.23	36.6833		0.00968281	4.84311e-05	8.79869e-10	0.00382038		0.0365255	0.000355522	2.10591e-08	0.0246417		down	down	down	down		no	no	yes	no
	S	ribose 5-phosphate isomerase	RPEase	CRYCO0006193	-0.469465	-0.832965	-0.871255	-0.476244		60.8333	52.0333	41.1867	37.9067	41.2567		0.00619489	9.92517e-06	8.90181e-07	0.00831788		0.0295332	0.000117216	1.31648e-05	0.0397791		down	down	down	down		no	no	no	no
	G	transketolase	TKT	CRYCO00079450	0.228285	0.339942	0.26293	-0.303136		29.7567	37.6367	43.3733	39.4	20.97		0.506864	0.354811	0.468305	0.420532		0.660711	0.561124	0.717916	0.697584		up	up	up	down		no	no	no	no
	M	transketolase	TKT	CRYCO00079450	-0.412051	-0.481093	-0.460531	-0.118676		29.7567	26.2467	25.35	23.9967	22.03		0.296165	0.20284	0.22519	0.743045		0.477428	0.358808	0.43098	0.875464		down	down	down	down		no	no	no	no
	S	transketolase	TKT	CRYCO00079450	-0.7225	-0.347631	-0.924003	-0.378289		29.7567	21.8067	27.1167	17.1733	17.28		0.0651659	0.376033	0.042976	0.333205		0.179707	0.576659	0.132332	0.543967		down	down	down	down		no	no	no	no
	G	transketolase	TKT	CRYCO00015476	-0.572442	-1.45762	-1.55101	-1.39981		73.8567	55.6333	29.5533	29.2	30.84		1.27e-17	1.26909e-21	6.73739e-63	4.51e-58		9.98e-16	3.94474e-19	1.53683e-59	3.9e-55		down	down	down	down		no	yes	yes	yes
	M	transketolase	TKT	CRYCO00015476	-0.467597	-0.598381	-0.502579	-0.462657		73.8567	58.9333	56.0233	57.3833	57.1367		2.33673e-10	1.60941e-13	3.00904e-13	2.14202e-09		7.73716e-09	6.04863e-12	1.12006e-11	7.1004e-08		down	down	down	down		no	no	no	no
	S	transketolase	TKT	CRYCO00015476	-0.431979	-0.394702	-0.426933	-0.349916		73.8567	59.94	60.57	61.6767	58.79		2.06371e-11	1.74933e-08	1.23405e-09	7.52247e-07		9.58724e-10	4.05584e-07	3.20968e-08	1.41056e-05		down	down	down	down		no	no	no	no
	G	6-phosphofructokinase	PFK	CRYCO00071665	0.642159	0.205954	0.190351	-0.0697599		31.8067	53.21	39.35	41.4233	35.4233		7.72e-12	0.114128	0.069572	0.507741		2.49e-10	0.261191	0.22819	0.761911		up	up	up	down		no	no	no	no
	M	6-phosphofructokinase	PFK	CRYCO00071665	0.538821	0.603795	0.325142	0.229047		31.8067	48.8767	53.6867	43.3	40.25		2.78993e-08	1.34368e-10	0.000366304	0.0463633		5.99865e-07	3.14189e-09	0.00271706	0.162077		up	up	up	up		no	no	no	no
	S	6-phosphofructokinase	PFK	CRYCO00071665	0.381686	0.605088	0.374793	-0.00803207		31.8067	43.27	50.8867	45.8633	35.0067		2.73465e-05	9.44037e-11	0.000236054	0.941859		0.000317016	3.3865e-09	0.00185133	0.971923		up	up	up	down		no	no	no	no
	G	6-phosphofructokinase	PFK	CRYCO00035534	-0.566499	-0.367608	-0.476298	-0.0856284		51.3333	39.3367	44.5	39.82	50.4933		0.00376259	0.0941693	0.0223705	0.634811		0.0146834	0.228636	0.102505	0.839836		down	down	down	down		no	no	no	no
	M	6-phosphofructokinase	PFK	CRYCO00035534	-0.739723	-0.757656	-0.627242	0.0105028		51.3333	35.2967	35.27	36.1	47.1733		0.00214675	0.000142759	0.00266889	0.954767		0.0108172	0.000923896	0.0145905	0.98201		down	down	down	up		no	no	no	no
	S	6-phosphofructokinase	PFK	CRYCO00035534	-0.728914	-0.787983	-0.426898	0.0400899		51.3333	36.2567	34.1067	43.0867	48.19		0.00023398	0.000715961	0.0251806	0.824397		0.00199167	0.0046953	0.0881028	0.909056		down	down	down	up		no	no	no	no
